# Supplementary material
Source: ML conference proceedings conference paper supplement (https://aclanthology.org/P19-1490)
Supplement: Supplementary [file P19-1490.Supplementary.zip]

Archive with 37 entries (29 files):
- graded-le/
- graded-le/cross-lingual/
- graded-le/cross-lingual/hyperlex-hrit.txt
- graded-le/cross-lingual/hyperlex-dehr.txt
- graded-le/cross-lingual/hyperlex-enit.txt
- graded-le/cross-lingual/hyperlex-deit.txt
- graded-le/cross-lingual/hyperlex-ende.txt
- graded-le/cross-lingual/hyperlex-enhr.txt
- graded-le/monolingual/
- graded-le/monolingual/hyperlex-en.txt
- graded-le/monolingual/hyperlex-hr.txt
- graded-le/monolingual/hyperlex-de.txt
- graded-le/monolingual/hyperlex-it.txt
- Guidelines/
- Guidelines/DE-HyperLex-Guidelines.pdf
- Guidelines/EN-HyperLex-Guidelines.pdf
- Guidelines/HR-HyperLex-Guidelines.pdf
- Guidelines/IT-HyperLex-Guidelines.pdf
- README
- ungraded-le/
- ungraded-le/fr-en/
- ungraded-le/fr-en/train
- ungraded-le/fr-en/test-cohyp.txt
- ungraded-le/fr-en/train-cohyp.txt
- ungraded-le/fr-en/test-hypo.txt
- ungraded-le/fr-en/test
- ungraded-le/fr-en/train-hypo.txt
- ungraded-le/ru-en/
- ungraded-le/ru-en/test-cohyp.txt
- ungraded-le/ru-en/train-cohyp.txt
- ungraded-le/ru-en/test-hypo.txt
- ungraded-le/ru-en/train-hypo.txt
- ungraded-le/ar-en/
- ungraded-le/ar-en/test-cohyp.txt
- ungraded-le/ar-en/train-cohyp.txt
- ungraded-le/ar-en/test-hypo.txt
- ungraded-le/ar-en/train-hypo.txt
