# Supplementary material
Source: ML conference proceedings conference paper supplement (https://aclanthology.org/P19-1490)
Supplement: Supplementary [file P19-1490.Supplementary.zip › graded-le/cross-lingual/hyperlex-dehr.txt]

Word1 Word2 POS AVG
hr_bogatstvo de_armut n 0.0
hr_gradonačelnik de_person n 5.63
hr_šljiva de_birne n 0.0
hr_iglu de_hütte n 4.38
de_diebstahl hr_kriminal n 5.63
de_computer hr_stroj n 6.0
hr_osoba de_leser n 0.25
hr_raj de_hölle n 0.0
de_stein hr_nakit n 1.75
hr_krađa de_kriminalität n 5.63
hr_smijati_se de_schreien v 0.0
de_haferflocken hr_hrana n 5.5
de_flüssigkeit hr_tipkovnica n 0.0
de_arbeitnehmer hr_farmer n 0.0
de_kopf hr_tijelo n 0.0
de_flügel hr_anđeo n 0.0
hr_grožđe de_lebensmittel n 5.75
hr_auto de_auto n 5.88
hr_sokol de_adler n 1.13
de_brombeere hr_hrana n 5.63
hr_sukob de_uneinigkeit n 5.0
hr_naslonjač de_sitz n 5.25
de_gipfel hr_vrh n 4.38
de_docht hr_svijeća n 0.0
hr_sir de_butter n 0.0
de_organisation hr_zaklada n 0.0
hr_krumpir de_gemüse n 5.63
hr_tražiti de_untersuchen v 0.25
hr_kćer de_sohn n 0.0
de_kiefer hr_drvo n 6.0
hr_prtljaga de_koffer n 0.0
de_sagen hr_predložiti v 0.5
hr_zaključak de_anfang n 0.13
de_meer hr_voda n 5.5
de_atmosphäre hr_ubojica n 0.0
de_ehe hr_igla n 0.0
hr_vid de_wahrnehmung n 4.38
de_zwölf hr_broj n 5.75
hr_baciti de_nerven v 0.13
hr_svinjetina de_fleisch n 5.88
hr_glava de_körper n 0.0
hr_bol de_symptom n 4.63
de_kartoffel hr_povrće n 5.63
de_wasser hr_led n 0.75
hr_nastaviti de_unterbrechen v 0.0
hr_kontrola de_experiment n 0.5
de_lippe hr_usta n 0.0
hr_noga de_knie n 0.0
hr_kalkulator de_computer n 4.5
hr_zima de_jahreszeit n 5.88
de_ermöglichen hr_prikačiti v 0.0
hr_naušnica de_schmuck n 6.0
hr_algebra de_mathematik n 6.0
de_ameise hr_insekt n 5.88
de_schauen hr_rastegnuti v 0.0
hr_izvedba de_sitz n 0.0
hr_prevara de_täuschung n 5.5
hr_stvoriti de_bauen v 1.75
hr_biolog de_chemiker n 0.63
hr_nadražiti de_verbringen v 0.25
de_arbeitnehmer hr_konobarica n 0.0
de_damhirschkuh hr_životinja n 6.0
de_moskito hr_insekt n 6.0
hr_redovnik de_gegner n 0.0
de_flosse hr_riba n 0.0
de_wasserfall hr_tenis n 0.0
de_moor hr_močvara n 3.25
de_morgen hr_inteligencija n 0.0
de_glühen hr_blistati v 4.0
de_chirurg hr_liječnik n 5.88
de_feuer hr_voda n 0.0
de_süden hr_sjever n 0.0
hr_avenija de_straße n 5.38
de_ausführen hr_razgovarati v 0.25
de_zeichnen hr_stvoriti v 3.25
de_abdomen hr_tijelo n 0.0
de_gemüse hr_špinat n 0.0
hr_srž de_knochen n 0.13
hr_životinja de_container n 0.0
hr_obrok de_snack n 1.13
de_hausaufgaben hr_rad n 3.88
de_sieger hr_pobjednik n 5.25
hr_bjelančevina de_milch n 0.38
hr_priča de_erzählung n 4.88
hr_povijest de_juwel n 0.0
de_eimer hr_spremnik n 4.75
hr_dama de_schloss n 0.0
hr_misao de_reflexion n 3.38
hr_mit de_mythologie n 1.63
hr_nomad de_person n 5.38
hr_kvadrat de_form n 6.0
de_cremespeise hr_hrana n 4.88
hr_značenje de_unsinn n 0.0
hr_skupina de_mitarbeiter n 0.0
hr_izdajnik de_dieb n 0.75
hr_zelena de_blau n 0.25
hr_bilješka de_studentenverbindung n 0.0
de_land hr_regija n 5.0
hr_krema de_gebäude n 0.0
hr_globus de_kugel n 5.0
hr_kiselina de_schale n 0.0
de_volleyball hr_igra n 5.63
de_tier hr_patka n 0.0
de_wissenschaft hr_anatomija n 0.0
de_fachmann hr_stručnjak n 3.75
de_blume hr_prekršaj n 0.0
hr_kit de_säugetier n 5.88
hr_pjevač de_beweis n 0.0
de_feind hr_krokodil n 0.25
de_petersilie hr_hrana n 5.38
de_elend hr_tuga n 1.38
hr_četiri de_nummer n 5.75
hr_slovo de_alphabet n 0.38
hr_računalo de_maschine n 6.0
de_feind hr_protivnik n 4.75
de_juwel hr_dragulj n 5.63
de_sport hr_sjekira n 0.0
hr_film de_sonne n 0.0
de_infinitesimalrechnung hr_matematika n 5.38
de_geometrie hr_matematika n 5.75
hr_usna de_zunge n 0.0
hr_blagajnik de_person n 5.63
hr_tkivo de_organ n 0.0
de_gruppe hr_banda n 0.13
hr_odbiti de_akzeptieren v 0.0
hr_kljova de_pflicht n 0.0
hr_prijelaz de_straße n 2.0
hr_cvijet de_känguru n 0.0
hr_radio de_medium n 6.0
de_karotte hr_hrana n 5.88
de_popcorn hr_hrana n 4.75
de_spinat hr_povrće n 5.75
hr_značenje de_freiheit n 0.0
de_haut hr_tkivo n 5.38
hr_zglob de_ellbogen n 0.0
hr_podijeliti de_erhalten v 0.13
hr_čekati de_ergreifen v 0.0
hr_stolica de_anfang n 0.0
hr_kovčeg de_tasche n 3.5
hr_kemija de_wissenschaft n 6.0
de_sitzen hr_stajati v 0.13
hr_kanu de_boot n 5.75
de_leiche hr_tron n 0.0
de_säugetier hr_pas n 0.0
de_adjektiv hr_riječ n 6.0
de_feuerwaffe hr_puška n 0.13
hr_sport de_aktivität n 5.88
hr_prst de_handschuh n 0.13
de_baseball hr_sport n 6.0
de_profit hr_gubitak n 0.0
hr_madrac de_zusatz n 0.0
hr_sluga de_sklave n 1.38
hr_sjekira de_werkzeug n 5.88
hr_ritual de_brauch n 4.88
hr_patka de_vogel n 5.63
hr_žena de_armband n 0.0
hr_nos de_gesicht n 0.0
de_täuschung hr_prevara n 5.5
de_baumwolle hr_tkanina n 5.25
hr_udariti de_vernichten v 2.5
hr_podijeliti de_reißen v 0.63
de_mörder hr_lopov n 1.25
hr_bulevar de_straße n 5.69
de_astronomie hr_znanost n 6.0
de_spur hr_nogostup n 0.0
hr_omesti de_halten v 1.25
hr_radnik de_arbeit n 0.0
hr_dan de_woche n 0.0
hr_podbaciti de_arbeiten v 0.25
de_prinzessin hr_kraljevstvo n 0.5
de_arzt hr_kirurg n 0.0
de_drei hr_šest n 0.0
de_fähigkeit hr_rukovodstvo n 0.38
hr_rijeka de_herr n 0.0
de_konzert hr_događaj n 5.75
de_regal hr_ormar n 0.5
hr_predsjednik de_führer n 5.5
de_bett hr_spavaonica n 0.13
de_schimpanse hr_gorila n 0.13
de_snack hr_hrana n 4.25
hr_vikati de_sprechen v 4.63
de_freund hr_protivnik n 0.38
de_haufen hr_plast n 0.0
hr_nož de_schwert n 1.0
de_mut hr_borbenost n 0.5
de_bestätigen hr_zanemariti v 0.0
hr_tetka de_planet n 0.0
hr_požurivati de_vorschlagen v 0.5
hr_zamjenica de_wort n 6.0
de_frau hr_narukvica n 0.0
hr_snaga de_fähigkeit n 4.88
hr_rak de_lebensmittel n 4.25
de_gummi hr_materijal n 5.63
de_brühe hr_hrana n 5.38
hr_smeđa de_grün n 0.0
hr_stablo de_wald n 0.38
de_möbel hr_fotelja n 0.0
de_gauner hr_bolest n 0.0
hr_peršin de_lebensmittel n 5.38
de_gans hr_purica n 0.38
de_absteigen hr_stvoriti v 0.0
hr_nož de_dolch n 0.63
hr_oštrica de_mäher n 0.13
de_analysieren hr_upropastiti v 0.0
de_nörgeln hr_žaliti_se v 5.13
de_umstand hr_situacija n 3.63
de_taschenlampe hr_agencija n 0.0
de_gräber hr_rudar n 1.75
hr_prolaz de_heuschrecke n 0.0
hr_miš de_tier n 6.0
de_eimer hr_bačva n 0.75
hr_esej de_absatz n 0.0
hr_knjiga de_atlas n 0.0
hr_uplata de_miete n 0.13
hr_krastavac de_lebensmittel n 5.5
de_motor hr_vlak n 0.0
de_arm hr_ekstremitet n 5.5
de_reden hr_osloviti v 0.88
hr_špijun de_agent n 5.5
de_treffen hr_konferencija n 0.38
hr_lizalica de_süßigkeiten n 5.88
de_säbel hr_mač n 4.25
de_blau hr_boja n 6.0
hr_micati de_drängen v 0.13
de_scharnier hr_vrata n 0.0
hr_majka de_frau n 5.5
de_tornado hr_oluja n 5.63
hr_komarac de_weisheit n 0.0
hr_stetoskop de_instrument n 5.75
hr_država de_region n 5.0
hr_ptica de_gänserich n 0.0
hr_crta de_salbe n 0.0
de_rückseite hr_naprijed n 0.0
de_sitzen hr_ljenčariti v 1.0
hr_trbuh de_körper n 0.0
de_operation hr_odmor n 0.0
de_zerstören hr_okusiti v 0.0
de_kommen hr_napustiti v 0.13
de_kanone hr_pištolj n 0.13
hr_polica de_wandschrank n 0.5
de_henne hr_pile n 0.13
hr_vrijeme de_raum n 0.25
de_delphin hr_kisik n 0.0
hr_kupus de_salat n 5.75
de_auswahl hr_izbor n 5.13
hr_šaptati de_reden v 4.88
hr_celer de_gemüse n 6.0
de_banjo hr_gitara n 2.75
de_vater hr_predak n 5.5
de_eiche hr_ogrlica n 0.0
hr_simptom de_orchidee n 0.0
hr_voda de_pfütze n 0.0
hr_kolumna de_zeitung n 0.13
de_pausieren hr_trčanje v 0.0
de_saft hr_mlijeko n 0.0
hr_aroma de_ärmel n 0.0
de_läufer hr_atletičar n 5.88
de_tugend hr_kvaliteta n 4.5
hr_krokodil de_tier n 6.0
de_falte hr_koža n 0.5
de_drachen hr_ptica n 0.5
de_symptom hr_bolest n 0.75
de_psychologie hr_znanost n 5.75
de_berechnen hr_računati v 4.88
hr_zaboraviti de_verringern v 0.88
hr_nastavak de_zusatz n 4.0
hr_zahod de_alligator n 0.0
de_arbeitnehmer hr_tehničar n 0.0
hr_tkanina de_baumwolle n 0.0
hr_rat de_anatomie n 0.0
hr_protivnik de_chor n 0.0
de_verein hr_organizacija n 5.38
de_gebäude hr_konstrukcija n 5.0
hr_izvoditi de_unterhalten v 0.25
de_posaune hr_instrument n 6.0
hr_kupina de_lebensmittel n 5.63
de_bar hr_gostionica n 4.13
hr_nadvladati de_besiegen v 3.5
de_fähigkeit hr_snaga n 2.63
hr_osloviti de_stand v 0.0
hr_vjenčati_se de_heiraten v 3.25
de_tor hr_dlijeto n 0.0
de_alligator hr_životinja n 6.0
de_diktator hr_vladar n 5.75
de_schublade hr_stol n 0.0
hr_promatrati de_beenden v 0.0
hr_violina de_instrument n 6.0
hr_zatvarač de_hose n 0.0
hr_pedala de_fahrrad n 0.0
de_chili hr_hrana n 4.5
hr_žena de_ring n 0.0
hr_škrabati de_schreiben v 4.63
de_wurst hr_hrana n 5.5
de_ausflug hr_putovanje n 5.38
de_elefant hr_životinja n 6.0
hr_kralj de_herrscher n 5.63
hr_integrirati de_mischen v 2.63
hr_čarapa de_strumpfhose n 0.0
hr_lopov de_krankheit n 0.0
de_gasse hr_put n 5.38
hr_puž de_mut n 0.0
de_betrachtung hr_misao n 2.25
de_direktor hr_dirigent n 1.25
hr_pogledati de_bewerten v 0.5
de_geschirrspüler hr_uređaj n 5.88
hr_skakavac de_kricket n 0.0
hr_konj de_mannschaft n 0.0
de_pflaume hr_kruška n 0.0
de_unze hr_mjera n 5.63
de_rennen hr_natjecanje n 5.25
de_herbst hr_period n 5.88
hr_uređaj de_ofen n 0.0
de_mythos hr_mitologija n 1.63
hr_naslov de_technik n 0.0
hr_kava de_milch n 0.0
de_oregano hr_hrana n 4.13
hr_dopustiti de_anfügen v 0.0
de_dichtung hr_zmaj n 0.0
de_schaf hr_stado n 0.25
de_asien hr_Afrika n 0.0
de_arbeitnehmer hr_rad n 0.0
de_bewegung hr_akcija n 4.88
hr_posada de_gruppe n 4.88
de_kopf hr_strijela n 0.0
de_warenhaus hr_spremište n 5.75
de_erodieren hr_zafrkavati v 0.0
de_trauma hr_ozljeda n 4.75
de_geben hr_poslati v 1.13
hr_projekt de_element n 0.0
hr_hrast de_halskette n 0.0
de_rippe hr_životinja n 0.0
hr_komponenta de_element n 1.88
hr_štititi de_verteidigen v 4.88
de_berechnen hr_dostaviti v 0.38
de_gewebe hr_koža n 0.0
de_schloss hr_vrata n 0.0
de_buch hr_atlas n 0.0
de_steuerbord hr_zahod n 0.0
hr_guska de_tier n 6.0
hr_kost de_kiefer n 0.0
hr_stručnjak de_fachmann n 5.0
hr_kisik de_gas n 5.63
hr_vidra de_tier n 6.0
hr_deblo de_elefant n 0.0
de_krautsalat hr_hrana n 5.75
hr_opasnost de_risiko n 1.88
de_bürgermeister hr_osoba n 5.63
hr_teren de_stadion n 0.25
hr_natjecanje de_rennen n 0.5
de_schuld hr_nevinost n 0.0
hr_razviti de_lernen v 2.25
hr_unca de_maß n 5.63
hr_teletina de_lebensmittel n 5.38
hr_prekinuti de_starten v 0.13
de_elefant hr_predavanje n 0.0
hr_skalpel de_instrument n 5.25
hr_liječenje de_saxophon n 0.0
de_tenor hr_bas n 0.0
hr_užina de_lebensmittel n 4.25
de_elternteil hr_dijete n 1.13
hr_dimnjak de_schwan n 0.0
de_zeremonie hr_oštrica n 0.0
de_vater hr_violina n 0.0
hr_ubrzati de_eingestehen v 0.0
hr_oposum de_tier n 6.0
hr_sigurnost de_achtung n 0.13
de_boulevard hr_cesta n 5.75
de_tod hr_rođenje n 0.0
hr_časnost de_aufrichtigkeit n 2.13
hr_igra de_schach n 0.0
hr_potok de_linie n 1.13
de_rechteck hr_oblik n 5.75
hr_vatreno_oružje de_gewehr n 0.13
de_verändern hr_uvjeriti v 0.25
de_bühne hr_razbojnik n 0.0
hr_ljenčariti de_sitzen v 0.13
de_symptom hr_bol n 0.0
de_veranda hr_kuća n 0.13
hr_bacač de_fänger n 0.13
hr_špic de_bleistift n 0.5
hr_znamenka de_nummer n 3.75
hr_dvorac de_zuhause n 3.0
hr_Saturn de_venus n 0.0
hr_vozilo de_utensil n 1.38
de_person hr_čitatelj n 0.25
hr_poruka de_hinweis n 3.25
hr_papa de_führer n 5.38
hr_kuhati de_brennen v 0.0
de_einbrecher hr_lopov n 5.38
de_kammer hr_bajka n 0.0
hr_čin de_theater n 0.0
hr_blokada de_barriere n 4.63
hr_natrag de_vorderseite n 0.0
de_angst hr_tenor n 0.0
de_hülle hr_mahuna n 0.5
hr_kanarinac de_vogel n 5.88
de_kopf hr_stopalo n 0.0
de_hund hr_životinja n 6.0
hr_ovca de_herde n 0.25
de_medium hr_televizija n 0.0
hr_piramida de_form n 5.25
de_orchidee hr_biljka n 6.0
de_kamel hr_životinja n 6.0
de_felge hr_kotač n 0.5
de_bekanntmachung hr_vijesti n 3.63
hr_konj de_zucht n 0.0
de_meile hr_inč n 0.0
de_säure hr_ljuska n 0.0
de_krabbe hr_hrana n 4.25
hr_časnik de_recht n 0.38
hr_kotlić de_teekanne n 0.75
hr_otići de_ankommen v 0.38
hr_pustiti de_halten v 0.0
de_regal hr_brojač n 0.0
hr_rubin de_smaragd n 0.0
hr_reći de_empfehlen v 0.25
de_wanne hr_kupaonica n 0.0
de_bildung hr_carstvo n 0.0
de_rücken hr_tijelo n 0.0
de_pilz hr_čudovište n 0.0
hr_kaput de_kamin n 0.0
hr_slon de_säugetier n 6.0
hr_hobi de_interesse n 5.0
hr_dijamant de_juwel n 5.25
hr_dobiti de_rekrutieren v 1.0
de_fest hr_okupljanje n 5.0
de_führung hr_sposobnost n 1.75
de_stapel hr_gomila n 4.13
hr_tama de_licht n 0.38
de_leber hr_organ n 6.0
de_kurve hr_praznovjerje n 0.0
de_führer hr_kralj n 0.13
hr_leš de_körper n 5.25
hr_pogledati de_starren v 1.25
de_barsch hr_riba n 6.0
hr_autocesta de_straße n 5.75
de_ei hr_arhitektura n 0.0
hr_kriket de_spiel n 5.75
de_adler hr_ptica n 6.0
de_spion hr_agent n 5.5
hr_poručnik de_offizier n 3.88
hr_percepcija de_vision n 0.63
hr_utrka de_wettbewerb n 5.25
de_kommunikation hr_razgovor n 0.88
hr_prijatelj de_feind n 0.38
hr_kikiriki de_kaschunuss n 0.0
hr_ujediniti de_teilen v 0.0
de_paket hr_omotnica n 0.13
hr_kip de_kunst n 4.25
hr_čovjek de_frau n 0.0
hr_gležanj de_bein n 0.0
hr_osoba de_kassierer n 0.0
de_mandel hr_kikiriki n 0.0
de_biologe hr_kemičar n 0.63
hr_piće de_limonade n 0.0
hr_svila de_material n 5.5
hr_aktivnost de_hobby n 0.38
hr_rječnik de_rede n 0.13
de_schaufel hr_kanta n 0.0
hr_nećakinja de_sohn n 0.0
de_helm hr_zaštita n 5.88
de_milch hr_maslac n 0.0
hr_šaka de_arm n 0.25
hr_trijem de_haus n 0.13
de_haar hr_sisavac n 0.25
hr_nadgrobni_spomenik de_grab n 0.63
de_hassen hr_odraziti v 0.0
hr_pukotina de_loch n 5.25
de_tenor hr_pjevač n 5.25
de_nachrichten hr_informacija n 4.88
hr_namještaj de_stuhl n 0.0
hr_majka de_erwachsene n 5.13
de_skalpell hr_alat n 5.88
de_hausaufgaben hr_naputak n 1.75
de_zunge hr_grlo n 0.0
de_wissenschaft hr_geologija n 0.0
de_käfer hr_insekt n 6.0
de_roman hr_fikcija n 3.0
de_könig hr_vladar n 5.63
hr_kiša de_dusche n 0.5
hr_car de_herrscher n 5.88
de_daumen hr_prst n 5.5
de_infinitesimalrechnung hr_salata n 0.0
hr_odrezak de_lebensmittel n 5.5
hr_tijelo de_leiche n 0.75
de_eis hr_ledenjak n 0.13
de_küche hr_spavaonica n 0.0
de_christ hr_crkva n 0.5
de_satan hr_vrag n 5.25
hr_dohvatiti de_erhöhen v 0.13
de_niere hr_organ n 6.0
de_tastatur hr_računalo n 0.0
hr_krava de_tier n 6.0
de_empfangen hr_dobiti v 4.88
de_anfügen hr_spojiti v 4.0
hr_zbrojiti de_multiplizieren v 1.0
hr_glava de_fuß n 0.0
hr_rep de_wasser n 0.0
de_maskara hr_ruž n 0.0
de_sechs hr_sedam n 0.0
hr_vrata de_eingang n 5.0
de_statue hr_umjetnost n 4.25
hr_zafrkavati de_stören v 3.88
hr_dragulj de_ring n 0.0
hr_sluh de_sicht n 0.0
hr_pogreb de_zeremonie n 5.38
de_adresse hr_stajati v 0.0
de_licht hr_aura n 0.88
hr_pisaći_stroj de_maschine n 5.75
hr_odbojka de_aktivität n 5.63
hr_publikacija de_zeitschrift n 0.63
de_vortäuschen hr_namočiti v 0.0
de_arbeitnehmer hr_zidar n 0.0
de_pony hr_konj n 5.63
hr_rubin de_juwel n 5.38
hr_mrziti de_reflektieren v 0.0
hr_janje de_tier n 6.0
hr_osoba de_bürger n 0.0
hr_patka de_tier n 6.0
hr_brašno de_hochzeit n 0.0
hr_željeti de_trennen v 0.0
hr_tekst de_gedicht n 0.13
de_mund hr_svemir n 0.0
de_feige hr_datum n 0.0
de_cent hr_dolar n 0.38
de_sprosse hr_ljestve n 1.38
de_krähe hr_ptica n 6.0
de_substanz hr_voda n 0.0
de_ekstase hr_osjećaj n 5.5
de_bein hr_koljeno n 0.0
de_wandschrank hr_soba n 0.0
de_angreifen hr_juriš v 2.5
de_stärke hr_sposobnost n 4.88
de_makkaroni hr_hrana n 5.63
de_leser hr_osoba n 5.0
hr_članak de_finger n 0.25
de_blumenkohl hr_hrana n 5.88
de_strom hr_linija n 1.13
de_elefant hr_sisavac n 6.0
de_adjektiv hr_glagol n 0.25
de_schnecke hr_životinja n 6.0
de_bruder hr_bratstvo n 0.13
de_fahrrad hr_vozilo n 5.88
hr_kivi de_obst n 6.0
hr_životinja de_biest n 1.13
de_mantel hr_kamin n 0.0
de_königreich hr_teritorij n 5.25
de_kritzeln hr_pisati v 4.63
hr_mikrovalna de_gerät n 5.88
de_strom hr_kisik n 0.0
de_schicksal hr_haljina n 0.0
de_toilette hr_komunikacija n 0.0
de_glaube hr_praznovjerje n 1.38
hr_sudbina de_kleid n 0.0
de_tunnel hr_prolaz n 4.75
hr_ladica de_brust n 0.13
de_fehler hr_vladar n 0.0
hr_mreža_za_ležanje de_bett n 3.0
de_hinzufügen hr_pomnožiti v 1.0
hr_vrata de_tür n 3.88
de_säugetier hr_mačka n 0.0
de_behalten hr_dati v 0.0
hr_vilica de_mode n 0.0
de_gehen hr_odbaciti v 0.25
de_walross hr_sisavac n 5.75
hr_šiljak de_schuh n 0.0
hr_biskup de_könig n 0.5
de_treiben hr_plutati v 0.5
de_gruppe hr_zbor n 0.38
hr_bubanj de_instrument n 6.0
de_übung hr_aktivnost n 5.38
de_ausführen hr_pjevati v 0.13
de_stellen hr_dati v 0.38
de_bewegen hr_istovariti v 0.13
de_bewerten hr_odraziti v 1.5
hr_neprijatelj de_freund n 0.38
hr_automobil de_fahrzeug n 5.63
de_entdecker hr_moreplovac n 0.38
de_reim hr_večera n 0.0
de_lid hr_oko n 0.0
de_dichter hr_osoba n 5.88
de_racquetball hr_sport n 6.0
de_mensch hr_muškarac n 0.13
hr_mehaničar de_arbeitnehmer n 5.63
hr_konj de_säugetier n 6.0
hr_tuga de_vater n 0.0
hr_palača de_zuhause n 3.5
hr_stolica de_möbel n 5.88
hr_kviz de_prüfung n 4.75
hr_pastrva de_fisch n 6.0
de_anhänger hr_vođa n 0.13
hr_prasak de_lärm n 5.75
de_integrität hr_poštenje n 3.13
hr_tekućina de_wasser n 0.0
de_gemüse hr_rajčica n 0.0
de_kunst hr_skulptura n 0.13
de_fernsehen hr_medij n 5.5
de_mensch hr_sisavac n 5.25
hr_pijesak de_strand n 0.38
hr_svojstvo de_gesicht n 0.0
hr_keks de_plätzchen n 4.13
de_betrieb hr_duh n 0.0
hr_bicikl de_fahrzeug n 5.88
de_geisel hr_zarobljenik n 5.75
hr_kirurg de_arzt n 5.88
hr_slomiti de_zermalmen v 0.38
hr_liječenje de_therapie n 3.63
de_diebstahl hr_dodatak n 0.0
de_pudding hr_desert n 5.88
hr_dragulj de_edelstein n 5.63
de_manguste hr_životinja n 5.5
hr_inč de_maß n 5.75
hr_obala de_strand n 0.38
hr_tegliti de_tragen v 5.25
de_leck hr_rupa n 5.25
de_experte hr_profesionalac n 5.0
hr_kisik de_wasser n 0.13
de_skalpell hr_kanarinac n 0.0
de_maulwurf hr_životinja n 6.0
de_herde hr_skupina n 5.5
de_heuschrecke hr_cvrčak n 0.0
hr_puška de_pistole n 0.25
hr_ugušiti de_töten v 5.63
de_axt hr_alat n 5.88
hr_sandala de_schuh n 5.75
hr_stolica de_toilette n 0.0
de_person hr_građanin n 0.0
hr_čitatelj de_person n 5.0
hr_kvadrat de_kreis n 0.0
hr_obilje de_knappheit n 0.0
de_vereinen hr_podijeliti v 0.0
hr_časnik de_polizei n 0.88
de_hängematte hr_krevet n 3.0
hr_štene de_tier n 5.75
de_geige hr_violončelo n 0.13
hr_materijal de_gummi n 0.0
hr_svinja de_schwein n 4.63
de_mitarbeiter hr_radnik n 5.0
hr_mošus de_duft n 5.0
hr_scena de_bild n 1.0
hr_čovjek de_mann n 0.13
de_fazit hr_početak n 0.13
hr_brada de_ziege n 0.0
hr_gutati de_verschwenden v 0.25
de_beobachten hr_zaustaviti v 0.0
hr_uzeti de_behalten v 0.63
hr_predvorje de_seide n 0.0
de_alligator hr_gmaz n 6.0
hr_meso de_mensch n 0.0
hr_kit de_höhle n 0.0
de_heugabel hr_smjesa n 0.0
de_sport hr_odbojka n 0.0
de_gesellschaft hr_narod n 0.5
de_kaktus hr_biljka n 5.63
de_zitrone hr_voće n 5.88
de_squash hr_igra n 5.63
de_werbespot hr_oglas n 5.5
de_kanu hr_čamac n 5.75
de_wal hr_špilja n 0.0
hr_tuljan de_tier n 6.0
de_blaubeere hr_bobica n 6.0
de_bewerten hr_suditi v 4.38
hr_matematika de_wissenschaft n 5.88
de_buchstabe hr_znak n 5.75
hr_automobil de_limousine n 0.0
hr_pištolj de_waffe n 6.0
hr_tjestenina de_salat n 0.38
hr_zvučnik de_hölle n 0.0
hr_pozornica de_plattform n 3.75
hr_origano de_lebensmittel n 4.13
hr_rana de_verletzung n 5.25
hr_vuk de_tier n 6.0
de_detail hr_poanta n 0.25
de_soße hr_hrana n 3.88
hr_kišobran de_schutz n 4.88
hr_jug de_norden n 0.0
hr_mjerač de_bürgersteig n 0.0
hr_rak de_krankheit n 5.75
de_indiz hr_indicija n 4.25
hr_ujak de_tante n 0.13
de_behandlung hr_liječenje n 1.25
de_ulme hr_hrast n 0.0
hr_strijela de_wunde n 0.0
hr_napomenuti de_erschlagen v 0.13
de_akzeptieren hr_obnoviti v 0.13
hr_jagoda de_obst n 6.0
de_symptom hr_orhideja n 0.0
de_löffel hr_vilica n 0.0
de_meter hr_mjera n 5.25
de_seehund hr_životinja n 6.0
de_rotkehlchen hr_ptica n 6.0
de_liebe hr_osjećaj n 5.88
hr_mramor de_stein n 5.63
hr_sok de_milch n 0.0
hr_violina de_geige n 5.63
hr_brava de_tür n 0.0
de_union hr_grupa n 4.38
hr_uvrijediti de_verletzen v 4.13
hr_sendvič de_mahlzeit n 4.0
de_effekt hr_reakcija n 1.0
hr_jutro de_nacht n 0.0
hr_zadaća de_anweisung n 1.75
hr_priznati de_kaufen v 0.0
hr_školjka de_mießmuschel n 0.25
hr_alkohol de_substanz n 5.25
de_frau hr_heroina n 0.25
de_pik hr_karta n 4.25
de_chor hr_skupina n 5.75
hr_kuhinja de_schlafzimmer n 0.0
hr_pas de_säugetier n 6.0
hr_oprostiti de_überzeugen v 0.0
hr_srebro de_metall n 5.5
hr_galon de_pint n 0.0
hr_pojam de_verfassung n 0.0
hr_roditelj de_vorfahr n 5.5
hr_razbiti de_zerbrechen v 3.63
hr_simptom de_schmerzen n 0.0
de_hand hr_ruka n 0.25
de_beobachten hr_gledati v 5.63
de_brot hr_sendvič n 0.0
de_wissen hr_predviđanje n 0.25
hr_zakonodavstvo de_regierung n 2.88
de_offizier hr_zakon n 0.38
de_werfen hr_pauzirati v 0.0
de_spalte hr_papir n 0.0
hr_plovilo de_fahrzeug n 4.63
hr_napustiti de_steuern v 0.13
de_schublade hr_ured n 0.0
hr_skvoš de_spiel n 5.63
hr_izlet de_reise n 5.38
de_schmerzen hr_simptom n 4.63
hr_razgovor de_kommunikation n 5.75
de_zwiebel hr_hrana n 5.25
hr_instrument de_skalpell n 0.0
de_verweigern hr_zdrobiti v 0.13
hr_voda de_substanz n 5.63
de_fahrzeug hr_automobil n 0.0
hr_udariti de_knallen v 0.75
de_ersticken hr_ubiti v 5.63
hr_brisati de_reiben v 2.88
de_helium hr_plin n 5.75
de_universum hr_svijet n 1.25
de_leistung hr_glina n 0.0
de_gas hr_automobil n 0.0
de_blenden hr_odražavati v 2.13
de_material hr_najlon n 0.0
hr_znanje de_voraussicht n 0.25
de_fragen hr_podsjetiti v 0.38
de_stickstoff hr_kisik n 0.0
de_beil hr_alat n 5.88
de_vanillesoße hr_hrana n 4.25
de_sonnenuntergang hr_večer n 1.13
de_nichte hr_sin n 0.0
hr_osjećaj de_angst n 0.0
de_symbol hr_slovo n 0.0
hr_dupin de_sauerstoff n 0.0
de_fisch hr_grgeč n 0.0
de_mais hr_hrana n 5.75
hr_priznati de_verweigern v 0.0
de_zeremonie hr_diploma n 0.38
hr_kada de_badezimmer n 0.0
de_regenbogen hr_nebo n 0.38
de_person hr_penjač n 0.13
hr_odbojka de_sport n 6.0
hr_integritet de_arbeitnehmer n 0.0
hr_umak de_soße n 5.88
de_begehren hr_napad v 0.0
de_rücken hr_rame n 0.0
hr_sestrinstvo de_organisation n 5.75
de_sauerstoff hr_plin n 5.63
de_muschel hr_plodovi_mora n 5.63
hr_kralj de_königin n 0.0
de_reißverschluss hr_hlače n 0.0
hr_dušik de_element n 5.63
hr_odvojiti de_teilen v 2.88
de_norden hr_smjer n 5.75
hr_bakar de_bronze n 0.75
hr_protuotrov de_medizin n 5.63
de_hinweis hr_sestrinstvo n 0.0
de_schnitt hr_ozljeda n 5.63
de_grund hr_intelekt n 0.0
de_kanarienvogel hr_pero n 0.0
hr_pramac de_toilette n 0.0
de_boden hr_zemlja n 2.75
hr_stog de_haufen n 4.13
de_verstehen hr_vrednovati v 0.0
de_spitze hr_cipela n 0.0
hr_zaposlenje de_arbeit n 4.63
hr_krilo de_flugzeug n 0.0
de_berühren hr_zgrabiti v 0.25
de_vorderseite hr_pozadina n 0.0
de_nachdenken hr_razmišljati v 5.63
hr_autoritet de_macht n 5.0
hr_alat de_schraubendreher n 0.0
hr_juha de_lebensmittel n 5.38
hr_zapad de_richtung n 5.75
hr_nogomet de_sport n 5.63
de_straße hr_put n 5.38
de_schicksal hr_mornar n 0.0
hr_sotona de_gott n 0.75
hr_razred de_gruppe n 5.63
hr_tjedan de_monat n 0.0
hr_džoker de_karte n 5.75
hr_jazz de_musik n 5.88
de_lamm hr_životinja n 6.0
de_fass hr_spremnik n 5.0
hr_gorila de_affe n 5.75
hr_softball de_fußball n 0.0
hr_pomaknuti de_bleiben v 0.0
hr_mit de_legende n 4.5
de_ernten hr_dobiti v 2.06
de_orange hr_voće n 6.0
de_baumwolle hr_materijal n 5.75
de_tornado hr_tajfun n 0.13
de_schützen hr_braniti v 4.88
de_schutz hr_kaciga n 0.0
hr_maramica de_mahlzeit n 0.0
de_summen hr_zviždati v 0.25
hr_mlažnjak de_flugzeug n 5.88
hr_sjekirica de_werkzeug n 5.88
hr_heroina de_frau n 5.25
hr_gusak de_biologie n 0.13
de_tastatur hr_klavir n 0.25
hr_vladar de_diktator n 0.5
hr_kraljevstvo de_gebiet n 5.25
hr_odsutnost de_medizin n 0.0
de_braun hr_zelena n 0.0
hr_pilula de_medikation n 4.5
hr_skupina de_chor n 0.38
de_debattieren hr_razgovor v 5.13
hr_mozak de_bewegung n 0.0
de_verein hr_skupina n 4.75
hr_oružje de_dolch n 0.0
hr_biljka de_tier n 0.0
hr_fotoaparat de_anatomie n 0.0
de_korbwiege hr_kolijevka n 5.75
hr_pauza de_laufen v 0.0
hr_zafrkavati de_nerven v 3.75
de_warten hr_ugrabiti v 0.0
de_necken hr_gnjaviti v 3.88
de_stickstoff hr_element n 5.63
hr_sila de_schwere n 0.0
de_essig hr_kiselina n 4.88
de_kricket hr_igra n 5.75
de_kastanienbraun hr_boja n 5.5
de_verfahren hr_operacija n 0.5
de_schuster hr_pita n 0.0
de_känguru hr_životinja n 6.0
hr_srp de_werkzeug n 5.88
hr_kovčeg de_gepäck n 5.38
de_subtrahieren hr_pomnožiti v 0.0
de_novize hr_početnik n 5.25
de_scheibe hr_prozor n 1.0
de_pfirsich hr_kruška n 0.0
hr_stanarina de_zahlung n 3.88
de_schinken hr_meso n 5.88
hr_sablja de_schwert n 4.25
hr_remi de_spiel n 5.5
hr_brak de_status n 3.75
de_golf hr_igra n 5.63
de_romme hr_igra n 5.5
hr_tri de_sechs n 0.0
hr_rulja de_gruppe n 5.13
de_wortschatz hr_govor n 0.13
hr_uređaj de_waschmaschine n 0.0
de_katze hr_životinja n 6.0
hr_rum de_alkohol n 6.0
hr_sef de_bank n 0.13
de_kind hr_obitelj n 2.13
hr_vijak de_schloss n 0.0
hr_šljiva de_obst n 6.0
hr_govoriti de_klopfen v 0.0
de_verzichten hr_poraziti v 0.25
hr_šišmiš de_tier n 6.0
de_vater hr_majka n 0.0
de_versagen hr_uspjeh n 0.0
de_wein hr_grožđe n 0.13
de_kiwi hr_voće n 6.0
de_mischen hr_integrirati v 2.5
de_kamera hr_anatomija n 0.0
hr_sjedalo de_thron n 0.5
de_gefahr hr_rizik n 1.88
hr_vući de_drücken v 0.38
hr_grana de_baum n 0.0
de_spielball hr_igračka n 5.63
hr_oštrica de_messer n 1.13
de_schlucken hr_upropastiti v 0.25
de_pinguin hr_ptica n 5.38
de_nikotin hr_duhan n 0.0
hr_sisavac de_tier n 5.88
hr_formula de_bäcker n 0.0
hr_jetra de_herz n 0.0
hr_zdjela de_bowling n 0.0
de_trösten hr_utješiti v 2.88
hr_bolest de_krebs n 0.0
hr_pravokutnik de_form n 5.75
hr_plodovi_mora de_muschel n 0.0
de_kind hr_koza n 0.0
de_lachs hr_riba n 5.88
hr_dušik de_sauerstoff n 0.0
de_splitter hr_komad n 3.75
de_ehemann hr_zmija n 0.0
de_saturn hr_planet n 5.88
de_mission hr_zadatak n 4.88
hr_kapak de_auge n 0.0
hr_okno de_fenster n 1.0
de_wolkenkratzer hr_zgrada n 5.63
de_gabel hr_moda n 0.0
hr_komadić de_portion n 2.75
de_lehm hr_cigla n 0.0
hr_zadatak de_pflicht n 3.0
de_spiel hr_šah n 0.0
hr_liječenje de_behandlung n 5.5
hr_psihologija de_wissenschaft n 5.75
hr_govoriti de_schreien v 0.25
hr_držati de_warten v 0.88
hr_trgovina de_geschäft n 5.63
hr_palačinka de_waffel n 0.38
hr_siromaštvo de_disziplin n 0.0
hr_puška de_waffe n 6.0
de_steuerung hr_eksperiment n 0.5
hr_detalj de_punkt n 0.25
hr_usta de_gesicht n 0.0
de_mutter hr_otac n 0.0
de_professor hr_osoblje n 4.88
de_füttern hr_gladovati v 0.0
hr_skup de_fest n 0.38
de_königin hr_kraljevstvo n 0.0
de_stickstoff hr_vodik n 0.0
de_konversation hr_komunikacija n 5.75
de_mörder hr_ubojica n 5.38
hr_labud de_tier n 6.0
hr_klavir de_instrument n 6.0
hr_slovo de_symbol n 5.75
de_wunde hr_ozljeda n 5.25
de_horn hr_bik n 0.0
de_ereignis hr_posteljina n 0.0
de_schlucken hr_prodavati v 0.0
hr_pridjev de_verb n 0.25
hr_keks de_zitrusgewächs n 0.0
hr_jetra de_biologe n 0.0
hr_brašno de_teig n 0.0
hr_ručak de_frühstück n 0.13
hr_žlica de_gabel n 0.0
hr_najlon de_baumwolle n 0.0
de_abschleppen hr_reći v 0.13
hr_podijeliti de_hinzufügen v 0.13
de_enzyklopädie hr_knjiga n 5.75
de_schraube hr_čavao n 0.0
hr_vrlina de_qualität n 4.5
de_limonade hr_tekućina n 6.0
hr_kolačić de_lebensmittel n 5.5
hr_društvo de_menschen n 0.5
de_fledermaus hr_životinja n 6.0
de_blume hr_orhideja n 0.0
hr_odreći_se de_schütteln v 0.0
hr_rima de_abendessen n 0.0
hr_truba de_instrument n 6.0
hr_rajčica de_gemüse n 3.38
hr_atmosfera de_mörder n 0.0
de_geschichte hr_dragulj n 0.0
hr_brat de_familie n 4.0
de_beschädigung hr_šteta n 4.63
hr_obrazovati de_lehren v 3.5
de_lippe hr_jezik n 0.0
hr_prevrnuti de_verteidigen v 0.13
de_gegenmittel hr_lijek n 5.63
hr_osoba de_inhaber n 0.0
hr_motocikl de_fahrrad n 0.63
hr_večera de_mahlzeit n 5.88
de_vater hr_sin n 0.75
de_lebensmittel hr_kobasica n 0.0
hr_vrištati de_sprechen v 3.75
de_zahlung hr_stanarina n 0.13
de_mauer hr_soba n 0.0
hr_ubiti de_ersticken v 0.0
de_see hr_voda n 4.88
de_kühlschrank hr_lopta n 0.0
hr_tunel de_passage n 4.75
de_auto hr_vozilo n 5.94
de_person hr_izdavač n 0.0
de_verschmutzung hr_čamac n 0.0
hr_čekić de_krebs n 0.0
de_geduld hr_nestrpljenje n 0.0
de_poesie hr_proza n 0.13
hr_lord de_dame n 0.0
hr_tipkovnica de_schreibmaschine n 0.38
de_subtraktion hr_rezidencija n 0.0
de_tier hr_zvijer n 1.13
de_teilen hr_razderati v 0.63
de_kredit hr_kupina n 0.0
de_woche hr_mjesec n 0.0
de_umarmen hr_držati v 3.25
de_falke hr_orao n 1.13
hr_odvojiti de_anfügen v 0.0
hr_tele de_tier n 6.0
hr_liječnik de_chirurg n 0.0
hr_pastuh de_stier n 0.38
hr_sjever de_süden n 0.0
de_hase hr_sinagoga n 0.0
de_penny hr_novčić n 5.38
hr_antilop de_leder n 5.63
de_etikett hr_znak n 4.0
hr_scena de_film n 0.0
de_atlas hr_knjiga n 5.13
hr_odabir de_wahl n 5.13
de_krater hr_vulkan n 0.38
hr_pobjednik de_verlierer n 0.0
hr_izračunati de_liefern v 0.38
de_matratze hr_zbrajanje n 0.0
de_puppe hr_igračka n 6.0
hr_perilica de_gerät n 5.81
de_tochter hr_sin n 0.0
de_gurt hr_grudnjak n 0.0
de_wirbelwind hr_oluja n 5.13
hr_maslina de_lebensmittel n 5.75
de_sand hr_plaža n 0.38
de_frosch hr_životinja n 6.0
de_iglu hr_koliba n 4.38
de_zeitschrift hr_knjiga n 1.25
hr_ugovor de_dokument n 5.75
de_jupiter hr_Pluton n 0.0
de_rennen hr_kontrolirati v 0.0
hr_praznovjerje de_glaube n 5.75
hr_čistač de_seife n 0.0
hr_kupus de_lebensmittel n 5.63
de_jeep hr_vozilo n 5.88
de_winter hr_period n 5.88
hr_mladoženja de_hochzeit n 0.0
hr_violina de_cello n 0.13
de_braut hr_okupljanje n 0.0
hr_toster de_gerät n 6.0
de_fuß hr_noga n 0.13
hr_metodist de_baptist n 0.0
de_essiggurke hr_hrana n 5.5
de_außenseite hr_unutra n 0.0
de_erinnern hr_pitati v 0.0
hr_razgovarati de_adressieren v 0.88
hr_leš de_thron n 0.0
hr_dojam de_handlung n 0.25
hr_zglob de_arm n 0.0
de_sturm hr_tajfun n 0.5
de_brot hr_nogomet n 0.0
hr_uzdići de_erheben v 3.63
de_pfad hr_leopard n 0.0
hr_kornjača de_tier n 6.0
de_paradies hr_nebo n 2.38
hr_žena de_kunst n 0.25
hr_kobra de_schlange n 5.88
hr_zamrzivač de_kühlschrank n 3.5
de_idee hr_prijedlog n 1.63
de_schreiber hr_osoba n 5.5
hr_stručnost de_krieg n 0.0
hr_hrvanje de_sport n 5.63
hr_sukob de_krieg n 0.75
hr_magla de_wolke n 3.38
de_familie hr_dom n 1.38
de_einrasten hr_iskočiti v 0.38
hr_neprijatelj de_gegner n 4.75
de_entdecken hr_pronaći v 4.38
hr_lakat de_gelenk n 5.5
hr_pećnica de_gerät n 5.88
de_sirene hr_signal n 5.38
de_leitartikel hr_novine n 0.13
hr_obrok de_stift n 0.0
de_schwan hr_životinja n 6.0
hr_potok de_strom n 4.63
hr_krafna de_lebensmittel n 5.63
de_getränk hr_tonik n 0.0
hr_svjetiljka de_tisch n 0.0
de_metzger hr_pekar n 0.0
de_gänserich hr_ptica n 5.5
hr_sposobnost de_führung n 0.38
de_braut hr_vjenčanje n 0.0
hr_kruh de_sandwich n 0.0
de_lilie hr_biljka n 5.75
hr_nakit de_ohrring n 0.0
hr_kraljica de_dusche n 0.0
de_steppdecke hr_pokrivač n 6.0
hr_sjekirica de_axt n 5.63
hr_oružje de_feuerwaffe n 0.13
hr_labud de_ausflug n 0.0
de_feige hr_hrana n 5.63
hr_madrac de_bett n 1.5
de_eingestehen hr_kupiti v 0.0
de_metall hr_društvo n 0.13
de_akzeptieren hr_poreći v 0.0
de_glaube hr_religija n 0.88
hr_erodirati de_necken v 0.0
hr_balerina de_tänzer n 5.88
hr_izblijediti de_verschwinden v 4.88
de_zucchini hr_hrana n 5.75
de_kupfer hr_novčanik n 0.0
hr_sok de_getränk n 6.0
de_recyceln hr_baciti v 0.25
hr_sljedbenik de_führer n 0.13
hr_zec de_tier n 6.0
de_ehe hr_ritual n 2.88
hr_sardina de_lebensmittel n 5.38
hr_pustinja de_oase n 0.0
hr_novčić de_brieftasche n 0.0
hr_prst de_daumen n 0.0
hr_gripa de_krankheit n 6.0
hr_odred de_gruppe n 5.25
hr_rog de_instrument n 6.0
hr_kaciga de_tasche n 0.0
hr_mjerač de_maß n 0.5
de_schüssel hr_kuglanje n 0.0
hr_dagnja de_meeresfrüchte n 5.25
hr_tenor de_verlierer n 0.0
de_hammer hr_rak n 0.0
hr_sotona de_teufel n 5.25
de_präsident hr_vođa n 5.5
hr_trošarina de_mwst n 4.5
hr_proizvod de_hafen n 0.0
de_rettich hr_mrkva n 0.38
hr_bolest de_gesundheit n 0.31
hr_guverner de_politiker n 5.5
hr_pingvin de_vogel n 5.38
hr_pljačkaš de_bandit n 4.25
hr_misija de_aufgabe n 4.88
hr_orada de_fisch n 6.0
de_gast hr_osoba n 4.63
de_abwesenheit hr_medicina n 0.0
de_kader hr_tim n 5.75
de_maut hr_pristojba n 6.0
hr_rudar de_arbeitnehmer n 5.63
hr_traktor de_fahrzeug n 6.0
hr_lopatica de_utensil n 5.5
de_mob hr_skupina n 5.13
hr_osa de_biene n 0.13
hr_simptom de_krankheit n 0.75
de_sagen hr_svjedočiti v 1.0
de_krankheit hr_zdravlje n 0.31
hr_crtež de_skizze n 0.0
de_tor hr_izlaz n 3.88
hr_čovjekoliki_majmun de_säugetier n 6.0
de_schauen hr_vrednovati v 0.5
hr_idol de_schwert n 0.0
de_töten hr_ugušiti v 0.0
de_reisen hr_autostopirati v 0.0
hr_preraditi de_verschwenden v 0.25
hr_mrkva de_lebensmittel n 5.88
de_räuber hr_tama n 0.0
de_kaiser hr_vladar n 5.88
hr_kći de_kind n 5.88
hr_sačuvati de_behalten v 4.13
de_feuerstelle hr_dimnjak n 0.38
de_waschbär hr_životinja n 6.0
hr_tenor de_bass n 0.0
de_pflanze hr_repa n 0.0
hr_imenica de_verb n 0.0
de_mama hr_roditelj n 5.88
hr_orah de_baum n 6.0
hr_brašno de_brot n 0.0
de_amateur hr_stručnjak n 0.38
hr_skladište de_lager n 5.75
de_verkäufer hr_osoba n 5.88
de_kalbfleisch hr_meso n 6.0
hr_signal de_stopplicht n 0.25
de_haut hr_kosa n 0.13
de_produzent hr_tvorac n 5.38
hr_dupin de_fisch n 1.5
de_dame hr_dvorac n 0.0
de_stern hr_galaksija n 0.13
hr_stopalo de_bein n 0.13
de_bekanntmachung hr_poruka n 3.5
de_hohlraum hr_štakor n 0.0
de_mischen hr_stopiti v 2.38
de_strumpf hr_najlonka n 0.0
de_bruder hr_sestra n 0.0
de_verlassen hr_kontrolirati v 0.13
de_spatel hr_oruđe n 5.5
hr_tikvica de_lebensmittel n 5.75
de_trompete hr_instrument n 6.0
hr_ružičasta de_lila n 0.25
de_gewinnen hr_prasnuti v 0.0
hr_košulja de_mikroskop n 0.0
de_unschuld hr_grožđe n 0.0
de_pkw hr_automobil n 5.88
hr_gorila de_primat n 5.63
de_linie hr_mast n 0.0
de_blüte hr_klokan n 0.0
hr_želudac de_abdomen n 0.5
hr_podjela de_gruppe n 0.0
hr_zmija de_tier n 5.88
de_treiber hr_truba n 0.0
de_erröten hr_razjasniti v 0.0
hr_buba de_insekt n 6.0
hr_lav de_tiger n 0.0
de_sohn hr_kćer n 0.0
hr_peta de_fuß n 0.13
hr_pričvrstiti de_verbinden v 4.0
de_sauerstoff hr_voda n 0.13
hr_puding de_dessert n 5.88
hr_sisavac de_delphin n 0.0
de_handgelenk hr_ruka n 0.0
de_aktivität hr_hobi n 0.38
de_lutscher hr_slatkiš n 5.88
hr_atletičar de_sportler n 6.0
hr_iščeznuti de_verblassen v 1.0
de_nummer hr_osam n 0.0
hr_alt de_tenor n 0.0
hr_janje de_schaf n 4.75
de_schwingen hr_postaviti v 0.0
de_stichwort hr_trag n 3.0
hr_poraziti de_verzichten v 0.0
de_bart hr_koza n 0.0
hr_uš de_insekt n 6.0
hr_stotina de_nummer n 6.0
de_nelke hr_biljka n 5.75
hr_grožđe de_extremität n 0.0
hr_grančica de_ast n 5.25
de_merkmal hr_lice n 0.0
hr_regija de_partner n 0.0
de_schauen hr_škiljiti v 0.5
de_garnele hr_plodovi_mora n 6.0
de_seebarsch hr_riba n 6.0
de_verzichten hr_tresti v 0.0
hr_golf de_spiel n 5.63
de_verfassung hr_dokument n 5.25
de_horn hr_automobil n 0.0
de_zustimmung hr_klupa n 0.0
de_reiten hr_hodati v 0.25
de_fehler hr_neuspjeh n 2.0
hr_radost de_trauer n 0.0
de_ellbogen hr_zglob n 5.5
de_mutter hr_odrasla_osoba n 5.13
de_bein hr_stolica n 0.0
de_seide hr_materijal n 5.5
hr_žeti de_bekommen v 2.63
de_fußball hr_sport n 5.63
hr_mačka de_säugetier n 6.0
de_passage hr_skakavac n 0.0
hr_odbaciti de_gehen v 0.0
de_konflikt hr_neslaganje n 5.0
hr_voziti de_gehen v 0.25
de_diamant hr_kristal n 4.63
hr_cestarina de_gebühr n 6.0
hr_tikva de_gemüse n 5.75
hr_ljuljati de_einstellen v 0.0
hr_četiri de_zwei n 0.0
de_krippe hr_liječenje n 0.0
de_wissenschaft hr_matematika n 0.0
hr_konobarica de_arbeitnehmer n 5.5
hr_dotaknuti de_klopfen v 0.13
de_teilen hr_pribaviti v 0.13
de_lehrer hr_profesionalac n 4.13
hr_novak de_anfänger n 5.25
de_vergessen hr_umanjiti v 0.88
de_schemel hr_početak n 0.0
hr_hladnjak de_gerät n 5.88
de_krokodil hr_životinja n 6.0
de_könig hr_kraljica n 0.0
de_wildleder hr_materijal n 6.0
hr_pamuk de_polyester n 0.0
hr_preurediti de_bewegen v 3.0
hr_zanat de_stricken n 0.0
de_gedicht hr_sonet n 0.0
hr_rog de_auto n 0.0
hr_papar de_salz n 0.0
hr_tkivo de_knochen n 0.0
de_kohl hr_povrće n 6.0
de_leder hr_antilop n 0.0
hr_raj de_himmel n 2.38
de_mahlzeit hr_užina n 1.13
hr_zvijezda de_schale n 0.0
hr_potpetica de_schuh n 0.38
de_klasse hr_skupina n 5.63
hr_tehničar de_arbeitnehmer n 5.75
de_stopplicht hr_signal n 4.88
de_bach hr_tok n 4.63
hr_sjesti de_liegen v 0.0
hr_korov de_pflanze n 5.5
de_westen hr_smjer n 5.75
de_kehle hr_vrat n 0.0
de_pilz hr_ljubaznost n 0.0
de_nylon hr_materijal n 5.88
hr_žaba de_tier n 6.0
de_kellnerin hr_poslužiteljica n 5.75
hr_trčati de_steuern v 0.0
hr_profesionalac de_experte n 3.75
hr_stopa de_maß n 4.75
hr_nogomet de_basketball n 0.0
hr_postupak de_träne n 0.0
hr_kanta de_container n 4.75
hr_dijete de_familie n 2.13
hr_kanarinac de_feder n 0.0
de_gras hr_otrov n 0.63
de_meeresfrüchte hr_riba n 0.0
hr_poreći de_zerquetschen v 0.13
de_handschuh hr_rukavica_s_palcem n 0.0
de_gewehr hr_vatreno_oružje n 5.5
de_augenbraue hr_lice n 0.0
de_gans hr_životinja n 6.0
de_berühren hr_uštipnuti v 0.25
de_katze hr_sisavac n 6.0
de_wischen hr_uloviti v 0.0
hr_oboa de_instrument n 6.0
hr_slika de_fernsehen n 0.13
de_gans hr_ptica n 5.88
hr_lijek de_ursache n 0.0
hr_brat de_schwester n 0.0
de_mehl hr_kruh n 0.0
de_bauen hr_stvoriti v 4.75
hr_majka de_vater n 0.0
hr_zaudarati de_riechen v 3.25
de_kompetenz hr_rat n 0.0
de_bewegen hr_naguravati v 0.13
hr_osjećaj de_ekstase n 0.0
de_ruhesessel hr_sjedalo n 5.25
de_zerfallen hr_erodirati v 2.0
de_schlagen hr_trčati v 0.0
hr_tipkovnica de_arm n 0.0
de_beschleunigen hr_priznati v 0.0
de_verteidigung hr_napad n 0.38
de_sonett hr_pjesma n 5.5
hr_činiti de_sein v 0.88
hr_stručnost de_fähigkeit n 4.75
hr_prihvatiti de_zermalmen v 0.38
hr_nogometna_lopta de_ball n 6.0
hr_sonet de_gedicht n 5.5
hr_cvijet de_delikt n 0.0
de_schwimmen hr_trčati v 0.0
de_ehe hr_status n 3.75
de_bekommen hr_unovačiti v 1.0
hr_mit de_fiktion n 5.5
hr_otkriti de_finden v 4.38
de_gefängnis hr_zatvor n 4.5
hr_organizacija de_stiftung n 0.0
hr_odgovor de_frage n 0.25
hr_smrt de_ende n 4.5
de_herrscher hr_diktator n 0.5
hr_pogledati de_schauen v 5.75
hr_pitati de_bitten v 1.0
hr_diktator de_herrscher n 5.75
de_ahorn hr_drvo n 6.0
de_entlassen hr_otići v 0.0
de_verlies hr_dvorac n 0.63
de_wald hr_džungla n 0.0
de_pfirsich hr_voće n 6.0
de_automobil hr_vozilo n 5.0
hr_lipa de_penny n 0.0
de_minderheit hr_zahod n 0.0
de_schütteln hr_tonuti v 0.0
de_nebel hr_oblak n 3.38
hr_korov de_gift n 0.63
de_feld hr_stadion n 0.25
de_bedeutung hr_besmislica n 0.0
de_nylon hr_pamuk n 0.0
de_offizier hr_kaplar n 0.0
de_attackieren hr_ukloniti v 0.38
hr_zec de_synagoge n 0.0
hr_grlo de_hals n 0.0
hr_kirurgija de_urlaub n 0.0
de_kreuzung hr_kornjača n 0.0
de_buchstabe hr_abeceda n 0.38
hr_silovanje de_kriminalität n 5.75
de_student hr_učenik n 3.38
de_könig hr_vođa n 5.38
hr_ograničenje de_grenze n 4.5
hr_religija de_glaube n 4.75
hr_spavaćica de_unterwäsche n 3.75
hr_ekipa de_mannschaft n 5.75
de_signal hr_svjetlo n 0.25
hr_kazna de_belohnung n 0.25
hr_redovnica de_softball n 0.0
de_mythos hr_fikcija n 5.5
de_motorrad hr_vozilo n 6.0
de_prisma hr_oblik n 5.75
de_fragen hr_moliti v 1.0
hr_duga de_himmel n 0.38
de_schatten hr_svjetlo n 0.75
hr_simbol de_brief n 0.0
hr_skvoš de_sport n 6.0
de_straße hr_avenija n 0.38
hr_gozba de_versammlung n 5.0
de_floh hr_insekt n 5.88
de_traktor hr_vozilo n 6.0
hr_koža de_material n 5.88
hr_baseball de_spiel n 5.88
hr_kaciga de_schutz n 5.88
de_flügel hr_koža n 0.0
de_nachthemd hr_rublje n 3.75
de_satan hr_bog n 0.75
de_süden hr_smjer n 6.0
hr_spasiti de_abstürzen v 0.0
hr_devet de_nummer n 6.0
hr_otac de_mutter n 0.0
hr_sova de_vogel n 5.88
hr_obrana de_angriff n 0.38
de_abteilung hr_organizacija n 2.75
hr_poklopac de_kamera n 0.0
hr_povrće de_spinat n 0.0
de_maler hr_umjetnik n 5.63
hr_zavoj de_aberglaube n 0.0
hr_kaktus de_pflanze n 5.63
hr_okidač de_gewehr n 0.0
de_boden hr_pljusak n 0.0
de_kette hr_zavoj n 0.38
de_glück hr_emocija n 5.63
hr_kuk de_körper n 0.0
de_abwesenheit hr_prisutnost n 0.13
hr_makaroni de_lebensmittel n 5.63
de_lendenfilet hr_meso n 5.88
de_nehmen hr_zadržati v 0.63
hr_drvo de_pflanze n 5.63
hr_srna de_tier n 6.0
hr_naučiti de_beurteilen v 0.13
hr_dinosaur de_tier n 5.63
hr_koža de_wildleder n 0.0
hr_osoba de_bergsteiger n 0.13
de_professor hr_fakultet n 0.0
de_schulter hr_lakat n 0.0
hr_bora de_haut n 0.5
hr_majmun de_tier n 6.0
de_dinosaurier hr_životinja n 5.63
hr_životinja de_ente n 0.0
de_sonnenuntergang hr_izlazak n 0.0
hr_neprijatelj de_krokodil n 0.25
de_schloss hr_dom n 3.0
hr_izvan de_innenseite n 0.0
hr_Saturn de_planet n 5.88
hr_krug de_form n 5.5
hr_vještica de_frau n 5.38
hr_pivo de_flüssigkeit n 6.0
hr_jutro de_intelligenz n 0.0
hr_bubreg de_organ n 6.0
hr_vodik de_helium n 0.0
hr_nakit de_ring n 0.0
de_schiff hr_vozilo n 4.63
hr_plin de_auto n 0.0
hr_ideja de_vorschlag n 1.63
de_reptil hr_životinja n 5.88
hr_pita de_lebensmittel n 5.5
hr_vrat de_strom n 0.0
de_knöchel hr_noga n 0.0
hr_rukavica de_fäustling n 0.0
de_vergewaltigung hr_zločin n 5.75
de_badewanne hr_kupaonica n 0.0
de_hals hr_potok n 0.0
de_unterhalten hr_savjetovati v 0.25
hr_tekućina de_tastatur n 0.0
hr_podatak de_information n 4.5
de_vereinen hr_vjenčati v 0.38
de_papier hr_materijal n 5.75
hr_časnik de_korporal n 0.0
hr_deblo de_oase n 0.0
de_arbeitnehmer hr_mehaničar n 0.0
de_koffein hr_kava n 0.0
hr_tjedan de_jahr n 0.0
de_zerquetschen hr_demolirati v 5.0
hr_indijski_oraščić de_nuss n 6.0
hr_žumanjak de_ei n 0.13
hr_cesta de_allee n 0.38
hr_gušter de_tier n 6.0
de_leber hr_srce n 0.0
de_gegner hr_refren n 0.0
hr_graf de_diagramm n 5.0
hr_primiti de_erhalten v 4.88
de_tag hr_tjedan n 0.0
hr_princ de_kapitän n 0.63
hr_portret de_bild n 5.75
de_quiz hr_test n 4.75
hr_lik de_persönlichkeit n 2.88
hr_školjka de_meeresfrüchte n 6.0
hr_bara de_sumpf n 3.25
de_brise hr_vjetar n 5.38
de_faden hr_konop n 4.25
de_gänserich hr_biologija n 0.13
de_infinitesimalrechnung hr_trigonometrija n 0.13
de_eishockey hr_sport n 6.0
de_kanarienvogel hr_ptica n 5.88
de_olympia hr_događaj n 5.63
hr_neboder de_gebäude n 5.63
de_politik hr_vlada n 0.0
hr_slovo de_zeichen n 5.75
hr_iver de_stück n 3.75
hr_pilula de_droge n 3.0
de_herrscher hr_car n 0.0
de_erodieren hr_raspasti_se v 4.88
hr_ugrabiti de_greifen v 4.5
de_mahlzeit hr_nalivpero n 0.0
de_struktur hr_arhitektura n 0.25
hr_tretman de_medikation n 1.25
hr_parfem de_deodorant n 0.13
hr_postupak de_betrieb n 0.5
de_kalbfleisch hr_hrana n 5.38
de_krautsalat hr_salata n 5.75
hr_tkanina de_seide n 0.0
hr_promijeniti de_wechseln v 3.38
de_aberglaube hr_vjerovanje n 5.75
hr_sigurnost de_versicherung n 0.38
de_kupfer hr_mjed n 0.0
hr_plašt de_jacke n 3.0
de_ente hr_ptica n 5.63
hr_stopalo de_pflanze n 0.0
hr_kredit de_brombeere n 0.0
hr_medij de_fernsehen n 0.0
de_schlamm hr_religija n 0.0
de_abendessen hr_dinosaur n 0.0
de_märchen hr_priča n 5.88
hr_supruga de_frau n 6.0
hr_točka de_schwert n 0.0
de_kühlschrank hr_uređaj n 5.88
de_sicht hr_percepcija n 4.38
hr_prikupiti de_drehen v 0.0
de_ehefrau hr_prsten n 0.0
de_aufstieg hr_silazak n 0.25
hr_sjena de_licht n 0.75
hr_dinstati de_kochen v 5.13
hr_mač de_waffe n 5.88
hr_znanost de_mathematik n 0.0
de_baumwolle hr_poliester n 0.0
hr_popeti_se de_absteigen v 0.0
de_pilz hr_hrana n 5.25
de_bergmann hr_radnik n 5.63
hr_cent de_dollar n 0.38
de_brühe hr_juha n 5.25
hr_slikar de_künstler n 5.63
hr_političar de_gouverneur n 0.0
de_aufsteigen hr_napustiti v 0.25
hr_mačka de_tier n 6.0
hr_keks de_lebensmittel n 5.63
hr_plin de_automobil n 0.0
de_keks hr_agrum n 0.0
hr_sram de_schande n 0.63
de_kamin hr_labud n 0.0
hr_lanac de_bandage n 0.38
hr_koza de_kind n 0.0
hr_jetra de_organ n 6.0
de_fülle hr_nestašica n 0.0
de_banane hr_voće n 6.0
hr_mrav de_insekt n 5.88
hr_osoba de_herausgeber n 0.0
hr_prsa de_truthahn n 0.38
de_ziege hr_dijete n 0.0
hr_kopač de_bergmann n 1.75
hr_limuzina de_migräne n 0.0
de_kellnerin hr_radnica n 5.5
hr_početak de_ende n 0.13
hr_kukuruz de_lebensmittel n 5.75
de_pferd hr_pastuh n 0.0
de_verfahren hr_suza n 0.0
de_banjo hr_instrument n 6.0
de_volleyball hr_sport n 6.0
hr_ulica de_garnele n 0.0
hr_obitelj de_zuhause n 1.38
de_schreiber hr_račun n 0.0
hr_tuča de_regen n 2.13
hr_pokazati de_sagen v 0.75
hr_gljiva de_freundlichkeit n 0.0
de_aufzug hr_zgrada n 0.0
hr_bakar de_messing n 0.0
hr_riba de_seebarsch n 0.0
hr_med de_zucker n 1.25
hr_hihotati_se de_lachen v 5.5
hr_svemir de_welt n 1.25
de_macht hr_gravitacija n 0.0
hr_napredovati de_rückziehen v 0.13
de_trauer hr_radost n 0.0
de_beobachten hr_preplanuti v 0.0
de_gasse hr_ulica n 5.63
hr_bujon de_brühe n 5.63
de_feder hr_flota n 0.0
de_kaffee hr_mlijeko n 0.0
hr_šljunak de_stein n 5.25
hr_piće de_bier n 0.0
hr_operacija de_geist n 0.0
de_ziffer hr_broj n 3.75
de_fachmann hr_profesor n 0.5
de_freund hr_djevojka n 0.25
hr_presuda de_beurteilung n 2.0
de_kirsche hr_grožđe n 0.0
de_erschlagen hr_ubiti v 5.5
hr_doći de_verlassen v 0.13
hr_izračunati de_kalkulieren v 4.88
de_geschwister hr_obitelj n 4.0
de_ziehen hr_gurnuti v 0.38
de_verschleiern hr_sakriti v 4.63
de_dunkelheit hr_flanel n 0.0
de_forelle hr_riba n 6.0
hr_kruh de_lebensmittel n 6.0
hr_glava de_stift n 0.0
hr_ekstremitet de_bein n 0.0
de_partei hr_skupina n 4.5
hr_vijak de_nagel n 0.0
hr_dodati de_subtrahieren v 0.13
de_pasta hr_salata n 0.38
hr_šest de_nummer n 6.0
hr_povjetarac de_wind n 5.38
de_fleisch hr_čovjek n 0.0
de_kochen hr_spaliti v 0.0
de_zuhause hr_palača n 0.13
hr_plavo de_farbe n 6.0
hr_zmija de_schwäche n 0.0
hr_vrana de_vogel n 6.0
hr_anatomija de_mensch n 0.0
de_geschichte hr_pripovijest n 4.88
de_hexe hr_žena n 5.38
hr_uzdizati_se de_verlassen v 0.25
de_ermöglichen hr_vratiti v 0.0
de_zehennagel hr_prst n 0.0
hr_nesposobnost de_fähigkeit n 0.0
hr_grickati de_kauen v 4.0
hr_dizalo de_gebäude n 0.0
de_schraubendreher hr_čekić n 0.0
hr_stopa de_zoll n 0.25
de_krebs hr_bolest n 5.75
de_tomate hr_povrće n 3.38
hr_limeta de_obst n 5.88
de_schwimmen hr_tonuti v 0.38
hr_jecati de_weinen v 4.0
hr_pjesma de_sonett n 0.0
de_bein hr_bedro n 0.38
hr_izumiti de_machen v 3.63
hr_nezaposlenost de_beschäftigung n 0.13
hr_saksofon de_instrument n 6.0
de_beil hr_sjekira n 5.63
hr_odgoditi de_zeigen v 0.0
de_sprechen hr_komunicirati v 5.63
de_dolch hr_oružje n 5.63
de_kürbis hr_značenje n 0.0
de_gemälde hr_perilica n 0.0
de_entwickeln hr_naučiti v 2.25
hr_karfiol de_brokkoli n 0.25
de_mahlzeit hr_večera n 0.0
de_seide hr_tkanina n 5.75
de_chemie hr_nož n 0.0
hr_hrabrost de_streugut n 0.5
de_pistole hr_oružje n 6.0
de_gegend hr_područje n 4.25
hr_grašak de_lebensmittel n 5.63
hr_lipa de_nickel n 0.5
de_teilnahme hr_izgled n 0.0
hr_grgeč de_fisch n 6.0
hr_ustav de_dokument n 5.25
hr_nokat de_zehe n 0.0
hr_golubica de_vogel n 6.0
hr_limuzina de_fahrzeug n 5.88
de_quadrat hr_oblik n 6.0
de_schublade hr_škrinja n 0.13
hr_blato de_religion n 0.0
hr_sporazum de_bank n 0.0
de_knöchel hr_prst n 0.25
hr_pecivo de_lebensmittel n 5.75
hr_oružje de_schwert n 0.0
hr_tekućina de_substanz n 5.25
de_tugend hr_pejzaž n 0.0
hr_kokoš de_hähnchen n 0.13
hr_kolijevka de_krippe n 0.88
hr_kupac de_person n 4.88
de_marmor hr_kamen n 5.63
hr_posuditi de_stören v 0.0
de_hüfte hr_tijelo n 0.0
de_aufsatz hr_odlomak n 0.0
hr_pluća de_organ n 6.0
de_lehm hr_posuđe n 0.0
hr_crijevo de_leber n 0.0
de_heuhaufen hr_pobjednik n 0.0
de_erheben hr_pasti v 0.0
de_wasser hr_tvar n 5.63
de_beraten hr_razgovarati v 3.5
de_wal hr_sisavac n 5.88
hr_aleja de_straße n 5.38
de_skalpell hr_instrument n 5.25
de_kopf hr_igla n 0.0
de_pferd hr_sisavac n 6.0
hr_sisavac de_elefant n 0.0
hr_oblik de_prisma n 0.0
de_feder hr_ptica n 0.0
hr_riža de_lebensmittel n 5.88
de_idol hr_osoba n 3.88
de_fisch hr_ventil n 0.0
hr_trans de_zustand n 5.63
de_entwerfen hr_crtati v 1.63
de_ameisenbär hr_životinja n 5.88
de_punkt hr_igla n 0.0
de_leopard hr_tigar n 0.13
hr_obmana de_betrug n 5.5
de_öffnung hr_ulaz n 2.25
hr_mačka de_aussehen n 0.13
hr_ladica de_büro n 0.0
hr_prsten de_schmuck n 6.0
hr_predak de_vater n 0.13
hr_dotaknuti de_greifen v 0.25
de_saturn hr_Venera n 0.0
de_mutter hr_žena n 5.5
de_geweih hr_jelen n 0.0
hr_oklop de_schildkröte n 0.0
hr_igračka de_spielzeug n 5.63
de_gangster hr_banda n 0.13
hr_trombon de_instrument n 6.0
hr_obrok de_abendessen n 0.0
hr_plast de_gewinner n 0.0
de_krabbe hr_životinja n 6.0
de_stock hr_stabljika n 0.0
hr_ulica de_weg n 5.38
hr_ubojica de_dieb n 1.25
hr_službenik de_infinitesimalrechnung n 0.0
hr_zadirkivati de_ausführen v 0.5
de_tastatur hr_pisaći_stroj n 0.38
de_onkel hr_tetka n 0.13
hr_razumjeti de_bewerten v 0.0
hr_vrhunac de_geschichte n 0.0
hr_sposobnost de_stärke n 2.63
de_krug hr_spremnik n 4.13
hr_ujediniti de_heiraten v 0.38
de_limit hr_granica n 4.5
hr_zub de_säge n 0.38
de_integrität hr_radnik n 0.0
de_bewegung hr_aktivnost n 5.38
hr_zadovoljstvo de_schmerzen n 0.0
hr_tuljan de_säugetier n 5.75
de_ofen hr_štednjak n 0.63
hr_natjecanje de_taschenrechner n 0.13
de_offizier hr_policija n 0.88
hr_crtati de_erstellen v 3.25
hr_hipoteza de_schwimmbad n 0.0
de_ehefrau hr_umjetnost n 0.25
hr_Azija de_afrika n 0.0
hr_krivnja de_unschuld n 0.0
hr_ekstaza de_gefühl n 5.5
de_diamant hr_biser n 0.38
hr_pobjeći de_rennen v 2.0
hr_voće de_kirsche n 0.0
de_helm hr_džep n 0.0
de_verräter hr_lopov n 0.75
de_hecht hr_riba n 6.0
de_leder hr_materijal n 5.88
hr_pingvin de_tier n 6.0
hr_pomoći de_hinzufügen v 0.25
de_scham hr_sramota n 0.63
hr_zadaća de_arbeit n 3.88
de_entfrosten hr_rastopiti v 3.88
hr_škamp de_meeresfrüchte n 6.0
hr_sastanak de_konferenz n 0.38
hr_roman de_fiktion n 3.0
de_extremität hr_noga n 0.0
hr_princeza de_königtum n 0.5
de_radio hr_medij n 6.0
hr_stvorenje de_wolf n 0.0
de_baseball hr_igra n 5.88
de_rühren hr_skrenuti v 0.75
hr_brkovi de_haar n 3.0
hr_lisičine de_ärmel n 0.0
de_dämmerung hr_zalazak n 1.25
de_tenor hr_gubitnik n 0.0
hr_stroj de_computer n 0.0
de_finger hr_rukavica n 0.13
de_daten hr_informacija n 4.5
hr_zaštita de_helm n 0.0
de_straße hr_autocesta n 1.25
hr_trigonometrija de_algebra n 0.38
hr_bajka de_geschichte n 5.88
hr_prtljažnik de_auto n 0.0
hr_tuljan de_drachen n 0.0
de_halten hr_čekati v 0.88
hr_grašak de_gemüse n 6.0
de_kochen hr_zamrznuti v 0.0
de_milch hr_tekućina n 5.88
hr_kamen de_schmuck n 1.75
hr_košarka de_sport n 6.0
de_kind hr_kćer n 0.0
hr_prijatelj de_partner n 4.5
de_nase hr_lice n 0.0
hr_trkač de_athlet n 5.88
de_botschaft hr_bilješka n 3.25
de_kugel hr_globus n 0.0
hr_lisica de_tier n 6.0
hr_narukvica de_halskette n 0.5
hr_posao de_aktivität n 4.63
hr_sisavac de_katze n 0.0
hr_krađa de_zusatz n 0.0
hr_fitilj de_kerze n 0.0
hr_tikva de_bedeutung n 0.0
de_ellbogen hr_ruka n 0.13
hr_dlijeto de_werkzeug n 5.75
de_gedanke hr_vjerovanje n 0.88
hr_krilo de_engel n 0.0
de_berühren hr_pogladiti v 0.13
de_tochter hr_dijete n 5.88
hr_krevet de_möbel n 6.0
hr_breskva de_obst n 6.0
hr_ubrzati de_bauen v 0.0
de_kofferraum hr_oaza n 0.0
de_reiniger hr_sapun n 0.0
de_weste hr_džemper n 0.5
de_held hr_zlikovac n 0.13
de_beerdigung hr_ceremonija n 5.38
de_ohr hr_glava n 0.38
de_delphin hr_riba n 1.5
de_ruhesessel hr_namještaj n 5.75
de_bewegen hr_ostati v 0.0
hr_smog de_leistung n 0.0
de_brust hr_purica n 0.38
hr_pramac de_hafen n 0.0
hr_ukloniti de_bewegen v 3.5
hr_doba de_zeit n 4.63
de_kies hr_kamen n 5.25
hr_stvorenje de_insekt n 0.0
de_methodist hr_baptist n 0.0
de_insekt hr_komarac n 0.0
hr_saksofon de_behandlung n 0.0
de_lkw hr_vozilo n 6.0
de_streiken hr_promašiti v 0.0
de_räuber hr_odmetnik n 4.25
hr_umiriti de_trösten v 2.38
de_abfahren hr_stići v 0.38
de_rubin hr_kristal n 5.63
de_schnappen hr_zgrabiti v 4.5
de_wolkenkratzer hr_sastanak n 0.0
de_gefühl hr_tjeskoba n 0.0
de_rede hr_jezik n 2.38
hr_crijevo de_bauch n 0.0
de_kopfschmerzen hr_simptom n 5.13
de_hohlraum hr_zub n 0.0
hr_biologija de_wissenschaft n 6.0
de_vorlesung hr_razred n 0.0
hr_rastaviti de_brennen v 0.25
hr_amater de_himmel n 0.0
hr_uređaj de_telefon n 0.0
de_olive hr_hrana n 5.75
de_wettbewerb hr_utrka n 0.5
de_palast hr_dom n 3.5
de_politiker hr_senator n 0.13
hr_usna de_mund n 0.0
de_entschuldigen hr_uvjeriti v 0.0
hr_šupljina de_zahn n 0.0
hr_mora de_traum n 5.88
de_verkaufen hr_potvrditi v 0.25
de_basketball hr_sport n 6.0
de_erdnuss hr_indijski_oraščić n 0.0
de_mund hr_lice n 0.0
de_dachboden hr_kuća n 0.63
de_dachgeschoss hr_kuća n 0.38
hr_aligator de_reptil n 6.0
de_mädchen hr_osoba n 6.0
hr_koža de_gewebe n 5.38
hr_komarac de_insekt n 6.0
hr_more de_wasser n 5.5
hr_oduzeti de_multiplizieren v 0.0
de_villa hr_dom n 2.88
de_joghurt hr_hrana n 5.75
hr_odlediti de_auftauen v 3.88
de_stinken hr_mirisati v 3.25
hr_iskrenost de_ehrlichkeit n 4.75
hr_razmišljanje de_gedanke n 2.25
hr_cement de_stein n 1.25
de_vergnügen hr_bol n 0.0
de_ringen hr_sport n 5.63
hr_poremećaj de_auftrag n 0.25
hr_greška de_versagen n 2.0
de_straße hr_bulevar n 0.5
de_verzögern hr_žuriti v 0.0
de_verweigern hr_odbaciti v 3.88
de_zeitung hr_časnik n 0.0
hr_zanimanje de_job n 2.88
de_tier hr_slon n 0.0
hr_živcirati de_necken v 3.0
hr_tajfun de_sturm n 5.5
de_schale hr_kornjača n 0.0
de_sicherheit hr_osiguranje n 0.38
de_laden hr_dućan n 5.63
de_aufrichtigkeit hr_poštenje n 4.75
hr_ovratnik de_hals n 0.0
hr_aritmetika de_kopfsalat n 0.0
de_wasser hr_zrak n 0.0
hr_nula de_nummer n 5.75
hr_krater de_vulkan n 0.38
hr_najlon de_material n 5.88
hr_torbica de_schüssel n 0.0
hr_povrće de_tomate n 0.0
hr_faza de_räuber n 0.0
hr_orhideja de_pflanze n 6.0
de_bewegen hr_tegliti v 0.5
de_grippe hr_bolest n 6.0
hr_svila de_baumwolle n 0.0
hr_učitelj de_fachmann n 4.13
de_möbel hr_krevet n 0.0
de_globus hr_sfera n 5.0
de_gruppe hr_legija n 0.0
de_bouillon hr_juha n 5.63
de_gerät hr_kralježnica n 0.0
hr_peraja de_fisch n 0.0
hr_tkivo de_brücke n 0.0
de_mandarine hr_voće n 6.0
de_direktor hr_nadglednik n 5.13
de_job hr_aktivnost n 4.63
hr_uništiti de_schmecken v 0.0
de_sagen hr_preporučiti v 0.25
hr_stuba de_treppe n 0.5
hr_leđa de_körper n 0.0
de_abhilfe hr_uzrok n 0.0
de_fisch hr_morski_pas n 0.0
de_kuh hr_životinja n 6.0
de_frieden hr_rat n 0.0
de_ring hr_nakit n 6.0
hr_palac de_finger n 5.5
hr_integritet de_ehrlichkeit n 3.13
de_sammeln hr_zavrtiti v 0.0
de_elternteil hr_predak n 5.5
hr_profesor de_fachmann n 5.0
de_sitz hr_tron n 0.5
hr_poručnik de_mut n 0.0
hr_cilj de_erfolg n 0.38
de_alkohol hr_supstanca n 5.25
de_geldbörse hr_konobar n 0.0
hr_čili de_lebensmittel n 4.5
de_prinzessin hr_princ n 0.0
de_löwe hr_tigar n 0.0
de_verzögern hr_pokazati v 0.0
de_brieftasche hr_aktovka n 0.88
de_toaster hr_uređaj n 6.0
de_beibehalten hr_zadržati v 4.13
de_erfinden hr_napraviti v 3.63
hr_tjedan de_anfang n 0.0
hr_odrastao de_kind n 0.88
hr_supružnik de_ehe n 0.0
de_tochter hr_žensko n 5.25
hr_napad de_überfallen v 2.5
de_substantiv hr_pridjev n 0.0
hr_lijek de_tablette n 0.0
de_nussbaum hr_stablo n 6.0
de_stiftung hr_organizacija n 5.0
hr_baterija de_agentur n 0.0
hr_džin de_alkohol n 5.88
hr_otac de_vorfahr n 5.5
de_mikroskop hr_teleskop n 0.0
de_skizze hr_crtež n 5.88
hr_tanjur de_löffel n 0.0
hr_pogreška de_herrscher n 0.0
hr_hrast de_kiefer n 0.0
hr_pločnik de_gehweg n 5.75
de_mehl hr_vjenčanje n 0.0
hr_reći de_bezeugen v 1.0
hr_autostopirati de_reisen v 4.63
de_dom hr_građevina n 6.0
hr_tavan de_haus n 0.63
hr_amater de_besitz n 0.0
de_buch hr_enciklopedija n 0.0
hr_maturalna de_party n 5.63
de_stinktier hr_životinja n 5.75
hr_top de_gewehr n 0.13
hr_pogubiti de_töten v 5.5
de_vorrücken hr_povlačiti_se v 0.13
de_softball hr_nogomet n 0.0
de_wüste hr_oaza n 0.0
de_bier hr_piće n 6.0
hr_jezgra de_atom n 0.38
de_flamme hr_zadovoljstvo n 0.13
hr_umjetnost de_skulptur n 0.13
hr_telefon de_gerät n 5.88
de_hagel hr_kiša n 2.13
de_honig hr_šećer n 1.25
hr_dagnja de_jakobsmuschel n 0.0
de_kobra hr_zmija n 5.88
de_arbeitnehmer hr_stolar n 0.13
de_lippenstift hr_klasa n 0.0
de_schwester hr_sestrinstvo n 0.0
de_schatulle hr_kutija n 5.38
de_wasserstoff hr_helij n 0.0
hr_časopis de_buch n 1.25
de_anweisen hr_obavijestiti v 2.63
hr_gnjaviti de_zählen v 0.0
hr_vrednovati de_beurteilen v 4.38
hr_arhitektura de_wasser n 0.0
hr_dušik de_wasserstoff n 0.0
de_ort hr_područje n 3.75
de_wal hr_kriket n 0.0
hr_karavan de_fahrzeug n 5.63
hr_plivati de_laufen v 0.0
de_motorrad hr_bicikl n 0.63
hr_cesta de_autobahn n 1.25
hr_izgraditi de_brechen v 0.0
hr_prsluk de_sweatshirt n 0.5
de_gerät hr_telefon n 0.0
de_wahrnehmung hr_vid n 0.63
hr_galeb de_vogel n 6.0
hr_pila de_werkzeug n 6.0
de_höhepunkt hr_priča n 0.0
de_feier hr_događaj n 5.75
hr_mravojed de_tier n 5.88
de_schweinefleisch hr_meso n 5.88
de_teilen hr_dodati v 0.13
de_feder hr_dikobraz n 0.0
hr_nevinost de_traube n 0.0
hr_kemičar de_wissenschaftler n 5.63
de_gesellschaft hr_skupina n 4.0
de_truthahn hr_ptica n 5.75
de_eigelb hr_jaje n 0.13
de_moschus hr_miris n 5.0
de_sellerie hr_povrće n 6.0
hr_zid de_abteilung n 0.0
de_gefühl hr_ljubomora n 0.0
hr_mandarina de_kern n 0.0
de_tante hr_planet n 0.0
hr_čovjek de_enzyklopädie n 0.25
hr_kuhati de_dünsten v 0.0
de_hacke hr_stopalo n 0.13
hr_maslina de_essiggurke n 0.0
hr_nadvladati de_verärgern v 0.63
de_chor hr_pjesma n 0.13
de_person hr_vlasnik n 0.0
de_stoff hr_pamuk n 0.0
hr_događaj de_leinen n 0.0
de_erwachsene hr_dijete n 0.88
de_aufgabe hr_posao n 2.0
de_tasse hr_spremnik n 3.5
de_eingestehen hr_poreći v 0.0
de_kümmern hr_računati v 0.0
hr_greben de_gipfel n 1.88
hr_braniti de_schützen v 4.75
de_tier hr_gmaz n 0.13
de_gewebe hr_kost n 0.0
de_material hr_koža n 0.0
hr_potkrovlje de_haus n 0.38
de_zeigen hr_ujediniti v 0.0
de_morgen hr_jučer n 0.38
de_ente hr_životinja n 6.0
de_sichel hr_alat n 5.88
hr_deterdžent de_reiniger n 4.88
de_schriftsteller hr_pjesnik n 0.38
hr_uragan de_sturm n 5.38
de_glied hr_drvo n 0.0
hr_staza de_leopard n 0.0
hr_prijelaz de_schildkröte n 0.0
de_gras hr_biljka n 5.5
de_begriff hr_ustav n 0.0
hr_šunka de_fleisch n 5.88
hr_zima de_sommer n 0.0
hr_stroj de_gewürz n 0.0
de_knochen hr_čeljust n 0.0
de_beere hr_trešnja n 0.0
de_reich hr_kraljevstvo n 1.88
de_ziel hr_uspjeh n 0.38
de_schwan hr_putovanje n 0.0
de_jakobsmuschel hr_hrana n 4.88
hr_toksin de_gift n 6.0
de_rettich hr_povrće n 6.0
hr_baseball de_sport n 6.0
hr_sutra de_gestern n 0.38
hr_stado de_gruppe n 5.5
de_schemel hr_zahod n 0.0
hr_ormar de_zimmer n 0.0
hr_klub de_organisation n 5.38
de_gewinner hr_gubitnik n 0.0
de_winter hr_ljeto n 0.0
hr_breskva de_birne n 0.0
de_eiweiß hr_meso n 0.0
de_gelübde hr_obećanje n 5.63
hr_kapacitet de_grenze n 3.38
de_video hr_televizija n 0.13
hr_konferencija de_treffen n 4.5
hr_orao de_vogel n 6.0
de_erwiederung hr_odgovor n 4.5
de_erdbeere hr_voće n 6.0
hr_bilten de_botschaft n 3.5
hr_guska de_truthahn n 0.38
de_stuhl hr_klupa n 0.63
de_flüstern hr_razgovarati v 4.88
hr_princeza de_vermögen n 0.0
de_priester hr_rabin n 0.5
hr_rame de_ellbogen n 0.0
hr_znanost de_geologie n 0.0
hr_geometrija de_mathematik n 5.75
de_acht hr_broj n 6.0
hr_vile de_werkzeug n 5.63
hr_prihvatiti de_verweigern v 0.0
de_zeichnung hr_skica n 0.0
hr_pamuk de_stoff n 5.25
de_beschleunigen hr_izgraditi v 0.0
hr_kanta de_fass n 0.75
de_saxophon hr_instrument n 6.0
de_woche hr_godina n 0.0
de_gelenk hr_lakat n 0.0
hr_glavobolja de_symptom n 5.13
hr_odaziv de_antwort n 4.5
hr_porcija de_menge n 5.0
de_vermählen hr_oženiti_se v 3.25
hr_skica de_zeichnung n 5.88
de_reizen hr_potrošiti v 0.25
hr_buha de_insekt n 5.88
hr_prsluk de_hemd n 0.0
de_kamerad hr_brak n 0.25
hr_gusak de_vogel n 5.5
hr_peta de_stiefel n 0.0
hr_ruka de_extremität n 5.5
hr_oduzimanje de_villa n 0.0
de_fuß hr_biljka n 0.0
hr_tama de_flanell n 0.0
hr_životinja de_elefant n 0.0
de_limonade hr_piće n 6.0
de_ablösen hr_pričvrstiti v 0.0
de_eindruck hr_čin n 0.25
hr_novine de_offizier n 0.0
de_zeitraum hr_pubertet n 0.0
hr_tipkovnica de_klavier n 0.25
hr_dijete de_tochter n 0.0
de_erdferkel hr_životinja n 5.88
de_ufer hr_plaža n 0.38
de_sprechen hr_vrištati v 0.25
hr_glava de_schwanz n 0.0
hr_poučiti de_informieren v 2.63
hr_ceremonija de_beerdigung n 0.0
hr_strah de_tenor n 0.0
de_morgen hr_noć n 0.0
hr_kraljica de_königtum n 0.0
hr_jesen de_jahreszeit n 5.88
de_schach hr_igra n 5.88
hr_dijamant de_kristall n 4.63
hr_trauma de_verletzung n 4.75
de_scheitern hr_operirati v 0.25
hr_zdrobiti de_zerstören v 5.0
hr_prihvatiti de_wiederherstellen v 0.13
de_sprechen hr_kucati v 0.0
de_schreibmaschine hr_stroj n 5.75
de_säugetier hr_dupin n 0.0
hr_salata de_lebensmittel n 5.63
de_trennen hr_podijeliti v 2.88
de_zehncentstück hr_peni n 0.0
hr_mjesec de_jahr n 0.25
de_werfer hr_hvatač n 0.13
de_besetzung hr_pokazati v 0.0
hr_odbojka de_spiel n 5.63
de_miete hr_uplata n 3.88
de_kreis hr_oblik n 5.5
hr_guska de_vogel n 5.88
de_stern hr_ljuska n 0.0
hr_ljiljan de_pflanze n 5.75
de_amateur hr_raj n 0.0
hr_bačvica de_container n 5.0
de_verändern hr_zamijeniti v 3.38
hr_limun de_obst n 5.88
de_armee hr_demokracija n 0.0
de_glas hr_ormar n 0.0
de_redner hr_pakao n 0.0
de_brechen hr_zdrobiti v 0.38
de_snack hr_obrok n 5.75
hr_obećanje de_steigen v 0.0
de_junge hr_dijete n 5.56
hr_slap de_tennis n 0.0
hr_uređaj de_geschirrspüler n 0.0
hr_džungla de_wald n 5.5
hr_rebro de_tier n 0.0
de_beschäftigung hr_posao n 3.75
de_menge hr_količina n 4.63
hr_nokat de_finger n 0.0
hr_unija de_gruppe n 4.38
de_vier hr_broj n 5.75
hr_metar de_einheit n 5.75
de_verschwinden hr_izblijediti v 1.0
de_behandlung hr_terapija n 3.63
hr_skupina de_legion n 0.0
hr_slabost de_stärke n 0.38
hr_predavanje de_klasse n 0.0
hr_prositi de_schlucken v 0.0
de_ohr hr_zaposlenik n 0.0
hr_ruž de_klasse n 0.0
de_reminiszenz hr_sjećanje n 5.0
hr_losos de_fisch n 5.88
de_urteil hr_osuda n 2.0
hr_atom de_mythologie n 0.0
de_instrument hr_gitara n 0.0
hr_točka de_bleistift n 0.0
de_streit hr_sukob n 5.63
de_unterbrechen hr_objasniti v 0.0
hr_zalistak de_herz n 0.0
hr_radnica de_kellnerin n 0.0
de_kammer hr_ćelija n 0.75
de_feind hr_prijatelj n 0.38
hr_voda de_flüssigkeit n 5.94
hr_badem de_erdnuss n 0.0
de_getränk hr_pivo n 0.0
hr_luk de_lebensmittel n 5.25
de_taschenrechner hr_računalo n 4.5
hr_gajde de_orgel n 0.13
hr_udariti de_verpassen v 0.0
de_baseball hr_nogomet n 0.0
de_umräumen hr_pomaknuti v 3.0
de_bühne hr_platforma n 3.75
de_wettbewerb hr_kalkulator n 0.13
de_kunde hr_osoba n 4.88
hr_tvor de_tier n 5.75
hr_rat de_konflikt n 5.75
hr_zbor de_gruppe n 5.75
de_fahrzeug hr_alatka n 1.38
hr_rukovodstvo de_fähigkeit n 1.75
de_vergnügen hr_stado n 0.0
de_suchen hr_pregledati v 0.25
hr_bršljan de_pflanze n 6.0
hr_motor de_zug n 0.0
hr_gaćice de_unterwäsche n 5.88
de_pfannkuchen hr_vafl n 0.38
hr_junak de_schurke n 0.13
de_meter hr_jedinica n 5.75
de_gehirn hr_pokret n 0.0
hr_olimpijada de_veranstaltung n 5.63
de_projekt hr_element n 0.0
de_periskop hr_podmornica n 0.0
hr_plivati de_sinken v 0.38
de_taube hr_ptica n 6.0
hr_djevojka de_person n 6.0
hr_osoba de_gast n 1.0
de_reptil hr_aligator n 0.0
de_gebäude hr_katedrala n 0.0
de_werkzeug hr_odvijač n 0.0
hr_ljubomora de_gefühl n 5.75
hr_Jupiter de_pluto n 0.0
de_eidechse hr_životinja n 6.0
de_amateur hr_posjed n 0.0
hr_kikiriki de_nuss n 5.75
hr_orangutan de_primat n 5.88
hr_promatrati de_bräunen v 0.0
hr_tegliti de_sagen v 0.13
hr_izgraditi de_erstellen v 4.75
hr_pas de_tier n 6.0
de_streiten hr_racionalizirati v 1.0
de_pflicht hr_služba n 1.0
hr_zmaj de_vogel n 0.5
de_bestätigen hr_prihvatiti v 3.0
hr_istraživač de_navigator n 0.38
hr_maskirati de_verbergen v 4.63
de_aufgabe hr_dužnost n 3.0
de_messgerät hr_mjera n 0.5
hr_partner de_ehe n 0.25
hr_pomaknuti de_abschleppen v 0.5
hr_zgrada de_konstruktion n 5.0
de_gefühl hr_ekstaza n 0.0
hr_ladica de_kommode n 0.0
de_schreien hr_govoriti v 4.19
hr_sjajiti de_scheinen v 4.0
hr_pjesnik de_schriftsteller n 5.63
hr_prodavati de_bestätigen v 0.25
de_joker hr_karta n 5.75
hr_šarka de_tor n 0.0
hr_uštipnuti de_berühren v 5.0
de_rosa hr_ljubičasta n 0.25
de_darm hr_jetra n 0.0
hr_vijesti de_information n 4.88
de_werfen hr_živcirati v 0.13
de_faulenzen hr_sjediti v 0.13
de_fortbewegung hr_kretanje n 5.63
de_erbse hr_hrana n 5.63
hr_cvijet de_pflanze n 6.0
hr_oblik de_dreieck n 0.0
de_charakter hr_osoba n 2.88
de_drängen hr_predložiti v 0.5
hr_šumarak de_gruppe n 1.25
hr_plodovi_mora de_fisch n 0.0
hr_geologija de_gedanke n 0.5
hr_znak de_hinweis n 3.0
de_woche hr_početak n 0.0
de_blicken hr_gledati v 5.75
hr_razgovor de_debattieren v 0.38
hr_bijeda de_trauer n 1.38
hr_sakriti de_entwickeln v 0.0
de_alt hr_tenor n 0.0
de_leistung hr_sjedalo n 0.0
de_aroma hr_rukav n 0.0
de_heugabel hr_alat n 5.63
de_erziehen hr_podučavati v 3.5
hr_gmaz de_tier n 5.88
hr_amater de_experte n 0.38
de_blume hr_biljka n 6.0
hr_razdoblje de_pubertät n 0.0
hr_koljeno de_gelenk n 5.88
de_ratte hr_životinja n 6.0
hr_oštećenje de_schaden n 4.63
hr_srce de_intellekt n 0.0
hr_prisustvo de_aussehen n 0.0
hr_roditelj de_kind n 1.13
de_wasser hr_lokva n 0.0
hr_djevojka de_junge n 0.13
de_gewinnen hr_nabaviti v 1.88
de_medizin hr_tableta n 0.0
de_anmerken hr_ubiti v 0.13
hr_helij de_gas n 5.75
de_lebensmittel hr_ječam n 0.0
hr_dijete de_ziege n 0.0
hr_aritmetika de_mathematik n 5.38
de_zeremonie hr_pogreb n 0.0
hr_odlutati de_schweben v 0.5
hr_torta de_lebensmittel n 5.25
hr_zvijezda de_galaxis n 0.13
hr_kamion de_fahrzeug n 6.0
hr_šuma de_dschungel n 0.0
de_schnurrbart hr_dlaka n 3.0
de_pflicht hr_zadatak n 2.75
de_brombeere hr_voće n 5.5
hr_mlijeko de_butter n 0.0
de_limette hr_voće n 5.88
de_körper hr_leš n 0.75
hr_dobiti de_platzen v 0.0
de_gewölbe hr_banka n 0.13
de_eiweiß hr_mlijeko n 0.38
de_auto hr_vlak n 0.0
hr_puma de_katze n 5.88
hr_bor de_baum n 6.0
hr_kupus de_gemüse n 6.0
hr_škamp de_hummer n 0.0
de_spitze hr_olovka n 0.5
hr_knjiga de_enzyklopädie n 0.0
de_kofferraum hr_automobil n 0.0
hr_dati de_nehmen v 0.0
hr_ulica de_boulevard n 0.5
hr_trešnja de_traube n 0.0
de_softball hr_sport n 6.0
de_necken hr_smetati v 3.75
hr_nevjesta de_versammlung n 0.0
de_reichtum hr_siromaštvo n 0.0
de_kreatur hr_buba n 0.0
de_ehemann hr_supružnik n 6.0
de_stoßzahn hr_slon n 0.0
hr_ići de_entlassen v 0.25
hr_zavjet de_versprechen n 5.63
de_verblassen hr_iščeznuti v 4.88
de_störung hr_red n 0.25
hr_rak de_meeresfrüchte n 5.63
hr_kofein de_tee n 0.0
de_kompetenz hr_sposobnost n 4.75
hr_krevet de_schlafzimmer n 0.13
de_keks hr_kolačić n 4.13
de_rüstung hr_tavan n 0.0
hr_uređaj de_mikrowelle n 0.0
hr_gangster de_gang n 0.13
hr_bubnuti de_schleifen v 0.0
de_herr hr_dama n 0.0
hr_pero de_flotte n 0.0
de_instrument hr_skalpel n 0.0
de_stück hr_porcija n 2.75
de_punkt hr_mač n 0.0
de_sprengen hr_puknuti v 0.75
de_chemiker hr_znanstvenik n 5.63
hr_otac de_geige n 0.0
hr_politika de_regierung n 0.0
hr_erodirati de_zerfallen v 4.88
de_kamm hr_vrh n 1.88
hr_leđa de_schulter n 0.0
hr_sudbina de_strom n 0.0
de_summe hr_iznos n 4.38
hr_glava de_pfeil n 0.0
hr_carstvo de_königreich n 1.88
hr_tornado de_taifun n 0.13
hr_pokajanje de_schuld n 0.75
hr_pero de_stachelschwein n 0.0
hr_slon de_vorlesung n 0.0
hr_strpljenje de_ungeduld n 0.0
de_hase hr_životinja n 6.0
hr_štuka de_fisch n 6.0
de_autobahn hr_cesta n 5.75
hr_tjeskoba de_gefühl n 5.88
hr_priznati de_akzeptieren v 3.0
de_porträt hr_slika n 5.75
de_konferenz hr_sastanak n 4.5
hr_piće de_gin n 0.0
de_flüssigkeit hr_tvar n 5.25
de_mandarine hr_jezgra n 0.0
hr_cvijet de_orchidee n 0.0
de_oboe hr_instrument n 6.0
de_fuß hr_mjera n 4.75
de_ohrring hr_nakit n 6.0
hr_gledati de_schielen v 0.5
hr_sarma de_lebensmittel n 5.88
hr_harfa de_instrument n 5.88
de_necken hr_nastupati v 0.5
hr_reklama de_werbung n 5.5
hr_naramenica de_bh n 0.0
de_traube hr_hrana n 5.75
hr_hokej de_sport n 6.0
de_smog hr_dostignuće n 0.0
de_zitrusgewächs hr_drvo n 5.0
hr_uspjeti de_scheitern v 0.0
de_gras hr_bundeva n 0.0
de_koffer hr_torba n 3.5
de_flügel hr_ptica n 0.0
hr_sobarica de_diener n 5.0
hr_klinčić de_pflanze n 5.75
de_wildleder hr_koža n 5.63
de_toilette hr_aligator n 0.0
de_limousine hr_vozilo n 5.88
de_verbrauchssteuer hr_porez n 4.5
de_entfernen hr_istovariti v 0.75
hr_dužnost de_dienst n 1.0
de_herd hr_kat n 0.0
de_utensil hr_alat n 4.13
hr_kemija de_messer n 0.0
hr_aligator de_tier n 6.0
hr_raspadati_se de_erodieren v 2.0
hr_bjelančevina de_ei n 0.0
hr_mandarina de_obst n 6.0
de_lampe hr_stol n 0.0
hr_lutka de_spielzeug n 6.0
de_skulptur hr_crtež n 0.0
hr_razlog de_intellekt n 0.0
de_dieb hr_hulja n 5.0
de_plätzchen hr_hrana n 5.5
de_kupfer hr_bronca n 0.75
hr_pocrvenjeti de_klären v 0.0
hr_jogurt de_lebensmittel n 5.75
hr_felga de_rad n 0.5
de_felsblock hr_kamen n 5.0
hr_prečka de_leiter n 1.38
hr_guma de_material n 5.63
de_lingerie hr_rublje n 5.88
de_pedal hr_bicikl n 0.0
de_fingernagel hr_prst n 0.0
de_gerste hr_hrana n 5.25
hr_hokej de_satz n 0.0
de_beschuldigen hr_staviti v 0.0
de_gorilla hr_majmun n 5.75
hr_vila de_zuhause n 2.88
hr_uho de_mitarbeiter n 0.0
hr_slika de_waschmaschine n 0.0
hr_kuhalo de_herd n 0.63
hr_ledenjak de_eisberg n 3.63
hr_oklop de_dachboden n 0.0
de_chemie hr_znanost n 6.0
hr_osoblje de_schule n 0.0
hr_reći de_vorschlagen v 0.5
de_hypothese hr_bazen n 0.0
hr_hobi de_aktivität n 5.75
de_bezirk hr_zemlja n 1.38
hr_brat de_brüderlichkeit n 0.13
de_gewebe hr_organ n 0.0
de_mythos hr_legenda n 4.5
de_unterhalten hr_debata v 0.38
hr_puknuti de_platzen v 0.38
hr_profesionalac de_amateur n 0.0
hr_majmun de_humor n 0.0
de_sieger hr_gubitnik n 0.0
hr_instrument de_gitarre n 0.0
de_parfüm hr_dezodorans n 0.13
de_mann hr_žensko n 0.0
de_form hr_trokut n 0.0
hr_sisavac de_hund n 0.0
hr_bujon de_suppe n 5.25
de_studentenverbindung hr_organizacija n 5.75
hr_pečenica de_fleisch n 5.88
hr_nikotin de_tabak n 0.0
de_stunde hr_život n 0.0
de_mensch hr_životinja n 4.13
de_stoßstange hr_automobil n 0.0
de_person hr_govornik n 0.25
hr_zid de_zimmer n 0.0
de_klinge hr_kosilica n 0.13
hr_zagrliti de_halten v 3.5
de_kreatur hr_vuk n 0.0
hr_purica de_vogel n 5.75
de_petersilie hr_kadulja n 0.0
hr_dečko de_freundin n 0.25
de_hören hr_vid n 0.0
hr_operirati de_steuern v 0.25
de_käse hr_maslac n 0.0
hr_kupina de_obst n 5.5
de_affe hr_sisavac n 6.0
de_vier hr_dva n 0.0
de_handtasche hr_zdjela n 0.0
de_hundert hr_broj n 6.0
de_greifen hr_uzeti v 4.13
hr_prilog de_substantiv n 0.0
hr_zadržati de_geben v 0.0
de_abendessen hr_ladica n 0.0
hr_pozadina de_vorderseite n 0.0
hr_zakonodavstvo de_legion n 0.0
hr_službenik de_person n 5.5
de_szene hr_film n 0.0
de_ehepartner hr_brak n 0.0
de_schwäche hr_snaga n 0.38
hr_poezija de_prosa n 0.13
de_lernen hr_suditi v 0.13
de_sitzen hr_leći v 0.0
hr_noga de_schenkel n 0.38
de_integrieren hr_miješati v 2.63
hr_hraniti de_verhungern v 0.0
de_bohne hr_hrana n 5.88
de_komponente hr_element n 1.88
de_rubin hr_dragulj n 5.38
de_mittagessen hr_večera n 0.13
hr_fotelja de_möbel n 5.75
de_verteidigen hr_zaštititi v 4.75
hr_komunikacija de_konversation n 0.88
de_nonne hr_softball n 0.0
de_zahn hr_pila n 0.38
hr_tragedija de_komödie n 0.5
hr_vatra de_wasser n 0.0
de_schlangengift hr_otrov n 6.0
de_halskette hr_narukvica n 0.0
de_wolf hr_stvorenje n 5.88
hr_svećenik de_rabbi n 0.5
hr_rukomet de_sport n 6.0
hr_tamnica de_schloss n 0.63
hr_rotkvica de_gemüse n 6.0
de_gemälde hr_umjetnost n 5.13
de_olive hr_krastavac n 0.0
de_meißel hr_alat n 5.75
hr_susjedstvo de_bereich n 4.25
hr_rog de_hirsch n 0.0
de_gegenwart hr_budućnost n 1.25
de_wettbewerb hr_borba n 3.38
de_pille hr_droga n 3.0
de_hühnerstange hr_pijetao n 0.5
de_krieg hr_anatomija n 0.0
hr_prisjetiti_se de_fragen v 0.0
hr_dobit de_verlust n 0.0
de_handlung hr_drama n 0.0
de_erstellen hr_izgraditi v 1.75
de_eindruck hr_avenija n 0.0
hr_vrhunac de_höhepunkt n 4.38
hr_zaboraviti de_verweigern v 0.5
de_dämmerung hr_bogatstvo n 0.0
hr_kuk de_gelenk n 4.88
hr_stolica de_bank n 0.63
de_portion hr_količina n 5.0
de_stoßen hr_samljeti v 0.0
de_waffe hr_bodež n 0.0
hr_klokan de_tier n 6.0
de_sandale hr_cipela n 5.75
de_gebäck hr_hrana n 5.38
hr_dupin de_säugetier n 6.0
hr_sova de_tier n 6.0
hr_slika de_bild n 4.38
de_tastatur hr_ruka n 0.0
de_leber hr_biolog n 0.0
hr_odvijač de_hammer n 0.0
hr_uspon de_abstieg n 0.25
hr_mnoštvo de_quantität n 4.63
hr_odgoditi de_eilen v 0.0
de_zunge hr_usta n 0.0
de_aufsteigen hr_podići v 3.63
de_überwältigen hr_poraziti v 3.5
de_rose hr_biljka n 6.0
de_prinz hr_kapetan n 0.63
hr_deva de_tier n 6.0
hr_limun de_baum n 5.0
de_seehund hr_sisavac n 5.75
hr_koža de_haar n 0.13
de_bett hr_namještaj n 6.0
de_darm hr_trbuh n 0.0
hr_hipoteza de_idee n 5.13
hr_vozilo de_motorrad n 0.0
de_gedanke hr_razmišljanje n 3.38
de_spielzeug hr_lutka n 0.0
hr_razbojnik de_dunkelheit n 0.0
hr_mungos de_tier n 5.5
hr_voda de_luft n 0.0
hr_kokice de_lebensmittel n 4.75
hr_trag de_hinweis n 4.25
de_fuß hr_inč n 0.25
de_bildbeschriftung hr_zaglavlje n 2.25
de_schmoren hr_kuhati v 5.13
hr_domaći de_aufgabe n 5.13
hr_banana de_obst n 6.0
hr_sport de_volleyball n 0.0
de_kern hr_atom n 0.38
de_substantiv hr_riječ n 6.0
de_foto hr_imidž n 4.38
hr_drvo de_wald n 0.0
hr_direktor de_vorgesetzter n 5.13
hr_zadatak de_job n 2.0
de_bier hr_tekućina n 6.0
hr_oluja de_taifun n 0.5
de_hypothese hr_ideja n 5.13
de_gerät hr_pećnica n 0.0
de_verschluss hr_fotoaparat n 0.0
de_athlet hr_sportaš n 6.0
hr_flauta de_instrument n 5.88
de_geologie hr_znanost n 6.0
de_mampfen hr_žvakati v 4.0
de_unfähigkeit hr_sposobnost n 0.0
hr_slaganje de_uneinigkeit n 0.0
hr_sudbina de_matrose n 0.0
hr_empatija de_gefühl n 5.63
de_mittagessen hr_doručak n 0.13
hr_oblik de_kugel n 0.13
hr_slon de_tier n 6.0
de_sonnenaufgang hr_zalazak n 0.0
hr_tresti de_sinken v 0.0
de_fliehen hr_trčati v 2.0
hr_limun de_zitrusgewächs n 5.88
hr_časopis de_veröffentlichung n 5.25
de_schwert hr_oružje n 5.88
de_hoffnung hr_očaj n 0.0
hr_svinjetina de_schwein n 1.13
de_bratensoße hr_sos n 5.88
hr_glina de_backstein n 0.0
de_krankheit hr_karcinom n 0.0
de_halle hr_prolaz n 0.75
de_sechs hr_broj n 6.0
de_schlange hr_slabost n 0.0
hr_branik de_auto n 0.0
hr_puška de_feuerwaffe n 5.5
de_bauen hr_uništiti v 0.0
hr_promatrati de_ansehen v 5.63
de_sandwich hr_obrok n 4.0
hr_pliskavica de_wal n 5.0
de_reis hr_hrana n 5.88
de_schicksal hr_potok n 0.0
de_schwanz hr_voda n 0.0
hr_val de_bewegung n 3.5
hr_granit de_stein n 5.75
de_religion hr_vjerovanje n 4.75
de_gen hr_kromosom n 0.38
hr_provalnik de_gauner n 5.38
de_lachen hr_plakati v 0.0
de_kind hr_roditelj n 0.25
de_silber hr_zlato n 0.0
hr_poni de_pferd n 5.63
hr_kriviti de_stellen v 0.0
hr_tikva de_lebensmittel n 5.63
de_ablehnen hr_prihvatiti v 0.0
hr_tuga de_freude n 0.0
hr_vjerovanje de_aberglaube n 1.38
hr_pik de_karte n 4.25
hr_neboder de_treffen n 0.0
de_armband hr_ogrlica n 0.5
de_stoff hr_svila n 0.0
hr_ječam de_lebensmittel n 5.25
de_pärchen hr_par n 5.63
de_insasse hr_osuđenik n 4.0
hr_morž de_säugetier n 5.75
de_gepäck hr_kovčeg n 0.0
hr_snaga de_lehm n 0.0
hr_žena de_heldin n 0.25
hr_hrana de_kuchen n 0.0
de_gerät hr_perilica n 0.0
hr_repa de_pflanze n 5.63
de_kapazität hr_ograničenje n 3.38
de_schritt hr_stubište n 0.0
de_bedeutung hr_sloboda n 0.0
de_steuerbord hr_krma n 0.0
de_sänger hr_dokaz n 0.0
de_erdbeere hr_hrana n 5.25
hr_baciti de_pausieren v 0.0
de_material hr_guma n 0.0
hr_kestenjasta de_farbe n 5.5
hr_moliti_se de_kommunizieren v 3.5
hr_lopov de_gauner n 5.0
hr_prizma de_form n 5.75
de_stufe hr_stubište n 0.5
de_busen hr_grudi n 4.75
hr_radnik de_mechaniker n 0.0
de_betrug hr_obmana n 5.5
de_teller hr_žlica n 0.0
hr_usluga de_fehler n 0.0
hr_sestra de_studentenverbindung n 0.0
de_grün hr_plava n 0.25
de_pronomen hr_riječ n 6.0
de_gasse hr_cesta n 5.13
hr_namještaj de_bett n 0.0
de_hüfte hr_zglob n 4.88
hr_enciklopedija de_buch n 5.75
hr_polica de_zähler n 0.0
de_feuerwaffe hr_oružje n 6.0
de_bitten hr_gucnuti v 0.0
de_klinge hr_nož n 1.13
hr_video de_fernsehen n 0.13
hr_krilo de_haut n 0.0
de_limousine hr_glavobolja n 0.0
hr_aleja de_weg n 5.38
de_bürgersteig hr_nogostup n 5.75
hr_gljiva de_lebensmittel n 5.25
hr_šupljina de_ratte n 0.0
hr_pivo de_alkohol n 5.88
hr_nada de_verzweiflung n 0.0
de_vogel hr_gusak n 0.0
hr_večera de_dinosaurier n 0.0
hr_mikroskop de_fernrohr n 0.0
de_professor hr_profesionalac n 5.0
de_gewebe hr_obrok n 0.0
hr_noga de_stuhl n 0.0
de_bier hr_alkohol n 5.88
de_null hr_broj n 5.75
de_hemd hr_mikroskop n 0.0
hr_vježba de_aktivität n 5.38
hr_prilog de_wort n 6.0
hr_zalazak de_abend n 1.13
de_matratze hr_krevet n 1.5
de_fachmann hr_amater n 0.0
de_epoche hr_vrijeme n 4.63
hr_građanin de_verkäufer n 0.13
hr_špinat de_gemüse n 5.75
hr_žeti de_gewinnen v 1.5
hr_otvor de_eingang n 2.25
de_uneinigkeit hr_sukob n 5.0
hr_slomiti de_erklären v 0.0
de_zeigen hr_reći v 0.75
de_breite hr_visina n 0.0
hr_rukavica_s_palcem de_handschuh n 6.0
hr_krilo de_vogel n 0.0
de_stille hr_zvuk n 1.75
hr_fond de_organisation n 5.0
de_prinzessin hr_bogatstvo n 0.0
de_möwe hr_ptica n 6.0
hr_sirena de_signal n 5.38
hr_pročelje de_rückseite n 0.0
hr_bendžo de_gitarre n 2.75
de_techniker hr_radnik n 5.75
de_wasser hr_tekućina n 5.94
hr_smokva de_lebensmittel n 5.63
hr_ocat de_säure n 4.88
hr_srebro de_gold n 0.0
hr_dvanaest de_nummer n 5.75
hr_postaviti de_schwingen v 0.0
de_dschungel hr_šuma n 5.5
de_albtraum hr_san n 5.88
de_krabbe hr_plodovi_mora n 5.63
hr_milja de_zoll n 0.0
de_ernsthaftigkeit hr_iskrenost n 2.13
de_grün hr_žuta n 0.25
de_gerät hr_hladnjak n 0.0
hr_svjetlost de_aura n 0.88
hr_grah de_lebensmittel n 5.88
hr_pridjev de_wort n 6.0
hr_otok de_land n 3.13
de_gefühl hr_empatija n 0.13
hr_vile de_mischung n 0.0
de_kopfschmerzen hr_bol n 6.0
de_bildbeschriftung hr_tehnika n 0.0
hr_zgrabiti de_nehmen v 4.13
de_stoßzahn hr_dužnost n 0.0
de_deck hr_brod n 0.0
de_fass hr_pištolj n 0.0
de_muschel hr_hrana n 5.38
hr_obrisati de_fangen v 0.0
hr_zelena de_gelb n 0.25
de_substantiv hr_glagol n 0.0
de_abweichen hr_složiti_se v 0.0
de_tier hr_spremnik n 0.0
hr_promišljati de_denken v 5.63
de_kürbis hr_hrana n 5.63
hr_pomaknuti de_entladen v 0.13
de_leihen hr_gnjaviti v 0.0
hr_školjka de_lebensmittel n 5.13
hr_čipka de_schuh n 0.0
de_graph hr_dijagram n 5.0
hr_rakun de_tier n 6.0
de_mutterschaf hr_ovca n 4.75
de_schleppen hr_nositi v 5.25
hr_kruh de_fußball n 0.0
hr_braniti de_schmieren v 0.0
hr_most de_kreuz n 0.0
hr_zob de_lebensmittel n 5.5
hr_pisac de_dichter n 0.38
de_punkt hr_olovka n 0.0
de_schlange hr_životinja n 5.88
hr_dojam de_allee n 0.0
de_verbergen hr_razviti v 0.0
de_empfangshalle hr_svila n 0.0
de_autorität hr_moć n 5.0
hr_štakor de_tier n 6.0
hr_dati de_senden v 1.13
de_kette hr_bicikl n 0.0
de_emotion hr_osjećaj n 4.88
hr_pomaknuti de_verändern v 3.63
de_zerfallen hr_spaliti v 0.25
de_pfeife hr_orgulje n 0.13
hr_dabar de_tier n 5.88
de_versammlung hr_gozba n 0.38
de_stethoskop hr_instrument n 5.75
de_jet hr_avion n 5.88
hr_smokva de_datum n 0.0
hr_vino de_traube n 0.13
de_mikrowelle hr_uređaj n 5.88
hr_imenica de_wort n 6.0
de_ritual hr_običaj n 4.88
de_hinzufügen hr_oduzeti v 0.13
hr_jezero de_wasser n 4.88
hr_stijena de_stein n 5.0
de_glas hr_šalica n 0.5
hr_palac de_fuß n 0.13
de_kofferraum hr_slon n 0.0
de_moskito hr_mudrost n 0.0
hr_reminiscencija de_erinnerung n 5.0
hr_kamin de_kamin n 0.38
hr_štap de_stengel n 0.0
hr_potok de_sauerstoff n 0.0
de_hähnchen hr_hrana n 5.25
hr_jorgan de_decke n 6.0
de_stirn hr_lice n 0.0
de_zucht hr_bik n 0.38
de_gelingen hr_podbaciti v 0.0
hr_maskara de_lippenstift n 0.0
hr_tvar de_wasser n 0.0
hr_kuhati de_einfrieren v 0.0
hr_pjesnik de_person n 5.88
hr_džip de_fahrzeug n 5.88
hr_večera de_schublade n 0.0
hr_skalpel de_kanarienvogel n 0.0
de_tablette hr_lijek n 5.0
hr_glavobolja de_schmerzen n 6.0
hr_plamen de_vergnügen n 0.13
hr_tenor de_sänger n 5.25
de_fußball hr_košarka n 0.0
hr_prodavač de_person n 5.88
hr_sin de_tochter n 0.0
hr_tamnica de_knast n 4.5
hr_atlas de_buch n 5.13
de_humpeln hr_hodati v 5.0
de_kürbis hr_povrće n 5.75
hr_gost de_person n 4.63
hr_insekt de_moskito n 0.0
hr_paluba de_schiff n 0.0
hr_sjedenje de_stellung n 0.0
de_bürger hr_prodavač n 0.13
de_mittagessen hr_violina n 0.0
hr_bobica de_kirsche n 0.0
de_mitarbeiter hr_škola n 0.0
hr_procijeniti de_reflektieren v 1.5
de_entfernen hr_pomaknuti v 3.5
hr_zapovjednik de_führer n 5.25
hr_puž de_tier n 6.0
hr_mlijeko de_flüssigkeit n 5.88
de_beschuldigen hr_piti v 0.0
de_hamburger hr_ptica n 0.0
de_biber hr_životinja n 5.88
de_nerven hr_zafrkavati v 3.0
de_waffe hr_mač n 0.0
hr_bogatstvo de_reichtum n 5.0
hr_kršćanin de_kirche n 0.5
de_tuba hr_instrument n 5.75
de_adverb hr_riječ n 6.0
de_hobby hr_interes n 5.0
hr_zaposlenik de_arbeitnehmer n 5.0
de_mauer hr_odjel n 0.0
de_otter hr_životinja n 6.0
de_beruhigen hr_tješiti v 2.38
hr_dijete de_elternteil n 0.25
hr_vid de_vision n 0.75
de_eiweiß hr_jaje n 0.0
de_pflaume hr_voće n 6.0
hr_borovnica de_beere n 6.0
hr_baciti de_show v 0.0
hr_užina de_mahlzeit n 5.75
de_abschlussball hr_zabava n 5.63
de_vergessen hr_poreći v 0.5
hr_voda de_eis n 0.75
hr_peta de_schenkel n 0.0
de_gin hr_piće n 5.88
de_hündchen hr_životinja n 5.75
de_hexe hr_posao n 0.13
hr_trava de_mark n 0.0
de_vertrag hr_dokument n 5.75
hr_gmaz de_alligator n 0.0
hr_osjećaj de_eifersucht n 0.0
hr_misao de_glaube n 0.88
hr_direktor de_dirigent n 1.25
de_erdbeere hr_borovnica n 0.0
de_manschette hr_rukav n 0.0
de_legislative hr_legija n 0.0
de_mechaniker hr_radnik n 5.63
de_rubin hr_smaragd n 0.0
de_keks hr_hrana n 5.63
hr_orhideja de_blume n 6.0
de_sardine hr_hrana n 5.38
de_kalb hr_životinja n 6.0
hr_pokret de_bewegung n 5.63
de_lunge hr_organ n 6.0
de_tastatur hr_orgulje n 0.0
hr_rog de_stier n 0.0
de_möbel hr_stolica n 0.0
de_baum hr_šuma n 0.38
hr_tuba de_instrument n 5.75
hr_jezgra de_zelle n 0.5
hr_bendžo de_instrument n 6.0
de_eule hr_ptica n 5.88
hr_životinja de_reptil n 0.13
hr_hamburger de_vogel n 0.0
de_magd hr_posluga n 5.0
hr_prsa de_brust n 4.75
hr_oznaka de_schild n 4.56
de_produkt hr_luka n 0.0
hr_pretpostaviti de_vermuten v 4.5
hr_led de_gletscher n 0.13
de_tier hr_poruka n 0.0
de_freude hr_tuga n 0.0
de_stuhl hr_namještaj n 5.88
hr_jagoda de_lebensmittel n 5.25
de_granit hr_kamen n 5.75
de_eule hr_životinja n 6.0
de_traube hr_ekstremitet n 0.0
hr_izlazak de_sonnenuntergang n 0.0
de_zimmermann hr_radnik n 5.63
hr_razgovarati de_kommunizieren v 5.63
hr_sumrak de_reichtum n 0.0
hr_brijest de_eiche n 0.0
de_messer hr_mač n 1.0
hr_šampion de_gewinner n 5.25
hr_dom de_palast n 0.13
hr_gomila de_heuhaufen n 0.0
de_auto hr_limuzina n 0.0
hr_broj de_acht n 0.0
de_anatomie hr_čovjek n 0.0
de_hain hr_grupa n 1.25
de_bestrafung hr_nagrada n 0.25
hr_cilj de_meißel n 0.0
de_pfanne hr_posuda n 4.5
de_nehmen hr_oteti v 0.88
de_behindern hr_zadržati v 1.25
hr_šah de_spiel n 5.88
de_platzen hr_buknuti v 1.63
de_anfang hr_kraj n 0.13
hr_porezotina de_verletzung n 5.63
hr_hladnjak de_ball n 0.0
hr_osjećaj de_empathie n 0.13
hr_bakalar de_fisch n 6.0
de_geologie hr_misao n 0.5
de_kricket hr_sport n 6.0
de_insel hr_zemlja n 3.13
hr_neuspjeh de_erfolg n 0.0
de_einstellen hr_ljuljati v 0.0
hr_materijal de_nylon n 0.0
de_zeh hr_stopalo n 0.13
de_allee hr_ulica n 5.38
de_straße hr_škamp n 0.0
hr_gljiva de_monster n 0.0
hr_zora de_sonnenuntergang n 1.25
de_auslöser hr_pištolj n 0.0
de_person hr_blagajnik n 0.0
hr_društvo de_gruppe n 4.25
hr_igračka de_puppe n 0.0
de_elefant hr_časnik n 0.0
hr_dohvatiti de_bauen v 0.0
de_kochen hr_dinstati v 0.0
hr_šunka de_lebensmittel n 5.63
hr_dvoje de_paar n 5.63
de_norden hr_jug n 0.0
hr_umak de_lebensmittel n 3.88
hr_čovjek de_tier n 4.13
de_form hr_prizma n 0.0
de_kader hr_skupina n 5.25
de_trampen hr_putovati v 4.63
de_affe hr_humor n 0.0
de_zerschmettern hr_slomiti v 3.63
hr_zaudarati de_entlassen v 0.0
de_säugetier hr_slon n 0.0
de_gallone hr_pinta n 0.0
hr_automobil de_zug n 0.0
de_verlangen hr_odvojiti v 0.0
de_erbse hr_povrće n 6.0
hr_pogledati de_strecken v 0.0
hr_zgrada de_wolkenkratzer n 0.0
de_violine hr_violina n 5.63
de_handwerk hr_pletenje n 0.0
de_armut hr_disciplina n 0.0
hr_dvorana de_passage n 0.75
de_pfeil hr_rana n 0.0
hr_periskop de_u-boot n 0.0
de_kritisieren hr_napomenuti v 2.63
de_muschel hr_mornar n 0.0
hr_stršljen de_wespe n 0.13
hr_obrazovanje de_schule n 0.5
hr_žena de_ehemann n 0.0
hr_krilo de_fledermaus n 0.0
hr_uređaj de_rücken n 0.0
de_waschmittel hr_čistač n 4.88
de_kichern hr_smijati_se v 5.5
de_knöchel hr_zglob n 5.38
de_messer hr_bodež n 0.63
de_mädchen hr_dijete n 5.38
de_steigen hr_sići v 0.0
de_zeitung hr_medij n 5.88
de_sport hr_aktivnost n 5.88
hr_ljuska de_schale n 0.5
de_smog hr_zagađenje n 5.0
de_erreichen hr_povećati v 0.13
hr_naslov de_überschrift n 2.25
hr_slon de_offizier n 0.0
hr_postolar de_kuchen n 0.0
hr_mir de_krieg n 0.0
de_katze hr_izgled n 0.13
de_kern hr_stanica n 0.5
hr_ceremonija de_klinge n 0.0
hr_materijal de_leder n 0.0
hr_misliti de_vermuten v 0.5
hr_geologija de_wissenschaft n 6.0
hr_uho de_kopf n 0.38
de_architektur hr_voda n 0.0
de_freisetzen hr_zadržati v 0.0
de_meeresfrüchte hr_dagnja n 0.0
hr_komora de_märchen n 0.0
hr_noga de_arm n 0.25
hr_miš de_ratte n 0.0
hr_princeza de_prinz n 0.0
de_wischen hr_trljati v 2.88
de_sitzung hr_stajanje n 0.0
de_ehefrau hr_žena n 6.0
de_kohl hr_hrana n 5.5
de_schnürsenkel hr_cipela n 0.0
hr_spremnik de_flasche n 0.0
de_fußball hr_lopta n 6.0
hr_osoba de_redner n 0.25
de_schmuck hr_prsten n 0.0
de_garnele hr_jastog n 0.0
hr_staklenka de_flasche n 2.88
de_steckrübe hr_biljka n 5.63
hr_šepati de_gehen v 5.0
hr_kositar de_aluminium n 0.0
hr_svađa de_konflikt n 5.63
hr_oklijevati de_warten v 4.5
de_zustimmung hr_neslaganje n 0.0
hr_sok de_flüssigkeit n 6.0
hr_djevojčica de_kind n 5.38
hr_tipkovnica de_computer n 0.0
hr_vrlina de_landschaft n 0.0
de_ventil hr_srce n 0.0
hr_novine de_medium n 5.88
de_schildkröte hr_životinja n 6.0
hr_trešnja de_obst n 6.0
de_mönch hr_protivnik n 0.0
hr_ustati de_fallen v 0.0
de_zinn hr_aluminij n 0.0
hr_dopustiti de_zurückkehren v 0.0
hr_gutati de_verkaufen v 0.0
hr_brak de_ritual n 2.88
hr_političar de_senator n 0.13
hr_sjever de_richtung n 5.75
de_leiche hr_tijelo n 5.25
hr_uzica de_schnur n 4.25
de_rum hr_alkohol n 6.0
hr_jaje de_milch n 0.0
hr_riba de_hai n 0.0
hr_gležanj de_gelenk n 5.38
de_weste hr_košulja n 0.0
de_abendessen hr_obrok n 5.88
hr_šest de_sieben n 0.0
de_trommel hr_instrument n 6.0
de_sicht hr_vizija n 0.75
de_schinken hr_hrana n 5.63
de_maus hr_glodavac n 6.0
hr_jezik de_kehle n 0.0
de_maus hr_štakor n 0.0
de_eiche hr_bor n 0.0
de_ablehnen hr_zamazati v 0.0
hr_pivo de_getränk n 6.0
de_schweinefleisch hr_svinja n 1.13
hr_grliti de_halten v 3.0
de_orchidee hr_cvijet n 6.0
hr_smrt de_geburt n 0.0
hr_tkivo de_haut n 0.0
de_schöpfer hr_umjetnik n 2.38
de_schluchzen hr_plakati v 4.0
hr_teletina de_fleisch n 6.0
hr_neslaganje de_konflikt n 5.0
hr_pjevušiti de_pfeifen v 0.25
de_schnecke hr_hrabrost n 0.0
hr_kafić de_kneipe n 4.13
de_kabeljau hr_riba n 6.0
hr_kritizirati de_anmerken v 2.63
de_schweinswal hr_kit n 5.0
hr_bliještati de_reflektieren v 2.13
de_halten hr_početi v 0.13
de_bein hr_ruka n 0.25
de_kirsche hr_voće n 6.0
hr_čelo de_gesicht n 0.0
hr_paket de_briefumschlag n 0.13
hr_tornado de_sturm n 5.38
de_angst hr_osjećaj n 5.88
hr_jaje de_architektur n 0.0
hr_konobarica de_bedienung n 5.75
hr_okolnost de_situation n 3.63
de_diamant hr_dragulj n 5.25
de_taifun hr_oluja n 5.5
de_flüssigkeit hr_voda n 0.0
de_krapfen hr_hrana n 5.63
de_muschel hr_dagnja n 0.25
hr_sići de_erstellen v 0.0
de_schmuck hr_naušnica n 0.0
hr_pero de_vogel n 0.0
de_hurrikan hr_oluja n 5.38
hr_obrva de_gesicht n 0.0
de_erreichen hr_izgraditi v 0.0
de_gewehr hr_pištolj n 0.25
hr_staviti de_geben v 0.38
hr_vozač de_geweih n 0.0
hr_dječak de_kind n 5.56
hr_tlo de_grund n 2.75
hr_dotaknuti de_kneifen v 0.25
hr_pretvarati_se de_tunken v 0.0
hr_govor de_sprache n 2.38
de_regen hr_pljusak n 0.5
hr_baseball de_fußball n 0.0
de_erdnuss hr_orašasti_plod n 5.75
de_kaschunuss hr_orašasti_plod n 6.0
hr_student de_schüler n 3.38
hr_želja de_attackieren v 0.0
hr_grgeč de_schlafplatz n 0.5
hr_bodež de_waffe n 5.63
hr_manjina de_toilette n 0.0
de_empathie hr_osjećaj n 5.63
hr_duhovitost de_humor n 5.0
hr_komora de_zelle n 0.75
hr_biljka de_steckrübe n 0.0
de_pinguin hr_životinja n 6.0
de_bauch hr_trbuh n 0.5
hr_pokret de_aktivität n 5.38
de_geben hr_uzeti v 0.0
de_rückseite hr_pročelje n 0.0
hr_promijeniti de_überzeugen v 0.25
hr_šalica de_container n 3.5
de_stumpf hr_stablo n 1.75
hr_emocija de_gefühl n 4.88
de_blumenkohl hr_brokula n 0.25
de_verbieten hr_spriječiti v 5.0
de_obst hr_trešnja n 0.0
de_zerstören hr_ubiti v 0.38
hr_metal de_gesellschaft n 0.13
de_atom hr_mitologija n 0.0
hr_posljedica de_reaktion n 1.0
de_fuchs hr_životinja n 6.0
hr_nevjesta de_hochzeit n 0.0
hr_jezik de_mund n 0.0
de_volleyball hr_aktivnost n 5.63
de_person hr_gost n 1.0
de_vanillesoße hr_zgrada n 0.0
de_kommandant hr_vođa n 5.25
de_medikation hr_saksofon n 0.0
hr_jasle de_behandlung n 0.0
de_hacke hr_bedro n 0.0
de_schlagen hr_uništiti v 2.5
hr_novčanik de_aktentasche n 0.88
hr_kriviti de_trinken v 0.0
hr_rotkvica de_karotte n 0.38
de_mantel hr_kaput n 3.0
hr_zalazak de_sonnenaufgang n 0.0
de_bolzen hr_brava n 0.0
de_waschmaschine hr_uređaj n 5.75
de_kuchen hr_hrana n 5.38
de_eishockey hr_rečenica n 0.0
hr_kobasica de_lebensmittel n 5.5
hr_kofein de_problem n 0.38
hr_miš de_nagetier n 6.0
de_form hr_sfera n 0.13
de_herz hr_intelekt n 0.0
hr_metar de_maß n 5.25
de_kopfsalat hr_hrana n 5.63
hr_tlo de_erde n 2.75
hr_pokazati de_vereinen v 0.0
hr_televizija de_medium n 5.5
hr_ceremonija de_abschluss n 0.38
de_zoll hr_mjera n 5.75
de_politiker hr_guverner n 0.0
de_mensch hr_enciklopedija n 0.25
de_horn hr_instrument n 6.0
de_bagel hr_hrana n 5.75
de_ballerina hr_plesač n 5.88
de_algebra hr_matematika n 6.0
de_barriere hr_zid n 0.88
de_antwort hr_pitanje n 0.25
hr_kit de_kricket n 0.0
de_buchstabe hr_simbol n 5.75
de_mauer hr_prepreka n 4.38
de_wohnwagen hr_vozilo n 5.63
hr_korak de_treppe n 0.0
de_mann hr_žena n 0.0
hr_čeljust de_gesicht n 0.13
de_silber hr_metal n 5.5
de_hobby hr_aktivnost n 5.75
de_grabstein hr_grob n 0.63
hr_alatka de_werkzeug n 4.13
hr_dlaka de_säugetier n 0.25
hr_sjediti de_stehen v 0.13
de_krieg hr_sukob n 5.75
de_knie hr_zglob n 5.88
de_zeitschrift hr_publikacija n 5.25
hr_skupina de_gang n 0.13
hr_profesionalac de_professor n 0.5
de_quadrat hr_krug n 0.0
hr_zid de_barriere n 4.38
de_mädchen hr_dečko n 0.13
de_kopf hr_rep n 0.0
hr_noga de_extremität n 5.75
hr_kišobran de_eis n 0.0
hr_vladar de_kaiser n 0.0
hr_ukloniti de_entladen v 0.75
hr_papir de_material n 5.75
de_bulette hr_hrana n 5.88
hr_zahod de_kommunikation n 0.0
hr_stolar de_arbeitnehmer n 5.63
hr_mesar de_bäcker n 0.0
de_medikation hr_tretman n 5.5
de_denken hr_sumnjati v 0.5
de_zehncentstück hr_kuna n 0.5
hr_semestar de_stunde n 0.0
de_erfassen hr_krckati v 0.38
hr_okrug de_land n 1.38
hr_miješati de_integrieren v 2.5
de_bein hr_ekstremitet n 5.75
de_semester hr_sat n 0.0
de_trauer hr_otac n 0.0
hr_jug de_richtung n 6.0
hr_zrakoplov de_kanone n 0.0
de_waffe hr_pištolj n 0.13
de_gewebe hr_most n 0.0
hr_muško de_frau n 0.0
de_laus hr_buba n 6.0
de_gerät hr_mikrovalna n 0.0
de_primat hr_životinja n 4.88
hr_tulum de_veranstaltung n 5.75
de_gruppe hr_osoblje n 0.0
hr_napasti de_beseitigen v 0.38
hr_sfera de_globus n 0.0
hr_radnik de_maurer n 0.0
hr_priznati de_ignorieren v 0.0
hr_koljač de_killer n 5.38
hr_tenis de_aktivität n 5.63
hr_krema de_lebensmittel n 4.25
hr_prasnuti de_ausbrechen v 1.63
hr_hrana de_wurst n 0.0
de_alkohol hr_džin n 0.0
hr_miješati de_verbinden v 2.38
hr_čelik de_klinge n 0.0
de_holz hr_šuma n 0.0
hr_dizajnirati de_zeichnen v 1.63
hr_cijev de_gewehr n 0.0
de_bedienung hr_pogreška n 0.0
de_pferd hr_tim n 0.0
hr_dužnost de_aufgabe n 2.75
de_ehefrau hr_muž n 0.0
hr_ručak de_abendessen n 0.13
hr_zagađenje de_boot n 0.0
de_brot hr_hrana n 6.0
hr_riba de_ventil n 0.0
hr_dobiti de_bekommen v 1.88
hr_vjera de_religion n 0.88
hr_sport de_axt n 0.0
de_bild hr_televizija n 0.13
hr_točka de_nadel n 0.0
de_verschlechtern hr_zaboraviti v 0.13
hr_autor de_schöpfer n 4.75
hr_hrana de_gerste n 0.0
de_kartoffel hr_rajčica n 0.0
hr_tišina de_geräusch n 1.75
de_steak hr_hrana n 5.5
hr_mama de_elternteil n 5.88
de_kette hr_kanta n 0.0
de_ofen hr_uređaj n 5.88
de_seide hr_pamuk n 0.0
de_hornisse hr_osa n 0.13
de_trance hr_stanje n 5.63
hr_ruža de_pflanze n 6.0
hr_radnik de_zimmermann n 0.13
de_stinken hr_odbaciti v 0.0
de_eifersucht hr_osjećaj n 5.75
de_retten hr_slomiti v 0.0
hr_zipka de_wiege n 5.75
de_bräutigam hr_vjenčanje n 0.0
hr_sreća de_emotion n 5.63
de_witz hr_humor n 5.0
hr_vojska de_demokratie n 0.0
hr_čovjek de_säugetier n 5.25
hr_pogoršati de_vergessen v 0.13
hr_bilten de_nachrichten n 3.63
de_wiederherstellen hr_pauzirati v 0.0
hr_ručak de_geige n 0.0
hr_tableta de_medizin n 5.0
hr_rog de_ziege n 0.0
de_schublade hr_komoda n 0.0
de_besiegen hr_odreći_se v 0.0
hr_obrazovanje de_reich n 0.0
de_zitrone hr_agrum n 5.88
hr_svila de_stoff n 5.75
hr_usta de_universum n 0.0
hr_raspravljati de_rationalisieren v 1.0
de_wiege hr_jasle n 0.88
de_gletscher hr_santa n 3.63
de_affe hr_primat n 5.88
de_aufteilung hr_skupina n 0.0
hr_celer de_lebensmittel n 5.75
de_königin hr_tuš n 0.0
de_finger hr_palac n 0.0
de_säge hr_alat n 6.0
de_regenschirm hr_led n 0.0
hr_sjediti de_faulenzen v 1.0
de_machen hr_izgraditi v 0.75
hr_rubin de_kristall n 5.63
de_blicken hr_buljiti v 1.25
hr_kriket de_sport n 6.0
de_knall hr_buka n 5.75
hr_astronomija de_wissenschaft n 6.0
hr_slika de_kunst n 5.13
hr_natjecanje de_wettkampf n 3.38
de_kennzeichen hr_znak n 5.13
de_kassierer hr_osoba n 5.63
de_pflanze hr_životinja n 0.0
de_zeit hr_prostor n 0.25
hr_glina de_keramik n 0.0
hr_vještica de_job n 0.13
de_schraubendreher hr_alat n 6.0
hr_tjestenina de_lebensmittel n 5.38
hr_vuk de_kreatur n 5.88
de_kamerad hr_partner n 4.5
de_jazz hr_glazba n 5.88
de_maus hr_životinja n 6.0
de_leutnant hr_časnik n 3.88
de_baum hr_biljka n 5.63
hr_javor de_baum n 6.0
hr_suprug de_ehepartner n 6.0
de_flügel hr_šišmiš n 0.0
de_boulevard hr_ulica n 5.63
hr_uništiti de_töten v 0.38
de_gouverneur hr_političar n 5.5
hr_ljubav de_gefühl n 5.88
de_brücke hr_križ n 0.0
hr_znanost de_anatomie n 0.0
de_erweiterung hr_dodatak n 4.0
de_opossum hr_životinja n 6.0
de_hacke hr_cipela n 0.38
de_gebäude hr_neboder n 0.0
de_dreieck hr_oblik n 5.75
hr_napraviti de_bauen v 0.75
de_idol hr_mač n 0.0
hr_osam de_nummer n 6.0
hr_profesor de_mitarbeiter n 4.88
hr_svjetlo de_signal n 4.88
hr_štednjak de_fußboden n 0.0
de_hausaufgaben hr_zadatak n 5.13
de_säugetier hr_životinja n 5.88
hr_kćer de_frau n 5.25
hr_jagoda de_blaubeere n 0.0
hr_profesor de_fakultät n 0.0
de_affe hr_životinja n 6.0
de_hacke hr_čizma n 0.0
de_monat hr_godina n 0.25
de_tier hr_janje n 0.0
hr_savjetovati de_reden v 3.5
de_pyramide hr_oblik n 5.25
de_flügel hr_zrakoplov n 0.0
de_reflektieren hr_razmišljati v 5.63
de_arbeitslosigkeit hr_zaposlenost n 0.13
hr_zadovoljstvo de_herde n 0.0
hr_proizvođač de_hersteller n 5.38
hr_naranča de_obst n 6.0
de_geige hr_instrument n 6.0
de_tür hr_ulaz n 5.0
de_hund hr_sisavac n 6.0
hr_prepreka de_mauer n 0.88
de_zögern hr_čekati v 4.5
hr_primat de_tier n 4.88
de_region hr_partner n 0.0
de_telefon hr_uređaj n 5.88
hr_odjel de_organisation n 2.75
hr_cvjetača de_lebensmittel n 5.88
de_himmel hr_pakao n 0.0
hr_krtica de_tier n 6.0
de_flugzeug hr_top n 0.0
hr_leopard de_tiger n 0.13
de_dom hr_ozljeda n 0.0
de_halsband hr_vrat n 0.0
de_auge hr_lice n 0.0
hr_lanac de_fahrrad n 0.0
hr_lanac de_eimer n 0.0
de_beleidigen hr_povrijediti v 4.13
hr_pamuk de_material n 5.75
de_juwel hr_prsten n 0.0
hr_uređaj de_kühlschrank n 0.0
hr_tvorac de_künstler n 2.38
de_fahrzeug hr_motocikl n 0.0
de_koffein hr_problem n 0.38
de_arbeiten hr_kontrolirati v 0.25
de_koffein hr_čaj n 0.0
de_autor hr_tvorac n 4.75
hr_nećak de_nichte n 0.0
hr_lakat de_arm n 0.13
hr_otac de_sohn n 0.75
de_koffer hr_prtljaga n 5.38
de_saxophon hr_tretman n 0.0
de_ehepartner hr_prijatelj n 3.38
de_überwältigen hr_uzrujati v 0.63
de_kreuzung hr_cesta n 2.0
hr_motocikl de_fahrzeug n 6.0
hr_zabraniti de_untersagen v 5.0
hr_uzeti de_entführen v 0.88
hr_ogrlica de_armband n 0.0
hr_mrdnuti de_wenden v 0.75
de_neun hr_broj n 6.0
hr_sat de_leben n 0.0
de_bildung hr_škola n 0.5
de_kneifen hr_dodirnuti v 5.0
hr_razgovarati de_beraten v 0.25
hr_putovati de_trampen v 0.0
de_formel hr_pekar n 0.0
hr_lopata de_eimer n 0.0
hr_imenica de_adjektiv n 0.0
de_versprechen hr_uspon v 0.0
de_zweig hr_grana n 5.25
hr_krigla de_container n 4.13
hr_stupac de_papier n 0.0
hr_debata de_reden v 5.13
hr_klub de_gruppe n 4.75
hr_razlikovati_se de_zustimmen v 0.0
hr_tipkovnica de_organ n 0.0
hr_čimpanza de_gorilla n 0.13
hr_baka de_großelternteil n 5.75
de_film hr_sunce n 0.0
de_stahl hr_oštrica n 0.0
hr_antilop de_material n 6.0
de_wespe hr_pčela n 0.13
hr_torbica de_bedienung n 0.0
de_schreiben hr_pjesma n 0.13
hr_peršin de_salbei n 0.0
hr_tješiti de_beruhigen v 2.88
de_umdrehen hr_braniti v 0.13
de_vermögen hr_obilje n 5.0
de_mark hr_kost n 0.13
de_biologie hr_znanost n 6.0
de_dichter hr_pisac n 5.63
de_zement hr_kamen n 1.25
hr_crvendać de_vogel n 6.0
hr_koncert de_veranstaltung n 5.75
hr_šlag de_lebensmittel n 4.88
hr_vozilo de_auto n 0.0
de_fäustling hr_rukavica n 6.0
hr_katedrala de_gebäude n 6.0
hr_refren de_lied n 0.13
hr_skalpel de_werkzeug n 5.88
de_diener hr_rob n 1.38
hr_kljova de_elefant n 0.0
hr_skulptura de_zeichnung n 0.0
hr_staklo de_kabinett n 0.0
hr_katedrala de_verletzung n 0.0
de_beten hr_komunicirati v 3.5
de_dunkelheit hr_svjetlo n 0.38
hr_rak de_tier n 6.0
de_verschieben hr_promijeniti v 3.63
de_wolf hr_životinja n 6.0
hr_pokret de_aktion n 4.88
hr_oko de_gesicht n 0.0
hr_idol de_person n 3.88
de_leutnant hr_hrabrost n 0.0
de_buße hr_krivnja n 0.75
hr_osporiti de_ablehnen v 3.88
hr_čaša de_tasse n 0.5
hr_supružnik de_kamerad n 3.38
hr_lijes de_box n 5.38
de_mehl hr_tijesto n 0.0
hr_radnik de_farmer n 0.0
de_container hr_boca n 0.0
de_maschine hr_računalo n 0.0
de_sau hr_prase n 4.63
hr_dijamant de_perle n 0.38
hr_vođa de_könig n 0.13
hr_struktura de_architektur n 0.25
hr_odsutnost de_anwesenheit n 0.13
de_gefrierschrank hr_hladnjak n 3.5
hr_lipa de_münze n 5.38
hr_mjesto de_bereich n 3.75
hr_tlo de_dusche n 0.0
de_machen hr_biti v 0.88
de_nomade hr_osoba n 5.38
de_vorfahr hr_otac n 0.13
de_papst hr_vođa n 5.38
de_adverb hr_imenica n 0.0
de_crew hr_skupina n 4.88
hr_bjelančevina de_fleisch n 0.0
de_mathematik hr_znanost n 5.88
hr_smog de_verschmutzung n 5.0
de_horn hr_koza n 0.0
hr_radnik de_techniker n 0.0
hr_zbroj de_gesamtmenge n 4.38
hr_pitati de_erinnern v 0.38
hr_zatvorenik de_sträfling n 4.0
de_veröffentlichung hr_časopis n 0.63
hr_gen de_chromosom n 0.38
de_konflikt hr_rat n 0.75
hr_odreći_se de_besiegen v 0.25
de_tragödie hr_komedija n 0.5
de_blockade hr_prepreka n 4.63
de_tennis hr_aktivnost n 5.63
hr_odvijač de_werkzeug n 6.0
hr_aritmetika de_trigonometrie n 0.13
de_krug hr_boca n 2.88
de_maschine hr_začin n 0.0
de_welle hr_pokret n 3.5
de_fluss hr_gospodar n 0.0
hr_trokut de_form n 5.75
de_delphin hr_sisavac n 6.0
de_lebensmittel hr_pita n 0.0
hr_piletina de_lebensmittel n 5.25
de_oma hr_predak n 5.75
hr_panj de_baum n 1.75
de_neffe hr_nećakinja n 0.0
de_gorilla hr_primat n 5.63
de_efeu hr_biljka n 6.0
de_legislative hr_vlada n 2.88
hr_izvoditi de_singen v 0.13
de_pille hr_lijek n 4.5
hr_talac de_gefangener n 5.75
hr_zanovijetati de_beschweren v 5.13
de_klavier hr_instrument n 6.0
de_trigonometrie hr_algebra n 0.38
hr_namještaj de_ruhesessel n 0.0
de_harfe hr_instrument n 5.88
hr_analizirati de_verschwenden v 0.0
de_bischof hr_kralj n 0.5
hr_krumpir de_tomate n 0.0
de_annehmen hr_nagađati v 4.5
hr_širina de_höhe n 0.0
de_szene hr_slika n 1.0
de_puma hr_mačka n 5.88
de_kessel hr_čajnik n 0.75
hr_tava de_geschirr n 4.5
hr_kralj de_führer n 5.38
de_heldin hr_žena n 5.25
hr_brak de_nadel n 0.0
de_helfen hr_dodati v 0.25
de_sellerie hr_hrana n 5.75
hr_suprug de_schlange n 0.0
hr_kofein de_kaffee n 0.0
de_kiefer hr_lice n 0.13
de_tod hr_kraj n 4.5
de_regenschirm hr_zaštita n 4.88
hr_sadašnjost de_zukunft n 1.25
hr_udariti de_rennen v 0.0
de_pfeffer hr_sol n 0.0
hr_životinja de_botschaft n 0.0
de_flöte hr_instrument n 5.88
hr_životinja de_lamm n 0.0
de_ei hr_mlijeko n 0.0
hr_zgrada de_dom n 0.0
de_sicherheit hr_opasnost n 0.13
hr_ladica de_schreibtisch n 0.0
