# Supplementary material
Source: ML conference proceedings conference paper supplement (https://aclanthology.org/P19-1490)
Supplement: Supplementary [file P19-1490.Supplementary.zip › graded-le/cross-lingual/hyperlex-hrit.txt]

Word1 Word2 POS AVG
it_edificio hr_konstrukcija N 4.75
hr_obmana it_frode N 5.38
it_alligatore hr_životinja N 6.0
it_granchio hr_životinja N 5.88
it_nota hr_sestrinstvo N 0.0
hr_jorgan it_coperta N 6.0
hr_koža it_materiale N 5.38
it_coniglio hr_životinja N 6.0
it_consigliare hr_razgovarati V 3.63
hr_brijest it_quercia N 0.0
it_bocca hr_lice N 0.0
it_colpire hr_promašiti V 0.0
hr_odbojka it_sport N 6.0
hr_smoking it_vestito N 5.88
it_impiegato hr_radnik N 5.5
hr_živcirati it_stuzzicare V 2.38
it_pino hr_drvo N 6.0
it_granito hr_kamen N 5.75
hr_zvijezda it_galassia N 0.13
hr_ažurirati it_far_sapere V 3.25
it_bottiglia hr_spremnik N 5.63
it_gioia hr_tuga N 0.0
hr_namještaj it_letto N 0.0
hr_tenis it_attivita' N 5.88
it_bagagliaio hr_automobil N 0.0
it_progetto hr_element N 0.0
it_forchetta hr_moda N 0.0
it_nemico hr_prijatelj N 0.13
it_stoppino hr_svijeća N 0.0
hr_filozofija it_studio N 5.63
it_ombrello hr_led N 0.0
it_carrozza hr_vlak N 0.0
hr_pjesma it_scritto N 4.25
hr_portret it_immagine N 5.75
hr_voda it_aria N 0.0
it_balena hr_špilja N 0.0
it_figlia hr_sin N 0.0
hr_princeza it_fortuna N 0.0
it_pinguino hr_životinja N 6.0
it_dirigente hr_osoba N 5.38
hr_požurivati it_dire V 2.38
it_unire hr_vjenčati V 0.38
it_strega hr_posao N 0.38
it_dissentire hr_složiti_se V 0.0
hr_znanost it_anatomia N 0.0
it_cena hr_hrana N 3.75
hr_pljoska it_contenitore N 5.63
it_canarino hr_ptica N 6.0
hr_znanost it_matematica N 0.0
hr_razgovarati it_comunicare V 5.88
it_guida hr_knjiga N 4.63
hr_stoka it_mandria N 1.5
it_intelletto hr_znanje N 2.63
it_cadavere hr_tijelo N 5.75
it_violino hr_viola N 0.0
hr_lord it_signora N 0.0
hr_plovilo it_veicolo N 4.38
it_tromba hr_instrument N 6.0
hr_kolt it_pistola N 5.75
it_corna hr_jelen N 0.0
hr_uho it_dipendente N 0.0
it_pesce hr_morski_pas N 0.0
it_pranzo hr_hrana N 3.0
it_trattore hr_kamion N 0.5
hr_novčić it_portafoglio N 0.0
hr_gradonačelnik it_persona N 5.63
it_insultare hr_povrijediti V 4.63
hr_šupljina it_dente N 0.0
it_mais hr_hrana N 5.75
it_palpebra hr_oko N 0.0
hr_biologija it_scienza N 6.0
hr_vući it_strattonare V 3.25
hr_zlostavljati it_maltrattare V 5.13
it_scalpello hr_alat N 6.0
hr_vjenčati it_unirsi V 5.25
it_biscotto hr_agrum N 0.0
it_vincitore hr_gubitnik N 0.0
hr_vrh it_punto N 4.25
it_istruzione hr_škola N 1.0
hr_instrument it_bisturi N 0.0
hr_pastrva it_pesce N 6.0
it_mobilio hr_krevet N 0.0
hr_banda it_gruppo N 5.75
it_salsiccia hr_hrana N 6.0
it_bussola hr_instrument N 4.88
hr_miš it_ratto N 0.0
it_rivolgersi hr_stajati V 0.0
hr_geologija it_studio N 5.13
hr_karfiol it_broccoli N 0.25
hr_gorila it_primate N 5.88
hr_pramac it_gabinetto N 0.0
it_selezione hr_izbor N 5.38
it_barattolo hr_spremnik N 5.5
it_fango hr_prljavština N 4.75
it_balena hr_sisavac N 5.88
it_venditore hr_osoba N 6.0
it_papero hr_ptica N 5.38
hr_zaposlenik it_lavoratore N 4.5
it_dovere hr_obaveza N 5.0
it_calcio hr_košarka N 0.13
hr_stopalo it_pianta N 0.0
it_cucinare hr_dinstati V 0.0
hr_deblo it_elefante N 0.0
it_movimento hr_akcija N 5.5
it_obbiettivo hr_uspjeh N 0.5
it_avere_successo hr_podbaciti V 0.0
hr_priznati it_negare V 0.0
it_portafoglio hr_aktovka N 0.38
it_pianta hr_repa N 0.0
it_meccanico hr_radnik N 6.0
it_strada hr_staza N 2.63
hr_rod it_sesso N 1.75
it_strumento hr_lopata N 0.0
it_cancello hr_izlaz N 4.25
it_sassofono hr_instrument N 6.0
it_simbolo hr_slovo N 0.0
hr_janje it_animale N 6.0
it_pallavolo hr_igra N 5.63
hr_osoba it_cittadino N 0.25
it_staccare hr_pričvrstiti V 0.0
hr_pizza it_cibo N 6.0
hr_čimpanza it_gorilla N 0.0
hr_farmer it_lavoratore N 5.88
it_mestiere hr_pletenje N 0.0
hr_oposum it_animale N 6.0
hr_tipkovnica it_computer N 0.0
it_governatore hr_političar N 5.88
it_sopraffare hr_savladati V 4.88
it_camera hr_bajka N 0.0
hr_odrezak it_cibo N 5.63
it_figura hr_datum N 0.0
it_caffeina hr_problem N 0.38
hr_muško it_femmina N 0.0
it_armadio hr_soba N 0.0
hr_plivati it_correre V 0.0
hr_saldo it_conto N 3.0
it_Plutone hr_planet N 6.0
hr_događaj it_biancheria N 0.0
hr_kritizirati it_fare_un'osservazione V 3.13
hr_rame it_corpo N 0.0
hr_pretvarati_se it_inzuppare V 0.0
hr_arhitektura it_acqua N 0.0
hr_nokat it_dito N 0.0
it_ostacolo hr_prepreka N 5.5
hr_vještica it_lavoro N 0.38
it_uovo hr_arhitektura N 0.0
it_incenso hr_aroma N 5.63
it_vista hr_percepcija N 4.5
it_urlare hr_govoriti V 4.63
hr_ugovor it_documento N 6.0
it_tristezza hr_otac N 0.0
hr_zmija it_debolezza N 0.0
it_scoppio hr_buka N 5.63
it_rapire hr_uzeti V 5.0
hr_potapšati it_toccare V 5.13
hr_udariti it_correre V 0.0
hr_slap it_tennis N 0.0
it_fratello hr_obitelj N 3.75
hr_krtica it_animale N 6.0
hr_otpadak it_pezzo N 4.63
hr_crvendać it_uccello N 6.0
hr_gušter it_animale N 6.0
hr_hladnjak it_palla N 0.0
hr_atlas it_enciclopedia N 2.88
it_rapa hr_biljka N 5.75
hr_stolica it_inizio N 0.0
hr_izgraditi it_fare V 5.5
hr_trač it_pettegolezzo N 5.88
hr_razlagati_se it_decomporsi V 5.75
it_frode hr_obmana N 5.88
hr_pliskavica it_balena N 5.0
hr_jagoda it_cibo N 5.5
it_messa hr_ceremonija N 4.75
hr_devet it_numero N 6.0
hr_deblo it_oasi N 0.0
it_cacciavite hr_alat N 6.0
it_toilette hr_aligator N 0.0
hr_tkivo it_osso N 0.0
hr_teletina it_cibo N 5.63
hr_idol it_persona N 3.38
hr_promišljati it_pensare V 5.63
it_cena hr_obrok N 5.5
it_morte hr_rođenje N 0.0
it_disoccupazione hr_zaposlenost N 0.0
hr_stopalo it_gamba N 0.13
hr_zaštita it_casco N 0.0
it_affrettarsi hr_pomaknuti V 5.5
it_quadrato hr_krug N 0.0
it_viaggio hr_putovanje N 5.88
hr_tekst it_poesia N 0.13
hr_prevara it_inganno N 5.88
hr_sjediti it_stare_in_piedi V 0.13
hr_pero it_porcospino N 0.0
hr_kombi it_veicolo N 6.0
hr_bogatstvo it_poverta' N 0.0
it_rompere hr_objasniti V 0.0
hr_životinja it_mammifero N 0.13
hr_šampion it_vincitore N 5.88
hr_kit it_grotta N 0.0
it_automobile hr_vozilo N 4.5
it_pensiero hr_razmišljanje N 4.0
it_bisturi hr_instrument N 5.38
hr_juha it_cibo N 5.5
it_fare_jogging hr_trčati V 5.63
hr_koža it_scamosciato N 0.0
it_tutu hr_suknja N 5.88
hr_razbojnik it_buio N 0.0
hr_grančica it_ramo N 5.5
hr_zakonodavstvo it_legione N 0.0
it_andarsene hr_ostati V 0.0
hr_pomaknuti it_rimorchiare V 0.25
it_principessa hr_bogatstvo N 0.0
it_farina hr_vjenčanje N 0.0
hr_slon it_mammifero N 6.0
hr_motocikl it_bicicletta N 1.0
hr_aspirin it_farmaco N 5.75
hr_prst it_pollice N 0.0
hr_vođa it_re N 0.13
hr_mačka it_mammifero N 6.0
it_manto_stradale hr_cesta N 0.13
hr_olimpijada it_evento N 6.0
it_piede hr_noga N 0.13
hr_jutro it_notte N 0.0
hr_svila it_cotone N 0.0
hr_stvoriti it_costruire V 1.5
hr_bakar it_ottone N 0.0
it_mito hr_mitologija N 1.38
it_ostaggio hr_zarobljenik N 5.75
hr_odjeljak it_parte N 4.75
it_toccare hr_zgrabiti V 0.25
hr_čipka it_scarpa N 0.0
it_opportunita' hr_prilika N 6.0
hr_dati it_prendere V 0.0
it_piacere hr_stado N 0.0
it_gruppo hr_osoblje N 0.0
it_idolo hr_osoba N 3.38
hr_oštrica it_tagliaerba N 0.0
hr_kraljevstvo it_territorio N 5.0
it_nicotina hr_duhan N 0.25
it_deserto hr_oaza N 0.25
hr_ulica it_via N 5.25
hr_rudar it_lavoratore N 6.0
it_daino hr_životinja N 6.0
hr_termin it_periodo N 3.75
it_ricchezza hr_siromaštvo N 0.0
hr_pročelje it_retro N 0.0
hr_pita it_cibo N 5.88
it_cucina hr_spavaonica N 0.0
it_gomma hr_materijal N 6.0
hr_reći it_suggerire V 0.25
it_infastidire hr_računati V 0.0
hr_slon it_lezione N 0.0
it_settimana hr_početak N 0.0
it_ricordarsi hr_pitati V 0.0
hr_limuzina it_auto N 5.63
hr_smijati_se it_piangere V 0.0
hr_odgoditi it_fretta V 0.0
it_biancheria_intima_da_donna hr_rublje N 6.0
it_torcia hr_svjetlo N 4.5
it_tamia hr_vjeverica N 6.0
hr_predsjednik it_capo N 5.0
it_colomba hr_ptica N 6.0
hr_dečko it_fidanzata N 0.0
hr_autostopirati it_viaggiare V 3.75
hr_dijamant it_gemma N 4.88
it_hockey hr_rečenica N 0.0
hr_zaudarati it_respingere V 0.0
it_paraurti hr_automobil N 0.0
hr_zamrzivač it_frigorifero N 2.75
hr_koža it_tessuto N 5.0
it_capitano hr_časnik N 4.0
it_argento hr_zlato N 0.0
it_farina hr_tijesto N 0.0
it_arrossire hr_razjasniti V 0.0
hr_kamen it_gioielli N 1.88
hr_osoba it_editore N 0.0
it_seta hr_saten N 1.5
hr_vid it_visione N 1.5
hr_misija it_incarico N 5.38
it_aggettivo hr_riječ N 6.0
hr_osjećaj it_ansia N 0.0
it_incarico hr_zadatak N 5.5
hr_gen it_cromosoma N 0.5
it_granata hr_boja N 5.88
hr_ovca it_mandria N 0.13
it_sindaco hr_osoba N 5.63
hr_autor it_scrittore N 1.13
it_scuola hr_obrazovanje N 4.38
hr_raspadati_se it_deteriorarsi V 4.38
it_gilet hr_košulja N 0.13
hr_građanin it_venditore N 0.13
it_abusare hr_maltretirati V 5.13
it_pittore hr_umjetnik N 6.0
it_terra hr_tvar N 5.13
hr_grožđe it_cibo N 5.63
it_punta hr_mač N 0.0
it_fragola hr_borovnica N 0.0
hr_deva it_animale N 6.0
it_valvola hr_srce N 0.0
hr_geologija it_pensiero N 0.5
it_autore hr_pisac N 1.13
it_panino hr_hrana N 6.0
it_planare hr_lebdjeti V 0.75
it_gioco hr_šah N 0.0
hr_sarma it_cibo N 5.88
it_pacchetto hr_omotnica N 0.75
it_conservare hr_zadržati V 4.38
hr_harfa it_strumento N 6.0
hr_pogubiti it_uccidere V 5.88
it_acciaio hr_oštrica N 0.5
hr_okrug it_paese N 1.0
it_capo hr_kralj N 0.13
it_collare hr_vrat N 0.0
it_vendere hr_kupiti V 0.0
it_canguro hr_životinja N 6.0
it_scritto hr_pjesma N 0.13
it_dizionario hr_knjiga N 5.5
hr_bubanj it_strumento N 6.0
hr_razred it_gruppo N 5.63
hr_krastavac it_cibo N 4.88
it_scamosciato hr_materijal N 5.75
it_corso_d'acqua hr_linija N 1.25
it_macchiare hr_zamrljati V 5.63
it_figura hr_kip N 1.13
hr_žeti it_ottenere V 2.75
hr_voda it_sostanza N 5.63
hr_sukob it_disaccordo N 4.88
hr_sjajiti it_brillare V 4.63
it_caporale hr_časnik N 4.38
hr_aligator it_animale N 6.0
it_autore hr_tvorac N 5.25
hr_sisavac it_animale N 5.88
it_corno hr_koza N 0.0
hr_bratstvo it_gruppo N 5.5
it_pelle hr_kosa N 0.0
it_rum hr_alkohol N 6.0
hr_bubnuti it_macinare V 0.0
it_maniera hr_stil N 4.75
it_raccomandare hr_savjetovati V 5.25
it_banana hr_voće N 6.0
it_marciapiede hr_površina N 4.75
it_grillo hr_životinja N 6.0
it_brontolare hr_žaliti_se V 4.63
it_ciabattino hr_pita N 0.0
hr_pažnja it_focus N 2.88
hr_crijevo it_fegato N 0.0
hr_telefon it_dispositivo N 6.0
hr_klub it_organizzazione N 5.25
it_quattro hr_dva N 0.0
hr_tikvica it_cibo N 5.75
it_jolly hr_karta N 6.0
hr_aroma it_profumo N 4.63
it_eleggere hr_odabrati V 5.63
hr_osoblje it_scuola N 0.0
hr_tama it_flanella N 0.0
hr_koza it_capretto N 0.0
hr_popraviti it_attaccare V 0.75
it_ciotola hr_tanjur N 1.25
hr_omesti it_trattenere V 1.88
it_tessuto hr_organ N 0.25
it_vaniglia hr_okus N 5.63
it_gas hr_automobil N 0.0
it_amaca hr_krevet N 3.5
it_ossigeno hr_voda N 0.0
it_macchina hr_začin N 0.0
it_polmone hr_organ N 6.0
it_accordo hr_neslaganje N 0.0
it_tunnel hr_prolaz N 4.88
it_atrio hr_svila N 0.0
hr_krater it_vulcano N 0.0
hr_zbor it_gruppo N 5.75
hr_noga it_sedia N 0.0
it_cura hr_terapija N 5.63
it_catturare hr_ugrabiti V 2.13
it_scienza hr_geologija N 0.0
hr_violina it_viola N 0.0
it_re hr_kraljica N 0.0
hr_utrka it_competizione N 5.63
hr_vrhunac it_storia N 0.0
hr_breskva it_Pera N 0.0
it_bretella hr_grudnjak N 0.0
hr_zaposlenje it_lavoro N 4.63
it_creatore hr_proizvođač N 2.13
hr_maslac it_crema N 3.5
hr_zadržati it_dare V 0.0
it_stufa hr_kat N 0.0
it_tuorlo hr_jaje N 0.0
hr_lanac it_collegamento N 4.13
it_tenente hr_hrabrost N 0.0
it_eroe hr_zlikovac N 0.0
hr_plesti it_tessere V 3.13
it_fiume hr_gospodar N 0.0
it_prugna_secca hr_voće N 6.0
hr_mahati it_muovere V 5.25
hr_služavka it_ragazza N 2.88
hr_rulja it_gruppo N 5.5
hr_kava it_latte N 0.0
hr_čelo it_viso N 0.0
hr_skvoš it_gioco N 5.75
hr_osjećaj it_estasi N 0.0
hr_baseball it_sport N 6.0
it_energia hr_glina N 0.0
hr_kivi it_frutta N 6.0
it_fluido hr_voda N 0.13
it_forza hr_sposobnost N 4.88
it_giudizio hr_presuda N 4.75
it_irritare hr_potrošiti V 0.25
hr_kruh it_cibo N 6.0
it_campo hr_stadion N 0.75
hr_šansa it_opportunita' N 6.0
it_banjo hr_instrument N 6.0
it_marciapiede hr_nogostup N 5.88
it_albero hr_šuma N 0.13
it_piuma hr_ptica N 0.0
it_permettere hr_vratiti V 0.0
hr_promatrati it_fermarsi V 0.13
hr_vjerovanje it_superstizione N 1.38
it_parte_posteriore hr_pročelje N 0.0
hr_bačvica it_contenitore N 4.75
it_secchio hr_kanta N 6.0
it_pizzicare hr_dodirnuti V 5.38
it_cigno hr_putovanje N 0.0
hr_uspjeti it_fallire V 0.0
hr_materijal it_pelle N 0.0
hr_trešnja it_uva N 0.0
hr_sef it_banca N 0.13
it_ghiaia hr_kamen N 5.38
it_fare_autostop hr_putovati V 3.75
hr_neuspjeh it_successo N 0.0
it_malattia hr_oboljenje N 5.88
it_esercito hr_demokracija N 0.0
hr_vila it_casa N 3.63
hr_članak it_dito N 0.25
hr_osuda it_giudizio N 4.75
it_scamosciato hr_koža N 5.75
hr_liječenje it_trattamento N 5.13
it_forcone hr_alat N 5.63
hr_svinja it_porco N 4.63
hr_znanost it_disciplina N 4.88
it_zero hr_broj N 6.0
hr_ujediniti it_aderire V 4.75
it_valore hr_iznos N 2.88
it_altoparlante hr_pakao N 0.0
hr_pojam it_idea N 3.5
hr_pokret it_attivita' N 5.63
hr_učitelj it_professionista N 4.63
it_gamba hr_ruka N 0.25
hr_glina it_mattone N 0.25
hr_film it_sole N 0.0
it_promettere hr_uspon V 0.0
hr_pločnik it_superficie N 4.75
it_scavatore hr_rudar N 2.25
it_cena hr_ladica N 0.0
hr_uređaj it_frigorifero N 0.0
hr_sonet it_poesia N 6.0
it_sposo hr_vjenčanje N 0.0
hr_tunel it_passaggio N 4.88
hr_brada it_capra N 0.0
hr_škrabati it_scrivere V 4.88
hr_postojanje it_vita N 2.0
hr_tipkovnica it_braccio N 0.0
it_frustrazione hr_bijes N 2.75
it_cotone hr_poliester N 0.0
hr_ruža it_pianta N 5.88
it_regno hr_teritorij N 5.0
it_casa hr_mjesto N 5.75
it_strega hr_žena N 5.38
it_anatra hr_životinja N 6.0
it_partire hr_stići V 0.38
hr_tvorac it_produttore N 2.13
it_testimoniare hr_reći V 5.5
hr_sok it_liquido N 5.63
it_pesce hr_grgeč N 0.0
hr_princeza it_principe N 0.0
hr_sadašnjost it_futuro N 0.5
it_umano hr_enciklopedija N 0.25
it_telefono hr_uređaj N 6.0
hr_zvučnik it_inferno N 0.0
it_mammifero hr_životinja N 5.88
hr_kamion it_veicolo N 6.0
it_saggio hr_odlomak N 0.25
hr_lipa it_moneta N 5.88
it_elemosinare hr_gucnuti V 0.0
it_sezione hr_dio N 4.75
it_essere_umano hr_životinja N 3.5
it_aggiornare hr_obavijestiti V 3.25
hr_postaviti it_presumere V 0.75
it_linguaggio hr_komunikacija N 5.5
it_pedale hr_bicikl N 0.0
hr_skupina it_personale N 0.0
hr_misao it_credenza N 1.25
it_ruscello hr_kisik N 0.0
hr_bjelančevina it_uovo N 0.0
hr_baseball it_calcio N 0.0
it_stallone hr_konj N 6.0
it_mandarino hr_jezgra N 0.0
it_frutta hr_trešnja N 0.0
it_idea hr_prijedlog N 1.75
it_metodista hr_baptist N 0.0
it_mese hr_godina N 0.13
it_palla hr_igra N 1.88
it_afferrare hr_uzeti V 5.0
it_bestiame hr_stado N 1.5
hr_zaboraviti it_negare V 0.5
it_limone hr_voće N 6.0
it_spuntino hr_hrana N 4.5
it_emicrania hr_bol N 4.88
it_impressione hr_avenija N 0.0
it_labbro hr_jezik N 0.0
hr_ulica it_viale N 0.25
it_svanire hr_iščeznuti V 5.5
hr_signal it_semaforo N 0.0
hr_krilo it_pelle N 0.0
hr_uštipnuti it_toccare V 5.38
hr_uzeti it_rapire V 1.25
it_coro hr_pjesma N 0.13
hr_završetak it_fine N 5.88
it_ferita hr_ozljeda N 5.5
it_impiegato hr_osoba N 5.88
hr_oružje it_pistola N 0.13
it_vitello hr_meso N 6.0
hr_kreda it_pastello N 2.0
hr_gomila it_pagliaio N 0.0
it_saggezza hr_znanje N 4.13
it_era hr_vrijeme N 5.25
it_compiti_a_casa hr_rad N 4.25
it_ragazza hr_dečko N 0.13
it_chirurgo hr_liječnik N 6.0
it_affermare hr_reći V 4.25
hr_gaza it_fasciatura N 5.25
it_agnello hr_životinja N 6.0
hr_oprostiti it_persuadere V 0.0
it_gufo hr_ptica N 6.0
it_contratto hr_sporazum N 5.5
it_gamba hr_stolica N 0.0
hr_kirurg it_medico N 6.0
it_mattina hr_inteligencija N 0.0
hr_vrijeme it_spazio N 0.38
it_elefante hr_životinja N 6.0
hr_uho it_capo N 0.0
hr_skica it_disegno N 5.5
it_congelatore hr_hladnjak N 2.75
hr_siromaštvo it_disciplina N 0.5
it_quattro hr_broj N 6.0
hr_razgovor it_comunicazione N 6.0
it_segnale hr_svjetlo N 0.0
it_tostapane hr_uređaj N 6.0
it_prodotto hr_luka N 0.0
hr_alat it_cacciavite N 0.0
it_progettista hr_tvorac N 4.88
it_sintomo hr_bolest N 0.5
it_arma hr_bodež N 0.0
hr_strijela it_ferita N 0.0
hr_vodič it_libro N 4.63
it_forma hr_prizma N 0.0
hr_kaplar it_ufficiale N 4.38
it_sedile hr_tron N 0.0
it_ammettere hr_poreći V 0.0
it_formaggio hr_maslac N 0.0
hr_novine it_mezzo_di_comunicazione N 5.88
hr_bor it_albero N 6.0
hr_zapovjednik it_capo N 5.38
it_maccheroni hr_hrana N 5.75
hr_pedala it_bicicletta N 0.0
it_sospettare hr_misliti V 4.5
it_allegare hr_spojiti V 3.25
hr_fond it_organizzazione N 4.88
hr_krilo it_angelo N 0.0
it_cricket hr_igra N 5.75
hr_prodavač it_persona N 6.0
hr_sandala it_scarpa N 6.0
it_discutere hr_razgovor V 5.25
hr_galeb it_uccello N 6.0
it_scalino hr_stubište N 0.13
it_sottrazione hr_rezidencija N 0.0
hr_Saturn it_pianeta N 6.0
it_ufficiale hr_zakon N 0.38
it_latte hr_maslac N 0.0
it_quercia hr_bor N 0.0
it_riordinare hr_organizirati V 3.88
hr_materijal it_nylon N 0.0
hr_staza it_leopardo N 0.0
hr_odgoditi it_mostrare V 0.0
it_insetto hr_stvorenje N 6.0
hr_dominirati it_controllare V 4.0
hr_hrana it_orzo N 0.0
hr_flauta it_strumento N 6.0
hr_greda it_supporto N 4.75
it_arpa hr_instrument N 6.0
hr_natjecanje it_gara N 1.38
hr_bobica it_ciliegia N 0.0
it_fare hr_izgraditi V 0.88
hr_šupljina it_ratto N 0.0
it_coniglio hr_sinagoga N 0.0
it_Gesu' hr_gospodin N 5.0
it_golf hr_igra N 5.63
hr_protivnik it_coro N 0.0
hr_kiša it_doccia N 0.0
hr_bjelančevina it_latte N 0.0
hr_dan it_settimana N 0.0
hr_svjetlost it_aura N 0.25
it_sedia hr_namještaj N 6.0
hr_usna it_bocca N 0.0
it_camera_da_letto hr_dom N 0.38
it_tecnico hr_radnik N 5.63
hr_crtež it_schizzo N 0.0
hr_vući it_spingere V 0.38
it_orecchino hr_prsten N 0.13
it_artista hr_tvorac N 5.38
it_dare_un'occhiata hr_buljiti V 1.0
hr_glazba it_suono N 5.88
hr_profesor it_facolta' N 0.0
hr_uništiti it_uccidere V 0.63
hr_anatomija it_scienza N 5.38
hr_truba it_strumento N 6.0
hr_odvojiti it_attaccare V 0.0
hr_vuk it_creatura N 5.63
hr_imenica it_aggettivo N 0.0
hr_makaroni it_cibo N 5.75
hr_bodež it_coltello N 5.0
it_dito hr_palac N 0.0
hr_kopač it_minatore N 2.25
it_birra hr_tekućina N 6.0
it_riservare hr_zadržati V 3.38
hr_osoba it_proprietario N 0.0
hr_napomenuti it_uccidere V 0.13
it_pasta hr_tijesto N 3.88
hr_neboder it_incontro N 0.13
it_geometria hr_matematika N 5.5
hr_političar it_senatore N 0.0
hr_djevojka it_ragazzo N 0.13
it_dare hr_uzeti V 0.0
hr_krafna it_cibo N 5.88
hr_krivnja it_innocenza N 0.0
hr_pokopati it_coprire V 4.13
hr_zmija it_animale N 5.88
hr_zujati it_volare V 2.5
hr_manjina it_gabinetto N 0.0
it_spruzzare hr_ulijevati V 1.63
hr_cilj it_successo N 0.5
hr_vuna it_stoffa N 6.0
hr_milja it_pollice N 0.0
it_tenere hr_rezervirati V 2.0
it_seguire_le_tracce hr_slijediti V 5.0
it_trainare hr_reći V 0.13
it_stupro hr_zločin N 6.0
it_fascino hr_privlačnost N 4.75
it_pazienza hr_nestrpljenje N 0.0
hr_duga it_cielo N 0.38
hr_oduzeti it_moltiplicare V 0.0
hr_orada it_pesce N 6.0
it_parete hr_odjel N 0.25
hr_buktinja it_fiamma N 5.38
hr_hraniti it_morire_di_fame V 0.0
it_fallimento hr_uspjeh N 0.0
it_elio hr_plin N 6.0
it_riservare hr_držati V 3.0
it_laurea hr_ceremonija N 4.13
it_tessuto hr_kost N 0.0
hr_repa it_pianta N 5.75
hr_pluća it_organo N 6.0
hr_sjever it_direzione N 5.88
hr_trbuh it_corpo N 0.0
it_trapunta hr_pokrivač N 6.0
hr_uloviti it_sequestrare V 2.25
hr_skrenuti it_differire V 0.5
it_chimica hr_znanost N 5.88
hr_sestrinstvo it_organizzazione N 5.75
it_cancro hr_bolest N 6.0
hr_spavaćica it_biancheria_intima N 3.5
hr_obrazovanje it_scuola N 1.0
hr_širina it_altezza N 0.0
hr_oduzimanje it_villa N 0.0
hr_životinja it_messaggio N 0.0
hr_palac it_dito N 6.0
it_pesca hr_voće N 6.0
it_poesia hr_sonet N 0.25
it_abilita' hr_snaga N 2.63
hr_ručak it_colazione N 0.13
it_rilasciare hr_zadržati V 0.0
hr_geologija it_scienza N 6.0
it_amico hr_protivnik N 0.0
it_navigatore hr_istraživač N 3.25
hr_lopatica it_pala N 4.88
hr_otac it_violino N 0.0
it_cittadino hr_prodavač N 0.13
it_pollice hr_prst N 6.0
it_incenso hr_miris N 5.38
it_cacciavite hr_čekić N 0.0
hr_glava it_corpo N 0.0
hr_maslina it_cibo N 5.75
it_torcia_elettrica hr_agencija N 0.0
hr_sići it_creare V 0.0
hr_greben it_picco N 2.13
hr_intelekt it_conoscenza N 2.63
hr_noga it_braccio N 0.25
hr_računati it_valutare V 2.0
hr_aritmetika it_lattuga N 0.0
it_mamma hr_roditelj N 6.0
hr_odreći_se it_sconfiggere V 0.25
it_strada hr_put N 5.25
hr_cvijet it_canguro N 0.0
it_comitato hr_skupina N 5.63
hr_poručnik it_coraggio N 0.0
it_marito hr_zmija N 0.0
it_libro hr_enciklopedija N 0.0
it_colonnello hr_časnik N 4.38
it_servo hr_rob N 2.25
hr_balkon it_veranda N 2.38
hr_peraja it_pesce N 0.0
it_strumento hr_tuba N 0.0
it_gioco_di_parole hr_humor N 4.88
it_discorso hr_jezik N 1.88
hr_diploma it_cerimonia N 4.13
hr_potkrovlje it_casa N 0.38
hr_svila it_raso N 1.5
it_autista hr_truba N 0.0
it_valigia hr_torba N 4.0
hr_ubrzati it_ammettere V 0.0
it_fungo hr_ljubaznost N 0.0
it_flanella hr_materijal N 5.63
hr_igračka it_giocattolo N 6.0
it_cerimonia hr_pogreb N 0.0
it_perdonare hr_uvjeriti V 0.0
it_dire hr_tvrditi V 3.0
it_equipaggio hr_skupina N 4.88
hr_ujediniti it_sposare V 0.38
hr_lijek it_farmaco N 6.0
hr_žena it_arte N 0.25
hr_zora it_giorno N 1.63
hr_piramida it_forma N 5.88
it_desiderare hr_odvojiti V 0.0
it_cactus hr_biljka N 6.0
hr_kvadrat it_forma N 6.0
it_dividere hr_pribaviti V 0.13
it_persona hr_penjač N 0.13
it_ingoiare hr_prodavati V 0.0
it_forno hr_uređaj N 6.0
it_pelle hr_antilop N 0.0
hr_reći it_affermare V 3.0
it_chimica hr_nož N 0.0
hr_tijelo it_cadavere N 0.38
hr_nevjesta it_nozze N 0.0
it_ramoscello hr_grana N 5.5
hr_obrazovati it_far_sapere V 4.0
it_vasca hr_kupaonica N 0.25
hr_migrena it_mal_di_testa N 5.63
it_schiena hr_tijelo N 0.0
hr_nezaposlenost it_occupazione N 0.0
hr_ukloniti it_scaricare V 0.63
it_atmosfera hr_ubojica N 0.0
it_prugna hr_kruška N 0.0
it_posizione hr_lokacija N 4.75
it_protezione hr_kaciga N 0.0
hr_staklenka it_contenitore N 5.5
it_mammifero hr_mačka N 0.0
it_cavallo hr_tim N 0.0
hr_kobra it_serpente N 6.0
hr_dati it_lasciare V 1.38
hr_zaključak it_inizio N 0.13
it_burro hr_krema N 3.5
it_ramino hr_igra N 5.88
it_erba hr_bundeva N 0.0
it_pipistrello hr_životinja N 6.0
it_vicolo hr_cesta N 5.5
hr_rov it_fosso N 5.38
hr_orangutan it_bestia N 3.75
it_legione hr_skupina N 5.38
it_cavalcare hr_hodati V 0.25
hr_ptica it_papero N 0.38
it_assenza hr_medicina N 0.0
hr_tenor it_perdente N 0.0
it_video hr_televizija N 0.13
it_toccare hr_uštipnuti V 0.0
hr_životinja it_rettile N 0.13
it_forma hr_sfera N 0.13
it_porzione hr_količina N 5.38
hr_prst it_guanto N 0.0
hr_odrastao it_bambino N 0.25
hr_rastaviti it_bruciare V 0.38
hr_motor it_treno N 0.0
it_avanzare hr_povlačiti_se V 0.0
it_acqua hr_zrak N 0.0
it_ala hr_ptica N 0.0
hr_ljuljati it_mettere V 0.0
it_strabuzzare_gli_occhi hr_gledati V 5.38
hr_porezotina it_ferita N 5.88
hr_kikiriki it_anacardo N 0.0
hr_zavoj it_superstizione N 0.0
it_acero hr_drvo N 6.0
it_medico hr_kirurg N 0.5
it_restituire hr_poslati V 1.25
it_piede hr_biljka N 0.0
it_poesia hr_tekst N 4.25
hr_pitati it_elemosinare V 0.5
hr_roditelj it_famiglia N 4.25
hr_nikotin it_tabacco N 0.25
hr_plast it_vincitore N 0.0
it_verde hr_plava N 0.13
hr_sport it_attivita' N 5.88
hr_bakar it_bronzo N 0.38
it_patata hr_rajčica N 0.0
hr_ekstremitet it_gamba N 0.0
it_osservare hr_zaustaviti V 0.13
hr_kornjača it_animale N 6.0
hr_fokus it_attenzione N 4.75
hr_staviti it_dare V 0.38
hr_kupac it_persona N 5.13
hr_majka it_padre N 0.0
hr_čudovište it_bestia N 3.75
it_reazione hr_posljedica N 3.63
it_comunicazione hr_razgovor N 0.88
it_simpatia hr_osjećaj N 5.5
it_competenza hr_rat N 0.0
it_nave hr_vozilo N 4.38
it_salsa hr_sos N 5.63
it_integrare hr_miješati V 2.5
hr_krađa it_aggiunta N 0.0
it_sentimento hr_empatija N 0.38
it_polpetta hr_hrana N 5.88
hr_štuka it_corno N 0.0
it_frigorifero hr_lopta N 0.0
it_cotone hr_tkanina N 5.5
hr_sardina it_cibo N 5.5
it_antidoto hr_lijek N 5.63
it_adulto hr_dijete N 0.25
it_uccidere hr_ugušiti V 0.0
hr_violina it_violoncello N 0.0
it_lavastoviglie hr_uređaj N 5.75
hr_glavobolja it_sintomo N 5.13
it_statua hr_umjetnost N 4.38
hr_mjesec it_anno N 0.13
hr_stijena it_roccia N 4.63
it_nozione hr_ideja N 3.5
it_gorilla hr_primat N 5.88
hr_zec it_animale N 6.0
hr_slon it_animale N 6.0
it_emicrania hr_glavobolja N 5.63
hr_dabar it_animale N 6.0
hr_njihati_se it_muoversi V 5.63
it_sigaretta hr_duhan N 2.13
hr_crtanje it_dipinto N 4.38
it_canna hr_orgulje N 0.0
it_far_finta hr_namočiti V 0.0
it_cameriera hr_radnica N 5.88
it_aceto hr_kiselina N 4.13
it_frustrare hr_iritirati V 3.38
hr_razumijevanje it_conoscenza N 2.5
hr_kemičar it_scienziato N 5.63
it_motociclo hr_vozilo N 6.0
it_superstizione hr_vjerovanje N 5.38
hr_barakuda it_pesce N 5.88
hr_dečko it_amante N 3.88
it_materiale hr_najlon N 0.0
it_scimmia hr_humor N 0.0
it_ufficiale hr_kaplar N 0.38
hr_otok it_terra N 3.5
it_inventare hr_stvoriti V 5.0
hr_djevojka it_persona N 6.0
hr_čeljust it_viso N 0.13
it_operazione hr_duh N 0.0
it_nucleo hr_atom N 1.0
hr_ustati it_scendere V 0.0
it_nord hr_jug N 0.0
it_birra hr_piće N 6.0
it_ramo hr_drvo N 0.25
hr_lopata it_strumento N 4.88
it_scultura hr_crtež N 0.13
it_unirsi hr_združiti V 4.75
hr_fitilj it_candela N 0.0
it_grilletto hr_pištolj N 0.0
hr_zahod it_comunicazione N 0.0
it_pace hr_rat N 0.0
it_barracuda hr_riba N 5.88
hr_gležanj it_gamba N 0.0
it_bevanda_frizzante hr_piće N 6.0
it_dare_un'occhiata hr_gledati V 5.88
it_forcone hr_smjesa N 0.0
hr_janje it_pecora N 5.5
it_dare hr_pustiti V 1.38
hr_iglu it_capanna N 3.63
hr_skulptura it_disegno N 0.13
it_cavallo hr_pastuh N 0.0
hr_šarm it_attrattivita' N 4.75
it_risposta hr_pitanje N 0.19
it_piacere hr_bol N 0.0
hr_uhvatiti it_sequestrare V 2.0
it_stetoscopio hr_instrument N 6.0
it_furia hr_ljutnja N 5.25
it_poverta' hr_disciplina N 0.5
hr_erodirati it_deteriorare V 2.63
it_discorso hr_predavanje N 3.13
hr_toster it_apparecchio N 6.0
it_programma hr_plan N 4.38
hr_dragulj it_anello N 0.0
it_comandante hr_poručnik N 0.5
it_caffeina hr_čaj N 0.0
hr_dizajnirati it_disegnare V 1.5
it_pepe hr_sol N 0.0
it_mostro hr_zvijer N 3.75
it_accettare hr_obnoviti V 0.25
it_bambino hr_kćer N 0.0
it_divano hr_sofa N 5.88
it_lampada hr_stol N 0.0
hr_vozač it_corna N 0.0
hr_tehnologija it_conoscenza N 2.63
hr_tepih it_tappeto N 6.0
hr_rak it_animale N 5.88
hr_orhideja it_fiore N 6.0
it_portafoglio hr_lisnica N 5.88
it_tesi hr_izjava N 4.63
it_sopraffare hr_poraziti V 3.38
it_cavo hr_linija N 3.0
hr_pljoska it_bottiglia N 5.13
hr_grana it_albero N 0.25
it_cofanetto hr_kutija N 5.5
hr_deterdžent it_detersivo N 5.0
hr_biologija it_studio N 5.63
it_buio hr_svjetlo N 0.38
hr_slika it_televisione N 0.0
hr_uzdizati_se it_partire V 0.0
hr_zapad it_direzione N 6.0
hr_osoba it_cassiere N 0.0
it_sconfiggere hr_odreći_se V 0.0
it_rosa hr_biljka N 5.88
it_bambino hr_obitelj N 1.88
it_dominare hr_kontrolirati V 4.0
it_furto hr_dodatak N 0.0
hr_figura it_statua N 1.13
hr_rak it_frutti_di_mare N 5.5
hr_povrće it_spinaci N 0.0
hr_ozon it_atmosfera N 1.38
hr_dotaknuti it_dare_una_pacca V 0.0
hr_maskara it_rossetto N 0.0
hr_Pluton it_pianeta N 6.0
it_lente_a_contatto hr_leća N 5.75
it_coniglietto hr_zec N 6.0
hr_ladica it_cassapanca N 0.13
hr_radnik it_contadino N 0.0
hr_okriviti it_accusare V 5.25
it_soffitta hr_kuća N 0.38
hr_fiziologija it_studio N 5.63
it_hamburger hr_hrana N 6.0
it_nuotare hr_tonuti V 0.25
hr_blagajnik it_persona N 5.75
hr_napustiti it_controllare V 0.13
it_tirare_lo_sciacquone hr_isprati V 4.88
hr_gozba it_raduno N 5.0
it_marciapiede hr_staza N 4.13
it_cuore hr_intelekt N 0.0
hr_tuga it_gioia N 0.0
hr_kćer it_femmina N 5.75
hr_lanac it_secchio N 0.0
it_punta hr_strijela N 0.0
hr_šljunak it_pietra N 5.38
it_apparecchio hr_mikrovalna N 0.0
it_caratteristica hr_lice N 0.0
it_delfino hr_sisavac N 6.0
it_auto hr_vozilo N 6.0
it_gallo hr_pile N 0.5
it_limousine hr_vozilo N 5.88
hr_gajde it_organo N 0.0
hr_softball it_calcio N 0.0
it_cassetto hr_škrinja N 0.13
hr_izabrati it_scegliere V 5.63
it_vasca_da_bagno hr_kupaonica N 0.0
hr_puž it_coraggio N 0.0
it_avvertire hr_savjetovati V 4.13
it_acqua hr_lokva N 0.0
it_intestino hr_jetra N 0.0
it_servitore hr_konobarica N 0.75
hr_krilo it_pipistrello N 0.0
hr_grašak it_cibo N 5.88
hr_uplata it_affitto N 0.0
it_disaccordo hr_sukob N 4.75
hr_iver it_pezzo N 3.63
it_corpo hr_leš N 0.38
it_gatto hr_izgled N 0.13
it_panchina hr_sjedalo N 5.63
hr_nesposobnost it_capacita' N 0.0
it_diamante hr_dragulj N 4.88
hr_udariti it_bastone N 4.25
hr_čitatelj it_persona N 5.75
it_lecca-lecca hr_slatkiš N 5.63
hr_pogledati it_fissare V 1.0
hr_prihvatiti it_permettere V 2.88
it_sensazione hr_ekstaza N 0.0
it_innocenza hr_grožđe N 0.0
it_merluzzo hr_riba N 6.0
it_negare hr_odbiti V 3.5
it_principessa hr_princ N 0.0
hr_mačka it_animale N 6.0
it_pallavolo hr_sport N 6.0
hr_labud it_viaggio N 0.0
hr_glava it_freccia N 0.0
hr_stvorenje it_insetto N 0.0
hr_radnica it_cameriera N 0.0
it_kiwi hr_voće N 6.0
hr_odbojka it_attivita' N 5.75
hr_kiselina it_conchiglia N 0.0
it_lode hr_odobravanje N 5.38
it_coniglio hr_hrana N 4.5
hr_vijesti it_informazione N 5.25
hr_smog it_inquinamento N 5.5
hr_izgraditi it_rompere V 0.0
hr_flanel it_materiale N 5.63
it_garza hr_zavoj N 5.25
hr_izlet it_viaggio N 5.88
it_antenato hr_otac N 0.13
it_destino hr_mornar N 0.0
it_inventare hr_napraviti V 3.75
hr_mama it_genitore N 6.0
it_orecchio hr_zaposlenik N 0.0
it_seno hr_grudi N 4.0
hr_oko it_viso N 0.0
hr_natjecanje it_calcolatrice N 0.13
hr_postolar it_torta N 0.0
it_sbaglio hr_vladar N 0.0
it_balcone hr_trijem N 2.38
it_benessere hr_korist N 3.5
hr_kofein it_caffe' N 0.0
hr_diktator it_sovrano N 5.88
hr_lijek it_causa N 0.0
hr_prsa it_tacchino N 0.38
hr_stručnost it_guerra N 0.0
it_movimento hr_kretanje N 5.63
it_sviluppare hr_napraviti V 4.25
it_casco hr_džep N 0.0
hr_društvo it_organizzazione N 3.88
hr_kriviti it_mettere V 0.0
it_rinunciare hr_promijeniti V 2.25
hr_prilog it_sostantivo N 0.0
hr_obrana it_attacco N 0.13
hr_slovo it_alfabeto N 0.0
it_rame hr_mjed N 0.0
hr_zalistak it_cuore N 0.0
it_signora hr_dvorac N 0.0
it_carota hr_hrana N 5.88
it_dire hr_preporučiti V 0.13
it_trainare hr_maknuti V 4.63
it_maiale hr_prase N 4.63
it_tacco hr_stopalo N 0.0
it_frigorifero hr_uređaj N 6.0
hr_tamjan it_profumo N 5.63
it_parete hr_soba N 0.0
hr_palačinka it_cialda N 0.25
it_ballo_studentesco hr_zabava N 5.88
hr_limuzina it_emicrania N 0.0
it_muovere hr_njihati V 0.0
hr_simptom it_malattia N 0.5
hr_zanovijetati it_lamentarsi V 4.63
hr_mlijeko it_burro N 0.0
hr_ladica it_scrivania N 0.0
it_coda hr_voda N 0.0
it_schioccare hr_iskočiti V 0.88
hr_gledati it_dare_un'occhiata V 1.0
hr_profesor it_professionista N 4.25
hr_tipkovnica it_organo N 0.0
hr_pastuh it_cavallo N 6.0
hr_dobrobit it_vantaggio N 3.5
it_pala hr_alat N 4.88
it_fiore hr_klokan N 0.0
it_azoto hr_vodik N 0.0
it_brodo hr_hrana N 5.63
hr_sat it_vita N 0.0
it_soglia hr_rub N 3.63
it_bocca hr_svemir N 0.0
hr_simptom it_orchidea N 0.0
hr_konj it_mammifero N 6.0
hr_tjeskoba it_sentimento N 6.0
hr_tele it_animale N 6.0
hr_žena it_eroina N 0.38
hr_tvrditi it_dire V 4.25
it_storia hr_dragulj N 0.0
hr_dužnost it_obbligo N 5.0
hr_vjenčati it_unire V 5.63
hr_sotona it_Dio N 1.0
hr_celer it_verdura N 6.0
hr_oboa it_strumento N 6.0
hr_dosjetka it_umorismo N 4.88
it_quercia hr_ogrlica N 0.0
hr_krug it_forma N 6.0
it_fiocchi_d'avena hr_hrana N 5.5
it_rimuovere hr_istovariti V 0.63
it_riso hr_hrana N 5.88
it_rinunciare hr_poraziti V 0.25
it_scongelare hr_rastopiti V 3.88
hr_rubin it_gioiello N 5.75
it_rinviare hr_pokazati V 0.0
hr_ocat it_acido N 4.13
hr_mladoženja it_nozze N 0.0
hr_peršin it_cibo N 5.13
hr_puška it_arma N 6.0
it_culla hr_liječenje N 0.13
hr_čovjek it_animale N 3.5
it_ascendere hr_popeti_se V 2.13
hr_dobiti it_scoppiare V 0.0
hr_pustinja it_oasi N 0.25
it_decomporsi hr_propadati V 4.38
it_ala hr_šišmiš N 0.0
it_ipotesi hr_teorija N 3.63
it_sgabello hr_početak N 0.0
hr_regija it_compagno N 0.0
hr_količnik it_quantita' N 4.0
it_poliziotto hr_službenik N 5.5
it_accelerare hr_priznati V 0.0
it_orecchio hr_glava N 0.0
it_concorrenza hr_kalkulator N 0.13
hr_ručak it_cena N 0.13
it_palcoscenico hr_razbojnik N 0.0
it_animale hr_patka N 0.0
it_strada hr_bulevar N 0.25
hr_dobit it_perdita N 0.0
it_comunita'_di_donne hr_organizacija N 5.75
hr_hladnjak it_apparecchio N 6.0
hr_isus it_signore N 5.0
hr_radnik it_falegname N 0.0
hr_smokva it_data N 0.0
hr_sposobnost it_comando N 0.38
hr_vodik it_elio N 0.0
hr_trgovina it_negozio N 5.88
hr_kompas it_strumento N 4.88
hr_pločnik it_strada N 0.13
hr_akson it_neurone N 0.0
it_occupazione hr_posao N 4.63
hr_frustrirati it_irritare V 3.38
hr_isplahnuti it_sciacquare V 4.88
hr_zadržati it_mettere_da_parte V 2.0
hr_uhvatiti it_tenere V 4.0
it_muratore hr_radnik N 6.0
it_padre hr_sin N 0.25
hr_ugovor it_accordo N 5.5
it_cercare hr_pregledati V 0.0
it_procione hr_životinja N 6.0
it_sottrarre hr_pomnožiti V 0.0
it_sfera hr_globus N 0.5
it_scendere hr_stvoriti V 0.0
hr_gnjaviti it_contare V 0.0
it_canna hr_pištolj N 0.0
it_nord hr_smjer N 5.88
hr_lanac it_serratura N 2.25
it_sandalo hr_cipela N 6.0
it_nylon hr_materijal N 6.0
it_barba hr_koza N 0.0
it_apparecchio hr_hladnjak N 0.0
it_idrogeno hr_helij N 0.0
hr_kanta it_barile N 1.13
it_pentimento hr_tuga N 1.75
it_fiamma hr_zadovoljstvo N 0.25
it_taglio hr_ozljeda N 5.88
it_rifiutare hr_zamazati V 0.0
it_integrita' hr_radnik N 0.0
it_analizzare hr_upropastiti V 0.0
hr_biljka it_fiore N 0.0
hr_šunka it_cibo N 5.75
it_aspirina hr_lijek N 5.75
hr_bjelančevina it_carne N 0.0
hr_plivati it_affondare V 0.25
it_balena hr_kriket N 0.0
it_prezzo hr_vrijednost N 4.75
it_vanga hr_lopata N 4.88
hr_očna_jabučica it_occhio N 1.75
hr_zgrada it_costruzione N 4.75
hr_zamazati it_macchiare V 5.63
hr_štene it_animale N 5.63
hr_sluga it_schiavo N 2.25
hr_ujak it_zia N 0.0
hr_objasniti it_esprimere V 4.0
hr_baklja it_luce N 4.5
it_cerchio hr_oblik N 6.0
it_pioggia hr_pljusak N 0.0
it_torrente hr_voda N 4.88
it_olmo hr_hrast N 0.0
it_aereo hr_top N 0.0
it_felicita' hr_emocija N 6.0
it_spiegare hr_izraziti_se V 4.0
it_cavita' hr_štakor N 0.0
it_mantella hr_plašt N 3.13
hr_vile it_miscela N 0.0
hr_pojam it_costituzione N 0.25
hr_prtljažnik it_auto N 0.0
it_numero hr_osam N 0.0
it_avverbio hr_imenica N 0.0
hr_pjevač it_prova N 0.0
it_catena hr_veza N 4.31
hr_pokajanje it_pentimento N 5.38
hr_osoba it_persone N 1.0
hr_ručak it_violino N 0.0
it_fronte hr_pozadina N 0.0
hr_željezo it_acciaio N 0.0
hr_vikati it_parlare V 4.63
it_domani hr_jučer N 0.38
hr_blato it_sporco N 4.75
hr_suton it_crepuscolo N 5.63
it_giornale hr_časnik N 0.38
it_bastone hr_stabljika N 0.0
hr_vojska it_democrazia N 0.0
it_polso hr_ruka N 0.0
it_descrivere hr_objasniti V 4.38
it_pasto hr_nalivpero N 0.0
hr_osam it_numero N 6.0
hr_šljiva it_pera N 0.0
hr_baletna_suknjica it_gonna N 5.88
it_detergente hr_čistač N 5.0
hr_slikar it_artista N 6.0
hr_osiguranje it_sicurezza N 3.88
hr_zamazati it_pulire V 0.0
it_staccare hr_razdvojiti V 5.38
it_figlia hr_žensko N 5.75
it_regina hr_tuš N 0.0
hr_potok it_ossigeno N 0.0
hr_pohvala it_approvazione N 5.38
it_dati hr_informacija N 5.38
hr_raspored it_piano N 4.38
it_oncia hr_mjera N 5.88
it_jazz hr_glazba N 6.0
it_punizione hr_nagrada N 0.25
hr_sfera it_globo N 0.5
it_sensazione hr_tjeskoba N 0.0
hr_namještaj it_sedia N 0.0
it_persona hr_govornik N 0.25
it_inquinamento hr_čamac N 0.0
hr_pas it_animale N 6.0
it_attraversamento hr_cesta N 2.13
it_peso hr_količina N 3.63
it_avena hr_žitarica N 6.0
hr_patka it_uccello N 5.5
it_eseguire hr_pjevati V 0.63
it_borsa hr_konobar N 0.0
hr_najlon it_cotone N 0.0
it_petto hr_purica N 0.38
it_borsetta hr_torba N 5.63
hr_galon it_misura N 5.88
it_gruppo hr_zbor N 0.38
it_tessuto hr_pamuk N 0.0
it_prezzemolo hr_hrana N 5.13
hr_policija it_autorita' N 3.75
hr_zid it_barriera N 4.88
it_taxi hr_taksi N 6.0
hr_policajac it_ufficiale N 5.5
it_cammello hr_životinja N 6.0
hr_jezik it_bocca N 0.0
hr_dušik it_idrogeno N 0.0
hr_ulica it_gamberetto N 0.0
hr_voda it_liquido N 5.88
hr_kit it_mammifero N 5.88
it_cobra hr_zmija N 6.0
it_viale hr_ulica N 5.63
it_dilettante hr_raj N 0.0
hr_zelena it_giallo N 0.13
hr_legija it_gruppo N 5.38
hr_prihvatiti it_scricchiolare V 0.13
hr_predvorje it_seta N 0.0
hr_zub it_sega N 0.38
hr_bubreg it_organo N 6.0
hr_ograničenje it_confine N 4.5
hr_pretpostaviti it_pensare V 4.5
hr_pokret it_movimento N 5.63
hr_bulevar it_strada N 5.56
it_midollo hr_kost N 0.75
it_bulbo_oculare hr_oko N 1.75
it_bramare hr_željeti V 5.38
it_dimenticare hr_umanjiti V 0.75
hr_rak it_malattia N 6.0
hr_dijete it_figlia N 0.0
it_cucciolo hr_životinja N 5.63
it_dente hr_pila N 0.38
it_club hr_bratstvo N 1.5
it_confraternita hr_grupa N 5.5
it_tastiera hr_računalo N 0.0
it_calabrone hr_osa N 0.13
hr_cvjetača it_cibo N 5.88
it_servizio hr_pogreška N 0.0
hr_iseliti it_trasferire V 2.88
hr_razgovarati it_consigliare V 0.0
hr_uređaj it_lavastoviglie N 0.0
it_bicchiere hr_ormar N 0.0
it_serpente hr_gmaz N 5.88
hr_naušnica it_anello N 0.13
it_valigia hr_prtljaga N 5.88
hr_povrće it_pomodoro N 0.0
it_atto hr_drama N 0.0
hr_zima it_estate N 0.0
hr_prodati it_acquistare V 0.0
it_sgabello hr_zahod N 0.0
it_scoprire hr_pronaći V 4.5
it_addome hr_tijelo N 0.0
hr_zagađenje it_barca N 0.0
it_contare hr_vrednovati V 2.0
it_birra hr_alkohol N 5.88
hr_točka it_matita N 0.0
hr_snaga it_capacita' N 4.88
it_tenente hr_časnik N 3.88
it_lama hr_kosilica N 0.0
hr_baciti it_infastidire V 0.5
hr_kupus it_insalata N 6.0
it_maschio hr_žensko N 0.0
hr_patka it_animale N 6.0
it_silenzio hr_zvuk N 1.5
it_paradiso hr_pakao N 0.0
hr_keks it_agrume N 0.0
hr_konj it_squadra N 0.0
it_mettere hr_dati V 0.38
hr_glava it_piede N 0.0
it_pelle hr_tkivo N 5.0
it_didascalia hr_tehnika N 0.5
it_fico hr_hrana N 5.63
hr_slap it_fiume N 2.13
hr_srebro it_oro N 0.0
it_cattedrale hr_građevina N 5.75
hr_odabir it_scelta N 5.38
hr_predvorje it_edificio N 0.38
it_assassino hr_ubojica N 5.88
it_fagiolo hr_povrće N 4.5
hr_tkanina it_seta N 0.0
it_metro hr_jedinica N 5.88
it_corno hr_bik N 0.0
it_desiderare hr_napad V 0.0
it_fisiologia hr_područje N 5.63
it_capire hr_prihvatiti V 2.0
hr_pik it_carta N 4.0
it_toilette hr_komunikacija N 0.0
hr_kokice it_cibo N 5.13
it_zucca hr_tikva N 5.63
hr_težina it_quantita' N 3.63
hr_baterija it_agenzia N 0.0
hr_plavo it_colore N 6.0
it_smog hr_zagađenje N 5.5
hr_jedinica it_gruppo N 2.25
hr_bicikl it_veicolo N 6.0
it_cambiare hr_uvjeriti V 0.25
it_proteina hr_jaje N 0.0
hr_braniti it_proteggere V 5.0
it_articolazione hr_lakat N 0.0
it_vino hr_grožđe N 0.75
hr_jezik it_gola N 0.0
hr_melodija it_motivo N 3.25
it_granchio hr_plodovi_mora N 5.5
it_pagamento hr_stanarina N 0.0
it_materasso hr_zbrajanje N 0.0
it_bistecca hr_hrana N 5.63
hr_prijatelj it_nemico N 0.0
it_antenato hr_roditelj N 1.5
it_apertura hr_ulaz N 2.38
hr_proizvod it_porto N 0.0
hr_mungos it_animale N 5.88
it_cibo hr_pita N 0.0
hr_pogledati it_guardare V 5.88
hr_tegliti it_raccontare V 0.13
hr_kemija it_coltello N 0.0
it_verdura hr_špinat N 0.0
hr_sudbina it_marinaio N 0.0
hr_oružje it_pugnale N 0.0
it_avversario hr_suparnik N 5.75
hr_promijeniti it_persuadere V 0.25
hr_pečenica it_carne N 5.88
it_negare hr_odbaciti V 3.88
it_retro hr_naprijed N 0.0
it_salmone hr_riba N 6.0
it_sega hr_alat N 5.5
it_animale hr_poruka N 0.0
it_tramonto hr_izlazak N 0.0
hr_guska it_animale N 6.0
it_cono hr_oblik N 5.88
it_gettare hr_pokazati V 0.0
it_brezza hr_vjetar N 5.75
it_quoziente hr_iznos N 4.0
hr_mandarina it_nucleo N 0.0
it_hockey hr_sport N 6.0
hr_gusak it_biologia N 0.13
it_piede hr_inč N 0.0
hr_kralj it_sovrano N 5.63
it_larghezza hr_visina N 0.0
hr_dizajner it_creatore N 4.88
it_contenitore hr_boca N 0.25
hr_tuljan it_mammifero N 5.88
it_professionista hr_amater N 0.0
hr_knjiga it_atlante N 0.13
hr_roditelj it_relazione N 3.25
it_fiore hr_orhideja N 0.0
hr_ormar it_stanza N 0.0
it_calcolare hr_računati V 5.5
it_criticare hr_napomenuti V 3.13
it_cantante hr_dokaz N 0.0
it_contadino hr_radnik N 5.88
it_fortuna hr_obilje N 4.75
it_tristezza hr_radost N 0.0
hr_konferencija it_incontro N 5.0
it_competenza hr_sposobnost N 4.88
hr_uređaj it_forno N 0.0
hr_iskrenost it_onesta' N 4.5
hr_mač it_arma N 6.0
hr_koža it_capelli N 0.0
it_suolo hr_zemlja N 2.63
it_segreta hr_dvorac N 0.38
it_sirena hr_signal N 5.63
it_nascondere hr_razviti V 0.0
hr_vrč it_contenitore N 5.75
hr_igračka it_bambola N 0.0
it_educare hr_informirati V 4.0
it_zucchine hr_hrana N 5.75
hr_govor it_lezione N 3.13
hr_vozilo it_motociclo N 0.0
it_inizio hr_kraj N 0.0
hr_izgraditi it_creare V 5.38
it_cemento hr_kamen N 0.88
hr_instrument it_pianoforte N 0.0
it_uovo hr_mlijeko N 0.0
it_odiare hr_odraziti V 0.0
it_mezzo_di_comunicazione hr_televizija N 0.0
it_lanciare hr_živcirati V 0.5
it_spostare hr_istovariti V 0.0
hr_priznati it_acquistare V 0.0
hr_biskup it_re N 0.25
it_orchidea hr_cvijet N 6.0
hr_potok it_tratto N 1.25
it_conclusione hr_početak N 0.13
hr_naslonjač it_sedia N 5.0
it_satana hr_bog N 1.0
hr_uvrijediti it_ferire V 4.63
it_apparecchio hr_kralježnica N 0.0
hr_gaćice it_biancheria_intima N 6.0
it_vicolo hr_ulica N 5.63
hr_prsluk it_camicia N 0.13
it_permettere hr_prikačiti V 0.0
it_dinosauro hr_stvorenje N 6.0
it_dettaglio hr_poanta N 0.75
hr_pokret it_azione N 5.5
it_cibo hr_ječam N 0.0
it_oritteropo hr_životinja N 5.75
it_persona hr_blagajnik N 0.0
it_negare hr_zdrobiti V 0.13
hr_škola it_istruzione N 4.38
it_gioielli hr_naušnica N 0.0
hr_tresti_se it_tremare V 3.38
it_venire hr_napustiti V 0.63
it_secchio hr_spremnik N 5.63
it_spalla hr_lakat N 0.0
hr_jetra it_cuore N 0.0
it_verruca hr_madež N 1.13
hr_džoker it_carta N 6.0
it_conversazione hr_komunikacija N 6.0
hr_pozadina it_parte_anteriore N 0.0
hr_izračunati it_calcolare V 5.5
it_lupo hr_životinja N 6.0
hr_odbor it_gruppo N 5.63
hr_sir it_burro N 0.0
hr_umjetnik it_creatore N 5.38
hr_granit it_pietra N 5.75
hr_čovjekoliki_majmun it_mammifero N 6.0
it_piolo hr_ljestve N 1.63
it_riconoscere hr_zanemariti V 0.0
hr_stvorenje it_lupo N 0.0
hr_mišljenje it_pensiero N 4.63
it_costruire hr_napraviti V 5.5
hr_narukvica it_collana N 0.63
it_lucertola hr_stvorenje N 6.0
hr_zarez it_punteggiatura N 6.0
it_cavolfiore hr_hrana N 5.88
hr_srp it_strumento N 5.63
hr_broj it_otto N 0.0
it_ragazza hr_osoba N 6.0
it_prosciutto hr_hrana N 5.75
hr_vino it_uva N 0.75
it_ammettere hr_kupiti V 0.0
it_presente hr_budućnost N 0.5
it_roccia hr_stijena N 4.25
it_tessuto hr_obrok N 0.0
it_ozono hr_atmosfera N 1.38
it_cassetto hr_stol N 0.0
it_pesce hr_ventil N 0.0
hr_tamjan it_odore N 5.38
hr_odbojka it_gioco N 5.63
it_sintomo hr_orhideja N 0.0
hr_bratstvo it_club N 5.38
it_eruttare hr_eksplodirati V 4.25
it_pulire hr_trljati V 2.63
hr_zglob it_braccio N 0.0
hr_dagnja it_frutti_di_mare N 5.88
hr_omlet it_cibo N 5.75
hr_dijamant it_perla N 0.38
it_zucca hr_hrana N 5.63
it_apparecchio hr_pećnica N 0.0
hr_zdjela it_piatto N 1.25
it_lavorare_a_maglia hr_tkati V 3.13
it_giornale hr_medij N 5.88
hr_konobarica it_lavoratore N 5.88
hr_obrva it_viso N 0.0
it_oliva hr_hrana N 5.75
hr_tikva it_cibo N 5.63
it_dipinto hr_perilica N 0.0
it_limousine hr_glavobolja N 0.0
hr_sjever it_sud N 0.0
it_prestigio hr_status N 3.63
hr_jagoda it_frutta N 6.0
hr_raj it_inferno N 0.0
it_osservare hr_preplanuti V 0.0
hr_peta it_coscia N 0.0
it_macchina_da_scrivere hr_stroj N 6.0
hr_profesionalac it_esperto N 4.5
it_cattedrale hr_ozljeda N 0.0
it_sentiero hr_leopard N 0.0
hr_kovčeg it_bagaglio N 5.88
it_rivista hr_publikacija N 5.5
it_dimora hr_dom N 3.63
hr_klavir it_strumento N 6.0
hr_školjka it_frutti_di_mare N 6.0
hr_zelena it_blu N 0.13
it_centesimo hr_novčić N 5.88
hr_zalazak it_alba N 0.0
it_trincea hr_jarak N 5.38
hr_prositi it_sorseggiare V 0.0
hr_svila it_tessuto N 5.88
hr_postupak it_lacrima N 0.0
hr_spasiti it_schiantarsi V 0.0
hr_kazna it_ricompensa N 0.25
it_virgola hr_interpunkcija N 6.0
it_prendere hr_ščepati V 1.5
it_analisi hr_matematika N 5.63
it_foca hr_sisavac N 5.88
hr_dužnost it_compito N 2.75
hr_razgovor it_discutere V 0.5
it_pesca hr_kruška N 0.0
hr_tkivo it_pelle N 0.0
it_tacco hr_bedro N 0.0
it_limone hr_agrum N 6.0
it_seta hr_tkanina N 5.88
hr_refren it_canzone N 0.13
hr_orhideja it_pianta N 6.0
hr_zavoj it_strada N 1.5
it_uva hr_hrana N 5.63
hr_rukavica_s_palcem it_guanto N 6.0
it_piccolo_ristorante hr_restoran N 5.63
it_materiale hr_guma N 0.0
hr_stolar it_lavoratore N 5.88
it_trombone hr_instrument N 6.0
it_cerniera hr_vrata N 0.0
it_filosofia hr_područje N 5.63
it_saldo hr_račun N 3.0
hr_prasak it_rumore N 5.63
it_castoro hr_životinja N 6.0
it_vitello hr_hrana N 5.63
hr_ljiljan it_pianta N 5.88
it_biscotto hr_hrana N 5.94
hr_riža it_cibo N 5.88
it_capasanta hr_hrana N 5.25
it_frittata hr_hrana N 5.75
hr_kemija it_scienza N 5.88
it_malvivente hr_banda N 0.13
hr_zafrkavati it_infastidire V 4.25
it_atlante hr_enciklopedija N 2.88
hr_opisati it_spiegare V 4.38
it_fare_una_pausa hr_odmoriti V 5.38
it_eseguire hr_razgovarati V 0.25
hr_vile it_strumento N 5.63
it_chiarire hr_objasniti V 5.25
hr_stručnost it_abilita' N 4.88
it_zaffiro hr_dragulj N 5.88
it_brodo hr_juha N 5.75
hr_cent it_dollaro N 0.88
hr_sigurnost it_pericolo N 0.13
it_negozio hr_dućan N 5.88
hr_djevojka it_donna N 5.5
hr_prljavština it_sporco N 5.75
hr_ceremonija it_laurea N 0.0
it_zoppicare hr_hodati V 4.88
hr_top it_pistola N 0.38
it_mascara hr_ruž N 0.0
hr_piće it_birra N 0.0
hr_projekt it_elemento N 0.0
hr_buba it_insetto N 6.0
hr_sisavac it_gatto N 0.0
it_rinunciare hr_tresti V 0.0
hr_insekt it_zanzara N 0.0
hr_žudjeti it_desiderare V 5.38
hr_kredit it_mora N 0.38
hr_bolest it_salute N 0.31
hr_tetka it_pianeta N 0.0
hr_tresti it_affondare V 0.0
hr_nož it_pugnale N 0.75
it_rosa hr_ljubičasta N 0.5
hr_detalj it_punto N 0.75
hr_preurediti it_organizzare V 3.88
it_deteriorare hr_zaboraviti V 0.13
it_proboscide hr_slon N 0.0
hr_čekati it_sequestrare V 0.0
hr_usna it_lingua N 0.0
it_lanciatore hr_hvatač N 0.13
hr_pravokutnik it_forma N 6.0
hr_talent it_capacita' N 5.38
it_animale hr_sisavac N 0.13
it_violino hr_violina N 6.0
hr_cilj it_scalpello N 0.0
hr_neprijatelj it_amico N 0.13
it_bevanda_frizzante hr_tekućina N 5.63
it_carta hr_materijal N 5.75
it_pelle hr_materijal N 5.38
it_immagine hr_televizija N 0.0
hr_integrirati it_mescolare V 2.5
it_veicolo hr_automobil N 0.0
it_ritardo hr_žuriti V 0.0
it_comandante hr_vođa N 5.38
it_apparecchio hr_perilica N 0.0
it_biologia hr_znanost N 6.0
hr_časnik it_polizia N 0.5
it_raggiungere hr_povećati V 0.0
hr_leđa it_spalla N 0.0
hr_podijeliti it_ottenere V 0.13
it_debolezza hr_snaga N 0.0
it_pinna hr_riba N 0.0
it_ombrello hr_zaštita N 5.5
hr_bijes it_rabbia N 5.25
hr_prikupiti it_fare_girare V 0.0
hr_prihvatiti it_negare V 0.0
it_unghia_del_piede hr_prst N 0.0
hr_javor it_albero N 6.0
hr_prag it_bordo N 3.63
it_caffeina hr_kava N 0.0
hr_životinja it_elefante N 0.0
hr_ceremonija it_lama N 0.0
hr_rana it_ferita N 5.5
hr_sumrak it_sera N 3.31
it_pasto hr_večera N 0.0
hr_jesen it_stagione N 6.0
it_lupo hr_stvorenje N 5.63
hr_miš it_animale N 6.0
hr_semestar it_ora N 0.0
it_jet hr_avion N 6.0
it_secchio hr_bačva N 1.13
hr_kost it_mascella N 0.0
hr_rubnik it_lato N 1.5
hr_vježba it_attivita' N 5.38
hr_drvo it_pianta N 5.0
hr_operacija it_spirito N 0.0
it_dovere hr_zadatak N 2.75
it_oca hr_ptica N 5.63
hr_sport it_ascia N 0.0
it_giglio hr_biljka N 5.88
it_fidanzato hr_djevojka N 0.0
it_mandarino hr_voće N 6.13
hr_borovnica it_bacca N 6.0
it_incontro hr_konferencija N 0.13
hr_blato it_religione N 0.0
it_sopracciglio hr_lice N 0.0
it_topo hr_životinja N 6.0
it_gatto hr_sisavac N 6.0
it_gamba hr_koljeno N 0.0
it_osservare hr_gledati V 6.0
it_parlare hr_kucati V 0.0
it_lavoratore hr_farmer N 0.0
hr_lopata it_secchio N 0.0
hr_trombon it_strumento N 6.0
hr_salata it_cibo N 5.63
it_alcol hr_supstanca N 5.5
it_formica hr_insekt N 6.0
hr_razlikovati_se it_concordare V 0.0
it_fusto hr_spremnik N 4.75
it_pavimento hr_tlo N 3.5
hr_gurnuti it_muoversi V 5.5
it_moglie hr_umjetnost N 0.25
hr_naslov it_tecnica N 0.5
hr_poraziti it_rinunciare V 0.0
it_prendere hr_oteti V 1.25
hr_hrast it_collana N 0.0
it_punta hr_olovka N 0.25
it_barriera hr_zid N 1.25
it_annuncio_pubblicitario hr_oglas N 5.5
hr_paket it_busta N 0.75
hr_supružnik it_matrimonio N 0.0
it_cibo hr_kobasica N 0.0
hr_predložiti it_dire V 4.63
it_scadenza hr_razdoblje N 3.75
hr_karavan it_veicolo N 6.0
hr_osloviti it_stare_in_piedi V 0.0
it_pallacanestro hr_aktivnost N 5.63
it_appoggiare hr_položiti V 3.88
it_misura hr_galon N 0.0
hr_madrac it_aggiunta N 0.0
it_animale hr_zvijer N 1.75
it_lucertola hr_životinja N 6.0
hr_limun it_frutta N 6.0
hr_dinosaur it_creatura N 6.0
it_sollecitare hr_reći V 2.38
it_autunno hr_period N 6.0
hr_kraljica it_doccia N 0.0
hr_kriviti it_bere V 0.0
hr_smrt it_fine N 4.63
it_bicchiere hr_šalica N 1.0
hr_svjetiljka it_tavolo N 0.0
hr_morski_pas it_pesce N 5.75
hr_posada it_gruppo N 4.88
hr_žena it_marito N 0.0
hr_zahod it_bagno N 2.25
it_salire hr_pasti V 0.0
it_ragazza hr_žena N 5.5
hr_neslaganje it_conflitto N 4.75
hr_štednjak it_pavimento N 0.0
hr_razdvojiti it_distaccare V 5.25
it_partire hr_kontrolirati V 0.13
hr_smeđa it_verde N 0.0
it_pensiero hr_vjerovanje N 1.25
it_ascendere hr_napustiti V 0.0
it_figlio hr_kćer N 0.0
hr_kaciga it_tasca N 0.0
it_prestazione hr_sjedalo N 0.0
hr_odvojiti it_separare V 5.38
hr_dlaka it_mammifero N 0.0
hr_stanarina it_pagamento N 4.25
it_ragione hr_uzrok N 3.5
hr_zdrobiti it_demolire V 4.38
it_ascia hr_alat N 5.88
hr_voziti it_camminare V 0.25
hr_grliti it_tenere V 3.13
it_lavoratore hr_konobarica N 0.0
it_uva hr_ekstremitet N 0.0
hr_hobotnica it_creatura N 6.0
hr_vlasnik it_persona N 5.88
hr_kupina it_cibo N 5.5
it_crepuscolo hr_večer N 3.31
it_gatto hr_životinja N 6.0
hr_rijeka it_signore N 0.0
it_assone hr_neuron N 0.0
hr_radnik it_meccanico N 0.0
it_nomade hr_osoba N 5.63
it_raggiungere hr_izgraditi V 0.0
hr_radnik it_muratore N 0.0
it_seppellire hr_pokriti V 4.13
it_sedia hr_klupa N 0.5
hr_kapak it_occhio N 0.0
it_morte hr_kraj N 4.63
hr_ekstaza it_sentimento N 5.63
it_acqua hr_tvar N 5.63
it_fragola hr_hrana N 5.5
it_avversario hr_refren N 0.0
hr_dama it_castello N 0.0
hr_nadnica it_salario N 5.0
hr_liječnik it_chirurgo N 0.5
hr_kupus it_cibo N 5.69
hr_kip it_arte N 4.38
hr_krađa it_crimine N 5.88
hr_losos it_pesce N 6.0
hr_hokej it_sport N 6.0
it_mezzogiorno hr_dan N 0.75
it_proprietario hr_osoba N 5.88
hr_pjega it_macchia N 4.88
hr_radnik it_tecnico N 0.0
it_quaglia hr_životinja N 5.88
hr_migrena it_dolore N 4.88
it_monumento hr_memorijal N 4.0
hr_grožđe it_estremita' N 0.0
it_dare_da_mangiare hr_gladovati V 0.0
it_obbiettivo hr_dlijeto N 0.0
it_pensare hr_sumnjati V 0.25
it_accusare hr_piti V 0.0
hr_uređaj it_colonna_vertebrale N 0.0
it_geologia hr_područje N 5.13
it_profitto hr_gubitak N 0.0
it_branzino hr_riba N 6.0
it_labbro hr_usta N 0.0
it_lavoratore hr_zidar N 0.0
hr_uskratiti it_rifiutare V 3.5
hr_kisik it_acqua N 0.0
hr_tamnica it_castello N 0.38
hr_auto it_auto N 6.0
hr_plodovi_mora it_cozza N 0.0
hr_radost it_tristezza N 0.0
hr_rukovoditelj it_capo N 4.75
hr_tornado it_tempesta N 5.5
it_sincerita' hr_poštenje N 4.5
hr_kaput it_camino N 0.0
it_macellaio hr_pekar N 0.0
hr_jaje it_latte N 0.0
it_contratto hr_dokument N 6.0
hr_prijelaz it_strada N 2.13
it_rame hr_bronca N 0.38
it_penna_d'oca hr_dikobraz N 0.0
hr_instrument it_chitarra N 0.0
it_cervello hr_pokret N 0.0
it_strumento hr_gitara N 0.0
it_unire hr_podijeliti V 0.0
hr_umjetnost it_scultura N 0.0
it_ombra hr_svjetlo N 1.0
hr_peta it_stivale N 0.0
it_ciambella hr_hrana N 5.88
it_re hr_vladar N 5.63
hr_žumanjak it_uovo N 0.0
hr_košarka it_attivita' N 5.63
it_liberta' hr_sloboda N 5.63
hr_dagnja it_capasanta N 0.0
it_strofinare hr_uloviti V 0.0
it_seta hr_materijal N 6.0
hr_nastaviti it_rompere V 0.0
hr_odbiti it_accettare V 0.0
hr_katastrofa it_tragedia N 3.75
hr_uzeti it_agguantare V 1.5
hr_štap it_gambo N 0.0
hr_lik it_personalita' N 2.88
it_atleta hr_sportaš N 6.0
it_flauto hr_instrument N 6.0
hr_piće it_bevanda_frizzante N 0.0
it_medicazione hr_saksofon N 0.0
hr_progutati it_ingoiare V 5.5
hr_novine it_ufficiale N 0.38
it_senso hr_besmislica N 0.0
hr_kišobran it_protezione N 5.5
hr_gledati it_strabuzzare_gli_occhi V 0.0
it_tenere hr_zagrliti V 0.0
hr_teletina it_carne N 6.0
it_impiegato hr_račun N 0.0
hr_domaći it_incarico N 4.75
hr_sastanak it_conferenza N 0.13
it_pugnale hr_oružje N 5.88
hr_neboder it_edificio N 6.0
hr_grgeč it_pesce N 6.0
hr_slika it_arte N 5.5
it_gin hr_piće N 6.0
it_limite hr_granica N 4.5
it_deglutire hr_gutati V 5.5
hr_žlica it_forchetta N 0.0
hr_vatreno_oružje it_fucile N 0.38
it_buio hr_flanel N 0.0
it_club hr_organizacija N 5.25
it_fare_una_pausa hr_trčanje V 0.0
it_parlare hr_debata V 0.5
hr_riba it_valvola N 0.0
it_cigno hr_životinja N 6.0
hr_odreći_se it_scuotere V 0.0
hr_zora it_tramonto N 0.38
it_zanzara hr_mudrost N 0.0
it_prosciutto hr_meso N 6.0
it_fronte hr_lice N 0.0
it_raccontare hr_predložiti V 0.25
it_torta hr_hrana N 5.75
hr_tegliti it_tirare V 4.75
hr_stablo it_foresta N 0.13
it_punto hr_igla N 0.0
it_gabbiano hr_ptica N 6.0
hr_hrana it_torta N 0.0
hr_baciti it_mostrare V 0.0
it_inverno hr_ljeto N 0.0
it_zanzara hr_insekt N 6.0
hr_stog it_mucchio N 4.5
it_ala hr_koža N 0.0
hr_razlog it_intelletto N 0.0
hr_životinja it_bestia N 1.75
it_azoto hr_kisik N 0.0
it_gorilla hr_majmun N 6.0
it_dilettante hr_posjed N 0.0
hr_gljiva it_gentilezza N 0.0
hr_pingvin it_uccello N 5.13
it_fine hr_kraj N 5.88
it_piatto hr_žlica N 0.0
hr_podatak it_informazione N 5.38
hr_knjiga it_enciclopedia N 0.0
it_geologia hr_znanost N 6.0
hr_pšenica it_cereale N 5.88
it_bersagliare hr_bacati V 2.75
it_insalata_di_cavolo hr_hrana N 5.75
it_carne hr_čovjek N 0.0
hr_hamburger it_uccello N 0.0
hr_lizalica it_caramella N 5.63
it_credito hr_kupina N 0.38
hr_tableta it_pillola N 5.13
it_acido hr_ljuska N 0.0
hr_pod it_terra N 3.5
hr_četiri it_due N 0.0
it_cozza hr_mornar N 0.0
hr_društvo it_gruppo N 5.0
it_letto hr_spavaonica N 0.13
hr_celer it_cibo N 5.75
hr_oklop it_attico N 0.0
hr_pištolj it_pistola N 6.0
hr_dlijeto it_strumento N 6.0
hr_zapreka it_impedimento N 5.5
hr_svojstvo it_viso N 0.0
it_supporre hr_nagađati V 5.5
hr_emocija it_sentimento N 4.88
hr_čekati it_esitare V 1.5
it_furto hr_kriminal N 5.88
it_unghia hr_prst N 0.0
it_violino hr_instrument N 6.0
it_aggettivo hr_glagol N 0.0
it_ruscello hr_tok N 5.5
it_arcobaleno hr_nebo N 0.38
hr_želja it_attaccare V 0.0
it_Saturno hr_planet N 6.0
it_donna hr_heroina N 0.38
it_materasso hr_krevet N 1.5
hr_dojam it_viale N 0.0
it_raccogliere hr_zavrtiti V 0.0
it_zanna hr_dužnost N 0.0
hr_poklopac it_telecamera N 0.0
it_caveau hr_banka N 0.13
it_animale hr_štakor N 0.0
hr_guverner it_politico N 5.88
hr_guma it_materiale N 6.0
it_soffocare hr_ubiti V 5.5
it_sud hr_sjever N 0.0
hr_vući it_trainare V 3.0
it_mensola hr_ormar N 0.88
hr_protuotrov it_cura N 5.63
hr_astronomija it_scienza N 5.88
it_fango hr_religija N 0.0
it_strada hr_škamp N 0.0
it_professore hr_fakultet N 0.0
it_vista hr_vizija N 1.5
it_disordine hr_red N 0.25
it_sport hr_sjekira N 0.0
hr_noga it_ginocchio N 0.0
it_ricevere hr_dobiti V 4.13
hr_zrakoplov it_cannone N 0.0
hr_miš it_roditore N 6.0
it_dilettante hr_stručnjak N 0.38
hr_poruka it_nota N 3.13
hr_prhut it_fiocco N 1.75
hr_sreća it_emozione N 6.0
it_pila hr_gomila N 4.5
it_ponte hr_brod N 0.0
hr_sumnjati it_pensare V 4.5
it_cavolfiore hr_brokula N 0.25
hr_postaviti it_dondolare V 0.0
it_profumo hr_dezodorans N 0.13
it_guanto hr_rukavica_s_palcem N 0.25
hr_lisica it_animale N 6.0
hr_grožđica it_frutta N 5.38
hr_zmija it_rettile N 5.88
it_signore hr_dama N 0.0
it_crepuscolo hr_bogatstvo N 0.0
hr_kobasica it_cibo N 6.0
hr_kamen it_masso N 4.25
hr_točka it_ago N 0.0
it_uragano hr_oluja N 5.13
it_chiedere hr_moliti V 0.5
hr_izvoditi it_parlare V 0.25
hr_kretati it_ondeggiare V 0.0
it_periodo hr_pubertet N 0.0
hr_obrazovati it_insegnare V 4.25
it_fratello hr_sestra N 0.0
it_insetto hr_komarac N 0.0
hr_pogledati it_allungare V 0.0
hr_zbroj it_totale N 4.25
hr_porcija it_quantita' N 5.38
hr_tekućina it_acqua N 0.13
hr_kit it_cricket N 0.0
hr_kamen it_roccia N 3.0
hr_priznati it_accettare V 3.25
it_gruppo hr_legija N 0.0
hr_mlijeko it_liquido N 5.88
it_accordo hr_klupa N 0.0
hr_vrlina it_paesaggio N 0.0
hr_štakor it_animale N 6.0
hr_leš it_corpo N 5.75
hr_odred it_gruppo N 5.75
hr_ubiti it_soffocare V 0.0
hr_matematika it_scienza N 6.0
it_padre hr_violina N 0.0
hr_čin it_dramma N 0.0
it_fare hr_biti V 0.63
hr_vrpca it_linea N 3.0
it_dito_del_piede hr_stopalo N 0.0
hr_violina it_violino N 6.0
it_parlare hr_komunicirati V 5.88
hr_kriket it_sport N 6.0
it_influenza hr_bolest N 5.75
hr_stetoskop it_strumento N 6.0
it_carattere hr_osoba N 2.88
it_coltello hr_bodež N 0.75
it_minatore hr_radnik N 6.0
it_dividere hr_razderati V 0.5
it_fuoco hr_voda N 0.0
it_coccodrillo hr_životinja N 6.0
hr_formula it_panettiere N 0.0
hr_noga it_coscia N 0.38
hr_školjka it_cozza N 0.0
hr_razbiti it_distruggere V 5.75
it_anello hr_nakit N 6.0
hr_potok it_acqua N 4.88
it_smoking hr_odjelo N 5.88
it_oca hr_životinja N 6.0
hr_torbica it_borsa N 5.63
hr_branik it_auto N 0.0
hr_korov it_pianta N 5.5
it_annunciare hr_reći V 5.0
hr_pridjev it_parola N 6.0
it_chiedere hr_podsjetiti V 0.38
it_clacson hr_automobil N 0.0
hr_lav it_tigre N 0.0
it_cavallo hr_sisavac N 6.0
it_credenza hr_praznovjerje N 1.38
hr_slon it_ufficiale N 0.0
hr_potok it_corso_d'acqua N 5.5
hr_jogurt it_cibo N 5.88
hr_zgrada it_cattedrale N 0.0
it_comunicazione hr_jezik N 0.38
hr_prihvatiti it_ristabilire V 0.25
it_uomo hr_žena N 0.0
hr_promatrati it_guardare V 6.0
it_pranzo hr_doručak N 0.13
hr_oružje it_spada N 0.0
hr_hokej it_frase N 0.0
it_separare hr_odvojiti V 5.25
it_universo hr_svijet N 0.38
it_yogurt hr_hrana N 5.88
it_attraversamento hr_kornjača N 0.0
hr_gmaz it_alligatore N 0.0
hr_pukovnik it_ufficiale N 4.38
hr_stotina it_quantita' N 5.13
it_creatura hr_vuk N 0.0
hr_kanta it_contenitore N 5.63
hr_špijun it_agente N 5.25
it_catena hr_bicikl N 0.0
it_puzzola hr_životinja N 5.88
hr_alat it_pala N 0.0
it_moglie hr_muž N 0.0
hr_voće it_ciliegia N 0.0
it_calcio hr_sport N 6.0
hr_bogatstvo it_ricchezza N 4.75
hr_osporiti it_rifiutare V 3.88
hr_sok it_latte N 0.0
it_psicologia hr_znanost N 5.63
it_zia hr_planet N 0.0
hr_kanarinac it_uccello N 6.0
hr_bajka it_storia N 5.75
hr_želudac it_addome N 0.5
hr_službenik it_persona N 5.88
hr_primjer it_esempio N 5.63
it_tragedia hr_komedija N 0.5
it_pianta hr_cvijet N 0.0
it_racquetball hr_sport N 6.0
hr_osoba it_lettore N 0.88
hr_razjasniti it_spiegare V 5.25
hr_kajanje it_tristezza N 1.75
hr_orangutan it_primate N 6.0
hr_skvoš it_sport N 6.0
it_film hr_sunce N 0.0
it_virtu' hr_kvaliteta N 5.0
hr_ogrtač it_mantello N 3.13
it_organo hr_bubreg N 0.0
hr_hrast it_pino N 0.0
hr_baciti it_fare_una_pausa V 0.0
hr_amater it_esperto N 0.38
hr_skupina it_legione N 0.0
it_animale hr_gmaz N 0.13
hr_značenje it_assurdita' N 0.0
hr_uragan it_tempesta N 5.13
hr_fotelja it_mobilio N 6.0
hr_časnik it_caporale N 0.38
it_gamba hr_bedro N 0.38
hr_prijelaz it_tartaruga N 0.0
hr_prisjetiti_se it_chiedere V 0.0
hr_slabost it_forza N 0.0
it_polizia hr_vlast N 3.75
it_sonetto hr_pjesma N 6.0
it_fiore hr_prekršaj N 0.0
hr_bol it_sintomo N 5.25
hr_praznovjerje it_credenza N 5.38
it_coltello hr_mač N 1.0
it_negare hr_potisnuti V 2.63
it_sabbia hr_plaža N 0.75
it_parlare hr_savjetovati V 0.0
hr_spremnik it_thermos N 0.25
hr_dijete it_famiglia N 1.88
hr_promjer it_lunghezza N 5.0
it_guadagnare hr_prasnuti V 0.0
it_unita' hr_skupina N 2.25
hr_kuhinja it_camera_da_letto N 0.0
it_strumento hr_odvijač N 0.0
hr_prilog it_parola N 5.63
it_splendere hr_blistati V 4.63
hr_usta it_viso N 0.0
hr_sumrak it_ricchezza N 0.0
it_ritirarsi hr_sići V 1.75
hr_organ it_rene N 0.0
it_sardina hr_hrana N 5.5
it_dolore hr_simptom N 5.25
hr_komunikacija it_linguaggio N 0.38
hr_lakat it_braccio N 0.13
hr_obrazovanje it_impero N 0.0
hr_povući_se it_discendere V 1.75
hr_galon it_pinta N 0.0
it_gamberetto hr_jastog N 0.25
hr_stolica it_panchina N 0.5
it_inverno hr_period N 5.88
hr_suprug it_serpente N 0.0
hr_dopustiti it_allegare V 0.0
hr_protivnik it_avversario N 5.75
it_squash hr_igra N 5.75
it_bevanda hr_pivo N 0.0
it_fissare hr_pričvrstiti V 0.75
hr_podijeliti it_aggiungere V 0.13
hr_oblik it_sfera N 0.13
it_cannone hr_pištolj N 0.38
hr_znanje it_lungimiranza N 0.25
hr_osoba it_persona_che_parla N 0.25
hr_koncert it_evento N 5.88
it_prendere_in_prestito hr_gnjaviti V 0.0
hr_dimnjak it_cigno N 0.0
it_polpo hr_stvorenje N 6.0
hr_psihologija it_scienza N 5.63
it_camionetta hr_vozilo N 6.0
it_sport hr_aktivnost N 5.88
hr_neprijatelj it_avversario N 4.38
hr_bolest it_malattia N 5.88
hr_jagoda it_mirtillo N 0.0
hr_tama it_luce N 0.38
hr_mjera it_gallone N 0.0
hr_vrana it_uccello N 6.0
it_colpevolezza hr_nevinost N 0.0
it_ragione hr_intelekt N 0.0
it_coraggio hr_hrabrost N 5.5
it_scienza hr_anatomija N 0.0
it_vicolo hr_put N 4.75
it_crepuscolo hr_sumrak N 5.63
it_rana hr_životinja N 6.0
hr_papir it_materiale N 5.75
hr_mehaničar it_lavoratore N 6.0
it_suolo hr_pljusak N 0.0
it_ridere hr_plakati V 0.0
hr_gmaz it_animale N 6.0
it_gruppo hr_banda N 0.5
it_relazione hr_odnos N 6.0
it_costruire hr_stvoriti V 5.38
it_settimana hr_mjesec N 0.0
it_boccia hr_kuglanje N 0.0
it_curva hr_praznovjerje N 0.0
it_nota hr_poruka N 5.0
it_scuotere hr_tonuti V 0.0
it_pettirosso hr_ptica N 6.0
it_pagliaio hr_pobjednik N 0.0
hr_prskati it_versare V 1.63
hr_nadvladati it_superare V 4.88
it_rimedio hr_uzrok N 0.0
it_zanna hr_slon N 0.0
it_strumento hr_skalpel N 0.0
it_fluido hr_tipkovnica N 0.0
hr_dvanaest it_numero N 6.0
hr_odjel it_organizzazione N 2.88
it_segreta hr_ćelija N 3.75
it_somma hr_iznos N 4.25
hr_naučiti it_giudicare V 0.13
hr_stuba it_scalinata N 0.13
hr_zagrliti it_tenere V 3.38
it_lingua hr_grlo N 0.0
hr_večera it_cibo N 3.75
it_istruzione hr_carstvo N 0.0
hr_mačka it_aspetto N 0.13
hr_pomaknuti it_rimanere V 0.0
hr_ručak it_cibo N 3.0
hr_mravojed it_animale N 5.81
it_colpire hr_trčati V 0.0
it_acqua hr_led N 0.13
it_reminiscenza hr_sjećanje N 5.5
hr_večera it_cassetto N 0.0
it_mirtillo hr_bobica N 6.0
hr_nakit it_orecchino N 0.0
hr_posuditi it_infastidire V 0.0
hr_rima it_cena N 0.0
it_ansia hr_osjećaj N 6.0
it_mucca hr_životinja N 6.0
hr_otac it_antenato N 5.25
hr_tvor it_animale N 5.88
hr_kljova it_dovere N 0.0
hr_kršćanin it_chiesa N 0.5
hr_pogreb it_cerimonia N 5.5
hr_gangster it_banda N 0.13
it_ostacolare hr_zadržati V 1.88
hr_škiljiti it_guardare V 5.38
hr_zdjela it_bowling N 0.0
hr_sluh it_vista N 0.0
it_cristiano hr_crkva N 0.5
it_prisma hr_oblik N 6.0
it_societa' hr_skupina N 5.0
it_orchidea hr_biljka N 6.0
it_scimmia hr_sisavac N 6.0
it_cavita' hr_zub N 0.0
it_ingoiare hr_upropastiti V 0.25
hr_cigareta it_sigaro N 2.13
it_tacco hr_čizma N 0.0
hr_predak it_padre N 0.13
hr_rog it_cervo N 0.0
hr_ovratnik it_collo N 0.0
hr_maturalna it_festa N 5.88
it_scimmia hr_primat N 6.0
it_cavolo hr_povrće N 6.0
it_caffe' hr_mlijeko N 0.0
hr_misa it_cerimonia N 4.75
it_dare_una_pacca hr_dodirnuti V 5.13
hr_rog it_toro N 0.0
hr_košarka it_sport N 6.0
it_destino hr_haljina N 0.0
it_arancia hr_voće N 6.0
hr_ideja it_suggerimento N 1.75
it_calibro hr_nogostup N 0.0
it_strumento hr_klavir N 0.0
hr_analizirati it_sprecare V 0.0
it_fratello hr_rod N 4.75
it_capo hr_stopalo N 0.0
it_incolpare hr_optužiti V 5.25
hr_limeta it_frutta N 5.88
hr_aritmetika it_matematica N 5.56
hr_boca it_contenitore N 5.63
hr_profesionalac it_professore N 0.25
it_proteina hr_mlijeko N 0.0
it_chirurgia hr_odmor N 0.0
hr_majmun it_umorismo N 0.0
hr_košulja it_microscopio N 0.0
it_caravan hr_vozilo N 6.0
it_medicina hr_medikament N 6.0
hr_napredovati it_ritirarsi V 0.0
it_baseball hr_sport N 6.0
hr_džip it_veicolo N 6.0
it_motore hr_vlak N 0.0
hr_vuk it_animale N 6.0
hr_oznaka it_cartello N 4.75
it_crema_pasticciera hr_zgrada N 0.0
hr_pila it_strumento N 5.5
hr_osuda it_verdetto N 4.75
it_mora hr_hrana N 5.5
hr_ubojica it_ladro N 0.75
hr_pismo it_scritto N 5.38
hr_spomenik it_memoriale N 4.0
hr_integritet it_lavoratore N 0.0
hr_mrziti it_riflettere V 0.0
hr_klub it_confraternita N 1.5
hr_automobil it_veicolo N 5.5
hr_gutati it_sprecare V 0.25
hr_braniti it_macchiare V 0.0
it_guardare hr_vrednovati V 1.0
it_movimento hr_aktivnost N 5.63
it_muffola hr_rukavica N 6.0
it_riflettere hr_razmišljati V 5.63
it_gioielli hr_prsten N 0.0
it_divano hr_stolica N 2.38
hr_junak it_furfante N 0.0
hr_pamuk it_poliestere N 0.0
it_scienza hr_matematika N 0.0
it_compiti_a_casa hr_zadatak N 4.75
it_vendere hr_potvrditi V 0.25
it_alba hr_dan N 1.63
it_dirigente hr_šef N 4.75
it_elefante hr_časnik N 0.0
it_societa' hr_biznis N 3.75
it_tessuto hr_svila N 0.0
hr_hamburger it_cibo N 6.0
hr_četiri it_numero N 6.0
it_pettegolezzo hr_glasina N 5.88
it_spada hr_oružje N 6.0
hr_skupina it_coro N 0.38
hr_pločnik it_marciapiede N 5.88
it_sentimento hr_ljubomora N 0.0
it_progettare hr_crtati V 1.5
it_costruire hr_uništiti V 0.0
hr_svađa it_conflitto N 5.63
it_annientare hr_ubiti V 1.13
hr_pogreška it_errore N 5.25
hr_eruptirati it_esplodere V 4.25
hr_šljiva it_frutta N 6.0
it_trattore hr_vozilo N 6.0
it_tartaruga hr_životinja N 6.0
it_giocattolo hr_igračka N 6.0
it_disegno hr_skica N 0.0
hr_zec it_sinagoga N 0.0
it_capacita' hr_rukovodstvo N 0.38
it_luce hr_aura N 0.25
hr_uzdići_se it_scalare V 2.13
it_bisturi hr_kanarinac N 0.0
it_medicina hr_tableta N 0.0
it_cassetto hr_komoda N 0.0
it_rubino hr_dragulj N 5.75
hr_nadražiti it_trascorrere V 0.25
hr_sova it_uccello N 6.0
hr_činiti it_essere V 0.63
it_etichetta hr_znak N 4.75
it_pisello hr_hrana N 5.88
hr_piletina it_cibo N 5.75
hr_blistati it_risplendere V 5.38
hr_staklo it_armadietto N 0.0
hr_svinjetina it_carne N 6.0
it_parata hr_marš N 4.25
it_elefante hr_sisavac N 6.0
hr_umak it_sugo N 5.63
it_passaggio hr_skakavac N 0.38
it_fantasma hr_duh N 3.5
hr_purica it_uccello N 5.88
hr_gljiva it_mostro N 0.0
it_blocco hr_prepreka N 4.63
hr_tajfun it_tempesta N 5.25
hr_odvijač it_strumento N 6.0
hr_zid it_dipartimento N 0.25
hr_škamp it_aragosta N 0.25
it_mal_di_testa hr_bol N 6.0
hr_automobil it_limousine N 0.0
it_ferro hr_čelik N 0.0
hr_redovnik it_avversario N 0.0
it_tirare hr_gurnuti V 0.38
it_pinguino hr_ptica N 5.13
it_metallo hr_društvo N 0.13
hr_kralj it_monarca N 5.75
it_impero hr_država N 3.75
hr_strpljenje it_impazienza N 0.0
it_leone hr_tigar N 0.0
it_catena hr_kanta N 0.0
hr_mit it_mitologia N 1.38
hr_riba it_branzino N 0.0
hr_zeko it_coniglio N 6.0
hr_bendžo it_strumento N 6.0
it_sostantivo hr_glagol N 0.0
hr_rukomet it_sport N 6.0
hr_vjera it_religione N 1.38
it_folla hr_skupina N 5.5
it_afferrare hr_držati V 4.0
it_affitto hr_uplata N 4.25
it_linea hr_mast N 0.0
hr_kralježnica it_spina_dorsale N 4.38
hr_sudbina it_fato N 4.88
hr_žena it_anello N 0.0
it_lavoratore hr_tehničar N 0.0
it_scacchi hr_igra N 5.75
hr_atlas it_libro N 5.63
hr_krava it_animale N 6.0
hr_džogirati it_correre V 5.63
it_fegato hr_organ N 6.0
it_gallone hr_pinta N 0.0
hr_zalazak it_sera N 0.75
it_vincitore hr_pobjednik N 5.88
hr_globus it_sfera N 5.13
hr_lijek it_compressa N 0.0
hr_violina it_strumento N 6.0
it_trave hr_potpora N 4.75
it_naso hr_lice N 0.0
hr_jetra it_biologo N 0.0
it_pizza hr_hrana N 6.0
hr_škamp it_frutti_di_mare N 6.0
hr_safir it_gemma N 5.88
it_leopardo hr_tigar N 0.13
hr_ruž it_classe N 0.0
it_sport hr_odbojka N 0.0
hr_tjedan it_mese N 0.0
hr_pitati it_richiamare V 0.38
hr_sendvič it_cibo N 6.0
it_gola hr_vrat N 0.13
it_piramide hr_oblik N 5.88
hr_poručnik it_ufficiale N 3.88
hr_pivo it_alcol N 5.88
it_aiutare hr_dodati V 0.25
it_raccogliere hr_dobiti V 2.75
it_aroma hr_miris N 4.63
it_sposa hr_okupljanje N 0.0
it_aspettare hr_ugrabiti V 0.0
hr_aligator it_rettile N 6.0
hr_jug it_direzione N 6.0
hr_sestra it_comunita'_di_donne N 0.5
hr_obilje it_scarsita' N 0.0
hr_mjerač it_marciapiede N 0.0
hr_toksin it_veleno N 6.0
it_astronomia hr_znanost N 5.88
hr_reakcija it_effetto N 3.63
hr_kada it_bagno N 0.13
hr_životinja it_anatra N 0.0
hr_otkriti it_trovare V 4.5
hr_držati it_abbracciare V 0.0
it_collo hr_potok N 0.0
it_aggiungere hr_oduzeti V 0.13
hr_antilop it_materiale N 5.75
hr_majmun it_animale N 6.0
it_centinaio hr_iznos N 5.13
it_studente hr_učenik N 3.38
hr_metal it_societa' N 0.13
hr_pauzirati it_interrompere V 5.38
hr_tkivo it_organo N 0.25
it_nove hr_broj N 6.0
hr_publikacija it_rivista N 0.13
it_conoscenza hr_predviđanje N 0.25
it_sposare hr_ujediniti V 5.63
hr_sakriti it_sviluppare V 0.0
hr_zahod it_alligatore N 0.0
it_ristabilire hr_pauzirati V 0.0
hr_nadvladati it_sconfiggere V 3.38
hr_pauza it_correre V 0.0
it_fallire hr_operirati V 0.0
it_dimenticare hr_poreći V 0.5
hr_čaša it_tazza N 1.0
hr_slomiti it_schiacciare V 0.75
it_idolo hr_mač N 0.0
hr_koljač it_uccisore N 5.88
it_analisi hr_studija N 4.5
hr_udariti it_mancare V 0.0
it_esercizio hr_aktivnost N 5.38
it_ora hr_život N 0.0
it_distruggere hr_ubiti V 0.13
hr_sova it_animale N 6.0
hr_lijes it_scatola N 5.5
hr_govor it_linguaggio N 1.88
it_programma hr_popis N 3.38
hr_traktor it_veicolo N 6.0
hr_orao it_uccello N 6.0
it_sei hr_broj N 6.0
it_imparare hr_razviti V 4.13
it_rapinatore hr_tama N 0.0
it_missione hr_dužnost N 3.75
hr_krivnja it_sensazione N 6.0
hr_svećenik it_rabbino N 0.0
it_nocca hr_prst N 0.25
hr_pisaći_stroj it_macchina N 6.0
it_festa hr_događaj N 5.63
it_tornado hr_oluja N 5.5
it_fuori hr_unutra N 0.0
hr_paluba it_nave N 0.0
hr_šarka it_cancello N 0.0
it_rene hr_organ N 6.0
it_catastrofe hr_tragedija N 3.75
hr_sisavac it_elefante N 0.0
hr_brava it_porta N 0.25
hr_sljedbenik it_capo N 0.13
it_ratto hr_životinja N 6.0
it_ingrandire hr_povećati V 5.0
hr_tuba it_strumento N 6.0
it_tirare hr_tegliti V 3.13
it_malattia hr_karcinom N 0.0
hr_motocikl it_veicolo N 6.0
hr_uređaj it_microonde N 0.0
hr_medij it_televisione N 0.0
it_capra hr_dijete N 0.0
it_luccio hr_riba N 6.0
it_pony hr_konj N 5.88
it_tennis hr_aktivnost N 5.88
hr_kofein it_problema N 0.38
it_rettangolo hr_oblik N 6.0
hr_saksofon it_trattamento N 0.0
it_sala hr_prolaz N 0.38
it_dispositivo hr_telefon N 0.0
it_principe hr_kapetan N 0.88
it_cucchiaio hr_vilica N 0.0
hr_grah it_cibo N 5.88
it_udito hr_vid N 0.0
hr_traktor it_camion N 0.5
hr_komarac it_insetto N 6.0
it_delfino hr_kisik N 0.0
it_liquido hr_tvar N 5.38
it_fiammata hr_plamen N 5.38
hr_simpatija it_sensazione N 5.5
hr_skalpel it_canarino N 0.0
hr_navigator it_esploratore N 3.25
hr_jazz it_musica N 6.0
hr_oblik it_triangolo N 0.0
hr_štuka it_pesce N 6.0
hr_džin it_liquore N 6.0
it_pecora hr_stado N 0.13
hr_metar it_unita' N 5.88
hr_lutka it_giocattolo N 6.0
it_libro hr_atlas N 0.13
hr_razviti it_fare V 4.25
hr_sudbina it_ruscello N 0.0
hr_blokada it_barriera N 4.63
hr_naušnica it_gioielli N 5.88
it_camino hr_labud N 0.0
hr_automobil it_treno N 0.0
hr_dvorana it_passaggio N 0.38
it_osso hr_čeljust N 0.0
hr_vid it_percezione N 4.5
hr_nos it_viso N 0.0
hr_kviz it_test N 5.38
it_testa hr_tijelo N 0.0
it_bara hr_kovčeg N 5.5
it_puberta' hr_mladost N 4.38
it_ipotesi hr_bazen N 0.0
it_limousine hr_automobil N 5.63
it_scienza hr_disciplina N 4.88
hr_kontrola it_esperimento N 1.13
it_guardare hr_pogledati V 1.0
hr_uništiti it_assaggiare V 0.0
it_sottaceto hr_hrana N 4.88
it_funerale hr_ceremonija N 5.5
it_lentiggine hr_točka N 4.88
hr_cijena it_valore N 4.75
it_otturatore hr_fotoaparat N 0.0
hr_religija it_credenza N 5.63
it_serratura hr_vrata N 0.25
hr_dušik it_ossigeno N 0.0
hr_krevet it_camera_da_letto N 0.13
it_cerniera hr_hlače N 0.0
hr_kanarinac it_piuma N 0.0
it_mito hr_legenda N 3.88
it_serpente hr_slabost N 0.0
it_vetro hr_prozor N 0.63
it_sostantivo hr_riječ N 6.0
it_nemico hr_protivnik N 4.38
it_personale hr_škola N 0.0
hr_pivo it_bevanda N 6.0
it_corso hr_ulica N 5.38
it_paura hr_tenor N 0.0
it_freccia hr_rana N 0.0
it_corvo hr_ptica N 6.0
hr_puding it_dolce N 5.88
it_capo hr_rep N 0.0
hr_video it_televisione N 0.13
hr_natrag it_fronte N 0.0
it_fare_autostop hr_zvati V 2.0
it_strumento hr_truba N 0.0
it_senso hr_sloboda N 0.0
hr_vjeverica it_scoiattolo N 6.0
hr_morž it_mammifero N 5.75
it_panino hr_obrok N 4.25
hr_sjedalo it_trono N 0.0
hr_bujon it_brodo N 5.75
it_rame hr_novčanik N 0.0
hr_student it_allievo N 3.38
hr_trešnja it_frutto N 6.0
it_orzo hr_hrana N 5.63
hr_aritmetika it_trigonometria N 0.0
it_tacchino hr_ptica N 5.88
hr_hipoteza it_teoria N 3.63
hr_krilo it_aereo N 0.0
hr_zatvarač it_pantaloni N 0.0
it_hamburger hr_ptica N 0.0
hr_tkanina it_cotone N 0.0
it_rivista hr_bilježnica N 0.13
it_laccio hr_cipela N 0.0
hr_rakun it_animale N 6.0
hr_svjedočiti it_raccontare V 5.5
hr_tegliti it_spostare V 4.63
hr_kauč it_divano N 5.88
it_guerra hr_anatomija N 0.0
hr_ceremonija it_funerale N 0.0
it_pallacanestro hr_sport N 6.0
it_poeta hr_osoba N 6.0
hr_preraditi it_sprecare V 0.25
hr_čekić it_cancro N 0.0
hr_stolica it_mobilio N 6.0
hr_vještica it_donna N 5.38
hr_pakao it_inferno N 6.0
it_softball hr_sport N 6.0
it_truffatore hr_bolest N 0.0
hr_ladica it_ufficio N 0.0
hr_rotkvica it_carota N 0.25
it_microscopio hr_teleskop N 0.0
hr_slaganje it_disaccordo N 0.0
hr_zabraniti it_impedire V 4.88
it_letto hr_namještaj N 6.0
hr_naramenica it_reggiseno N 0.0
it_origano hr_hrana N 3.75
it_veleno hr_toksin N 5.75
it_cassetto hr_ured N 0.0
it_professionista hr_stručnjak N 4.5
it_anatra hr_ptica N 5.5
it_autostrada hr_cesta N 5.88
hr_lanac it_legame N 4.5
it_minoranza hr_zahod N 0.0
it_animale hr_spremnik N 0.0
hr_obećanje it_scalare V 0.0
hr_razumjeti it_accettare V 2.0
hr_najlon it_materiale N 6.0
hr_guska it_uccello N 5.63
it_notizia hr_informacija N 5.25
hr_smrt it_nascita N 0.0
it_formula hr_pekar N 0.0
hr_vrata it_porta N 4.25
it_gallone hr_mjera N 5.88
hr_amater it_possesso N 0.0
hr_sposobnost it_forza N 2.63
hr_alkohol it_sostanza N 5.5
hr_razlog it_causa N 3.5
it_riciclare hr_baciti V 0.25
hr_leš it_trono N 0.0
it_spinaci hr_povrće N 6.0
hr_držati it_controllare V 1.63
it_topo hr_štakor N 0.0
hr_cvrčak it_animale N 6.0
it_rosa hr_vino N 0.13
it_arma hr_pištolj N 0.13
it_capo hr_igla N 0.0
it_sicurezza hr_opasnost N 0.13
hr_govoriti it_bussare V 0.0
it_seguace hr_vođa N 0.13
it_giocattolo hr_lutka N 0.0
it_atrio hr_zgrada N 0.38
it_talento hr_sposobnost N 5.38
it_ravanello hr_mrkva N 0.25
it_esistenza hr_život N 2.0
it_figlio hr_roditelj N 0.25
hr_šaka it_braccio N 0.25
hr_ubrzati it_costruire V 0.0
it_pesce_persico hr_riba N 6.0
hr_pokazati it_unire V 0.0
it_fratello hr_bratstvo N 0.13
hr_izračunati it_consegnare V 0.38
hr_gusak it_uccello N 5.38
it_anca hr_tijelo N 0.25
hr_liječenje it_sassofono N 0.0
hr_pramac it_sinistra N 0.0
hr_komora it_fiaba N 0.0
it_tenore hr_pjevač N 5.88
hr_špinat it_verdura N 6.0
it_architettura hr_voda N 0.0
hr_osoba it_idolo N 1.13
it_borsetta hr_zdjela N 0.0
it_vocabolario hr_govor N 0.13
hr_sport it_pallavolo N 0.0
it_dodici hr_broj N 6.0
hr_katedrala it_edificio N 5.75
it_bacca hr_trešnja N 0.0
hr_unca it_misura N 5.88
it_grano hr_žitarica N 5.88
hr_instrument it_tromba N 0.0
hr_palac it_piede N 0.0
it_mora hr_voće N 5.75
hr_sudbina it_vestito N 0.0
hr_napredovati it_prendere V 1.0
it_pistola hr_vatreno_oružje N 6.0
it_mazza hr_opaliti N 4.25
hr_bacač it_ricevitore N 0.13
it_pala hr_kanta N 0.0
hr_šepati it_camminare V 4.88
hr_novčanik it_ventiquattrore N 0.38
hr_zaboraviti it_diminuire V 0.75
it_aritmetica hr_matematika N 5.5
it_animale hr_slon N 0.0
hr_krema it_costruzione N 0.0
it_tessuto hr_most N 0.0
it_capelli hr_sisavac N 0.0
hr_ekipa it_squadra N 6.0
it_semestre hr_sat N 0.0
hr_trokut it_forma N 6.0
hr_stado it_gruppo N 5.75
it_eroina hr_žena N 5.5
hr_stopa it_pollice N 0.0
it_guardare hr_škiljiti V 0.0
hr_čovjek it_enciclopedia N 0.25
it_ravanello hr_povrće N 6.0
it_agguantare hr_uloviti V 5.0
it_fidanzato hr_ljubavnik N 3.88
hr_problem it_difficolta' N 5.63
hr_šišmiš it_animale N 6.0
hr_dupin it_ossigeno N 0.0
hr_torbica it_ciotola N 0.0
it_pollo hr_hrana N 5.75
it_pugnale hr_nož N 5.0
it_dinosauro hr_životinja N 5.63
it_produttore hr_tvorac N 5.38
hr_avenija it_strada N 5.38
hr_dotaknuti it_afferrare V 0.25
hr_gravitacija it_forza N 5.75
hr_princ it_capitano N 0.88
it_nuotare hr_trčati V 0.0
it_comprensione hr_znanje N 2.5
it_dare hr_poslati V 1.13
it_cratere hr_vulkan N 0.0
hr_večera it_pasto N 5.5
it_budino hr_desert N 5.88
hr_badem it_arachide N 0.0
it_squadra hr_skupina N 5.75
hr_neprijatelj it_coccodrillo N 0.13
it_amore hr_osjećaj N 6.0
hr_pričvrstiti it_collegare V 3.25
hr_prekinuti it_iniziare V 0.13
hr_rebro it_animale N 0.0
hr_mandarina it_frutta N 6.13
hr_srna it_animale N 6.0
it_sigaretta hr_cigara N 2.13
hr_medikament it_rimedio N 5.38
hr_gorila it_scimmia N 6.0
it_acqua hr_tekućina N 5.88
hr_ljubomora it_sensazione N 6.0
it_falce hr_alat N 5.63
it_mascella hr_kost N 6.0
it_tramonto hr_večer N 0.75
hr_oklop it_tartaruga N 0.0
hr_grah it_verdura N 4.5
it_foca hr_životinja N 6.0
hr_leksikon it_libro N 5.5
hr_doći it_partire V 0.63
it_portone hr_ulaz N 5.63
it_stella hr_ljuska N 0.0
it_chimico hr_znanstvenik N 5.63
hr_stroj it_spezia N 0.0
it_penna hr_flota N 0.0
it_avverbio hr_riječ N 5.63
it_fede hr_religija N 1.38
it_uvetta hr_voće N 5.38
hr_zidar it_lavoratore N 6.0
it_intestino hr_trbuh N 0.0
hr_utočište it_riparo N 4.0
hr_instrument it_tuba N 0.0
it_muovere hr_tegliti V 0.25
hr_sjena it_luce N 1.0
hr_plin it_auto N 0.0
it_re hr_vođa N 5.13
hr_primiti it_ottenere V 4.13
hr_časopis it_taccuino N 0.13
it_carrozza hr_kočija N 6.0
it_politico hr_senator N 0.0
hr_banana it_frutta N 6.0
hr_zadirkivati it_eseguire V 1.0
hr_vanilija it_gusto N 5.63
hr_uš it_insetto N 6.0
it_perno hr_bik N 0.38
it_latte hr_tekućina N 5.88
hr_izlazak it_tramonto N 0.0
it_cadavere hr_tron N 0.0
it_guerra hr_sukob N 5.5
hr_otrov it_veleno N 5.75
it_professionista hr_profesor N 0.25
it_sacerdote hr_rabin N 0.0
it_cozza hr_plodovi_mora N 5.88
it_medicazione hr_tretman N 5.13
hr_vatra it_acqua N 0.0
it_squadra hr_tim N 6.0
it_cricket hr_sport N 6.0
hr_kriket it_gioco N 5.75
it_viaggiare hr_autostopirati V 0.0
hr_lopta it_gioco N 1.88
it_gravita' hr_sila N 5.75
it_lana hr_tkanina N 6.0
hr_rame it_gomito N 0.0
it_aspettare hr_oklijevati V 1.5
it_poltrona hr_sjedalo N 5.0
it_mammifero hr_slon N 0.0
hr_breskva it_frutta N 6.0
hr_autostopirati it_chiamare V 2.0
hr_napraviti it_costruire V 0.88
it_matrimonio hr_igla N 0.0
it_cerimonia hr_oštrica N 0.0
it_rettile hr_životinja N 6.0
it_tronco hr_oaza N 0.0
it_tecnologia hr_znanje N 2.63
hr_izvan it_dentro N 0.0
hr_zarumeniti_se it_abbronzarsi V 1.75
hr_putovati it_fare_autostop V 0.0
it_legislatura hr_vlada N 3.13
it_macchina hr_računalo N 0.0
hr_šah it_gioco N 5.75
it_pecora hr_ovca N 5.5
it_mattina hr_noć N 0.0
it_pranzo hr_večera N 0.13
it_infastidire hr_zafrkavati V 2.38
hr_puž it_animale N 6.0
hr_lopatica it_utensile N 5.75
it_fungo hr_čudovište N 0.0
it_papero hr_biologija N 0.13
it_tacchino hr_meso N 5.88
it_pianta hr_životinja N 0.0
hr_umakati it_intingere V 4.88
hr_uređaj it_telefono N 0.0
hr_trava it_midollo N 0.0
hr_hipoteza it_piscina N 0.0
hr_pjesnik it_persona N 6.0
hr_mikroskop it_telescopio N 0.0
hr_pogoršati it_dimenticare V 0.13
it_cane hr_životinja N 6.0
it_persona hr_građanin N 0.25
it_fagiolo hr_hrana N 5.88
hr_pustiti it_tenere V 0.0
hr_piće it_gin N 0.0
it_pane hr_nogomet N 0.0
hr_tehničar it_lavoratore N 5.63
hr_slomiti it_spiegare V 0.0
it_dare_la_colpa hr_staviti V 0.0
hr_brat it_sorella N 0.0
it_moglie hr_žena N 6.0
it_procedura hr_suza N 0.0
hr_med it_zucchero N 0.5
hr_led it_ghiacciaio N 0.0
it_baseball hr_igra N 5.88
hr_vrat it_ruscello N 0.0
it_stipendio hr_plaća N 5.0
it_rompere hr_zdrobiti V 0.75
it_tenere hr_kontrolirati V 1.63
it_mandria hr_skupina N 5.75
it_proteina hr_meso N 0.0
hr_labud it_animale N 6.0
hr_neovisnost it_liberta' N 5.63
hr_mikrovalna it_apparecchio N 6.0
hr_stopa it_misura N 4.0
it_presumere hr_razmišljati V 4.63
it_scimmia hr_životinja N 6.0
hr_osjećaj it_gelosia N 0.0
hr_uzeti it_conservare V 1.0
hr_bundeva it_zucca N 5.63
it_tacco hr_cipela N 0.38
it_accettare hr_poreći V 0.0
hr_pratiti it_seguire V 5.0
it_ala hr_anđeo N 0.0
it_sedano hr_hrana N 5.75
it_erba hr_biljka N 5.5
hr_obrok it_penna N 0.0
it_foschia hr_oblak N 3.5
it_cresta hr_vrh N 2.13
hr_utvara it_spirito N 3.5
hr_tražiti it_esaminare V 0.0
hr_reći it_raccomandare V 0.13
hr_tuljan it_aquilone N 0.0
it_foca hr_zmaj N 0.0
it_frammento hr_komad N 4.63
hr_životinja it_ratto N 0.0
it_quadrato hr_oblik N 6.0
it_talpa hr_životinja N 6.0
hr_biljka it_animale N 0.0
it_giuria hr_sud N 3.0
hr_osa it_ape N 0.13
it_festa hr_okupljanje N 5.0
hr_odvažnost it_coraggio N 5.5
it_disegnare hr_stvoriti V 4.0
hr_zemlja it_materia N 5.13
hr_sila it_gravita' N 0.0
hr_rog it_auto N 0.0
it_cascata hr_rijeka N 2.13
it_edificio hr_neboder N 0.0
it_Gesu' hr_bog N 5.0
it_classe hr_skupina N 5.63
hr_vozilo it_auto N 0.0
hr_Jupiter it_Plutone N 0.0
it_vitello hr_životinja N 6.0
hr_krokodil it_animale N 6.0
hr_torbica it_cameriere N 0.0
hr_metodist it_battista N 0.0
hr_navigator it_marinaio N 2.63
it_lumaca hr_hrabrost N 0.0
hr_dijete it_genitore N 0.25
hr_lipa it_nichelino N 0.38
it_benzina hr_automobil N 0.0
it_animale hr_janje N 0.0
hr_kalkulator it_computer N 4.0
hr_spavaonica it_casa N 0.38
hr_obrisati it_catturare V 0.0
hr_sendvič it_pasto N 4.25
hr_autoritet it_potere N 4.75
hr_čeljust it_osso N 6.0
it_cappotto hr_kamin N 0.0
it_mettere hr_ljuljati V 0.0
it_opossum hr_životinja N 6.0
it_stomaco hr_trbuh N 0.5
hr_prepreka it_muro N 1.25
hr_ladica it_credenza N 0.0
hr_rat it_conflitto N 5.5
hr_bodež it_arma N 5.88
it_persona hr_izdavač N 0.0
it_bisturi hr_alat N 6.0
hr_priznati it_ignorare V 0.0
it_aquila hr_ptica N 6.0
it_mobilio hr_fotelja N 0.0
it_focena hr_kit N 5.0
hr_kruh it_calcio N 0.0
it_mollusco hr_hrana N 5.0
hr_polica it_armadietto N 0.88
hr_autor it_creatore N 5.25
it_guasto hr_neuspjeh N 2.25
it_arte hr_skulptura N 0.0
hr_poslužiteljica it_cameriera N 0.75
it_parlare hr_vrištati V 0.13
it_circostanza hr_situacija N 4.0
hr_komarac it_saggezza N 0.0
it_noce hr_stablo N 6.0
hr_prizma it_forma N 6.0
it_conferenza hr_sastanak N 5.0
hr_glavobolja it_dolore N 6.0
it_arrossire hr_preplanuti V 1.75
it_materiale hr_koža N 0.0
hr_željeti it_separare V 0.0
hr_pastuh it_toro N 0.38
it_porto hr_sklonište N 4.0
it_piccolo_insetto hr_insekt N 6.0
it_anatomia hr_čovjek N 0.13
it_chip hr_računalo N 0.13
it_avvenimento hr_posteljina N 0.0
it_inferno hr_pakao N 6.0
hr_limuzina it_veicolo N 5.88
it_genitore hr_odnos N 3.25
it_puzzare hr_odbaciti V 0.0
hr_jasle it_trattamento N 0.13
hr_glava it_coda N 0.0
hr_aroma it_manica N 0.0
it_gene hr_kromosom N 0.5
hr_krilo it_uccello N 0.0
it_ronzare hr_letjeti V 2.5
hr_žena it_braccialetto N 0.0
hr_vrlina it_qualita' N 5.0
it_stella hr_galaksija N 0.13
it_nylon hr_pamuk N 0.0
it_radio hr_medij N 6.0
hr_analiza it_studio N 4.5
hr_bakalar it_pesce N 6.0
it_curva hr_cesta N 1.5
it_pietra hr_stijena N 3.0
hr_bilješka it_comunita'_di_donne N 0.0
it_cliente hr_osoba N 5.13
hr_isus it_Dio N 5.0
hr_saksofon it_strumento N 6.0
hr_sin it_figlia N 0.0
hr_početak it_fine N 0.0
hr_srž it_osso N 0.75
it_matematica hr_znanost N 6.0
hr_helij it_gas N 6.0
hr_sjekira it_strumento N 5.88
it_tricheco hr_sisavac N 5.75
hr_govoriti it_urlare V 0.13
it_pranzo hr_violina N 0.0
hr_peršin it_salvia N 0.0
it_ufficiale hr_policija N 0.5
hr_teren it_stadio N 0.75
hr_anatomija it_umano N 0.13
hr_tekućina it_tastiera N 0.0
it_danno hr_šteta N 5.5
hr_pamuk it_tessuto N 5.5
hr_čip it_computer N 0.13
hr_nakit it_anello N 0.0
it_attenzione hr_fokus N 2.88
it_maiale hr_meso N 6.0
hr_mozak it_movimento N 0.0
hr_antilop it_pelle N 5.75
hr_tjedan it_anno N 0.0
hr_kovčeg it_borsa N 4.0
it_caviglia hr_noga N 0.0
hr_nogomet it_pallacanestro N 0.13
hr_tišina it_suono N 1.5
it_regione hr_partner N 0.0
it_analisi hr_trigonometrija N 0.0
hr_nada it_disperazione N 0.0
hr_zadaća it_lavoro N 4.25
it_topo hr_glodavac N 6.0
it_Giove hr_Pluton N 0.0
it_thermos hr_spremnik N 5.63
it_esempio hr_instanca N 5.63
hr_drhtati it_tremare V 5.75
it_bollire hr_zamrznuti V 0.0
hr_tri it_sei N 0.0
hr_atletičar it_atleta N 6.0
it_sposa hr_vjenčanje N 0.0
hr_lanac it_bicicletta N 0.0
it_arachide hr_indijski_oraščić N 0.0
it_isola hr_zemlja N 3.5
hr_podbaciti it_operare V 0.0
hr_krevet it_mobilio N 6.0
hr_atom it_mitologia N 0.0
hr_carstvo it_stato N 3.75
hr_majka it_donna N 5.88
it_prendere hr_zadržati V 1.0
it_triangolo hr_oblik N 6.0
hr_brat it_famiglia N 3.75
it_inzuppare hr_umočiti V 4.88
it_assumere hr_pretpostaviti V 0.75
hr_kralj it_capo N 5.13
hr_kanu it_barca N 5.75
hr_otvor it_Ingresso N 2.38
it_miglio hr_inč N 0.0
hr_lanac it_fasciatura N 0.38
hr_komunikacija it_conversazione N 0.88
hr_cvijet it_offesa N 0.0
hr_pogreška it_sovrano N 0.0
it_messaggio hr_bilješka N 3.13
it_frutti_di_mare hr_dagnja N 0.0
it_traditore hr_lopov N 0.88
it_fragola hr_voće N 6.0
hr_znanost it_geologia N 0.0
hr_pocrvenjeti it_chiarire V 0.0
hr_prsa it_petto N 4.0
hr_manira it_stile N 4.75
it_opinione hr_misao N 4.63
it_piede hr_mjera N 4.0
it_Saturno hr_Venera N 0.0
it_tenere hr_dati V 0.0
hr_aleja it_strada N 5.29
it_cena hr_dinosaur N 0.0
it_rettile hr_aligator N 0.0
it_televisione hr_medij N 6.0
it_pietra hr_nakit N 1.88
hr_tekućina it_sostanza N 5.38
hr_školjka it_cibo N 5.13
it_sedano hr_povrće N 6.0
it_insalata_di_cavolo hr_salata N 6.0
it_Asia hr_Afrika N 0.0
it_monaco hr_protivnik N 0.0
hr_kljova it_elefante N 0.0
hr_lopov it_malattia N 0.0
it_mangusta hr_životinja N 5.88
hr_luk it_cibo N 5.25
hr_lisičine it_manica N 0.0
it_masso hr_kamen N 4.63
hr_zgrada it_grattacielo N 0.0
hr_slika it_lavatrice N 0.0
hr_burbon it_alcol N 6.0
it_suggerire hr_reći V 4.63
hr_pingvin it_animale N 6.0
it_sposa hr_brak N 0.0
hr_kauč it_sedia N 2.38
it_vescovo hr_kralj N 0.25
it_sopraffare hr_uzrujati V 0.38
it_spalla hr_tijelo N 0.0
hr_otisak it_prova N 5.5
hr_katedrala it_ferita N 0.0
it_macchina_fotografica hr_anatomija N 0.0
hr_zid it_camera N 0.0
hr_guska it_tacchino N 0.25
it_giorno hr_tjedan N 0.0
it_professore hr_profesionalac N 4.25
hr_klupa it_posto_a_sedere N 5.63
hr_odgovor it_domanda N 0.19
it_fegato hr_biolog N 0.0
it_dritta hr_zahod N 0.0
hr_orah it_albero N 6.0
it_gioiello hr_prsten N 0.0
it_proteggere hr_braniti V 5.5
it_forma hr_trokut N 0.0
it_lattuga hr_hrana N 5.63
hr_cement it_pietra N 0.88
it_picca hr_šiljak N 0.0
it_compagno hr_brak N 0.0
hr_esej it_paragrafo N 0.25
it_ovest hr_smjer N 6.0
hr_skupina it_banda N 0.5
hr_kirurgija it_vacanza N 0.0
hr_remi it_gioco N 5.88
it_grattacielo hr_sastanak N 0.13
hr_reminiscencija it_memoria N 5.5
it_lavatrice hr_uređaj N 5.75
it_creatura hr_buba N 0.0
hr_tvar it_acqua N 0.0
hr_udio it_percentuale N 1.63
it_lavoratore hr_stolar N 0.0
hr_limun it_agrume N 6.0
it_armatura hr_tavan N 0.0
hr_poreći it_schiacciare V 0.13
hr_klokan it_animale N 6.0
it_aroma hr_rukav N 0.0
it_albero hr_biljka N 5.0
it_catena hr_zavoj N 0.38
it_sicurezza hr_osiguranje N 0.38
hr_čelik it_lama N 0.5
hr_proizvođač it_creatore N 5.06
hr_svemir it_mondo N 0.38
it_compressa hr_pilula N 5.13
hr_brak it_ago N 0.0
it_persona hr_idol N 1.13
hr_teza it_affermazione N 4.63
it_camion hr_vozilo N 6.0
it_unghia hr_kandža N 3.0
it_brocca hr_posuda N 5.75
it_riconoscere hr_prihvatiti V 3.25
hr_mrav it_insetto N 6.0
hr_bršljan it_pianta N 6.0
it_genere hr_spol N 1.75
hr_životinja it_agnello N 0.0
hr_naranča it_frutta N 6.0
it_fondazione hr_organizacija N 4.88
it_madre hr_otac N 0.0
hr_nevjesta it_raduno N 0.0
it_scarabocchiare hr_pisati V 4.88
it_succo hr_mlijeko N 0.0
it_ondeggiare hr_micati_se V 5.63
it_distruggere hr_okusiti V 0.0
it_metro hr_mjera N 5.75
hr_žaba it_animale N 6.0
it_ghiaccio hr_ledenjak N 0.0
hr_ujediniti it_dividere V 0.0
it_disegno hr_slikanje N 4.38
it_arma hr_mač N 0.0
it_apice hr_točka N 4.25
it_lavoratore hr_rad N 0.0
it_missione hr_zadatak N 5.38
hr_ščepati it_catturare V 5.0
it_ciliegia hr_grožđe N 0.0
it_soffiare hr_puknuti V 0.38
it_madre hr_žena N 5.63
hr_amater it_paradiso N 0.0
it_rifiutare hr_prihvatiti V 0.0
hr_sačuvati it_tenere V 4.38
it_quiz hr_test N 5.38
hr_pozicija it_luogo N 4.75
it_sassofono hr_tretman N 0.0
it_semaforo hr_signal N 5.25
hr_predak it_genitore N 1.5
hr_Saturn it_Venere N 0.0
it_re hr_monarh N 5.75
it_atlante hr_knjiga N 5.63
it_controfiletto hr_meso N 5.88
it_schizzo hr_crtež N 5.5
it_tifone hr_oluja N 5.25
it_oca hr_purica N 0.25
hr_korov it_veleno N 0.25
hr_izumiti it_creare V 4.38
hr_službenik it_calcolo N 0.0
hr_udariti it_far_scoppiare V 0.38
hr_zadovoljstvo it_mandria N 0.0
hr_štititi it_difendere V 5.5
hr_prestiž it_stato N 3.63
it_richiesta hr_tražiti V 5.75
hr_imenica it_verbo N 0.0
hr_Azija it_Africa N 0.0
hr_tlo it_doccia N 0.0
hr_razbiti it_schiacciare V 0.63
hr_tjestenina it_impasto N 3.88
it_blu hr_boja N 6.0
hr_tlo it_terra N 2.63
it_violino hr_violončelo N 0.0
it_pane hr_hrana N 6.0
hr_papar it_sale N 0.0
it_tastiera hr_ruka N 0.0
hr_nomad it_persona N 5.63
hr_brisati it_strofinare V 2.63
hr_leopard it_tigre N 0.13
hr_objaviti it_dire V 5.0
hr_partner it_matrimonio N 0.0
it_stella hr_simbol N 5.13
hr_tuga it_padre N 0.0
it_formichiere hr_životinja N 5.88
it_padre hr_predak N 5.25
it_oboe hr_instrument N 6.0
hr_osjećaj it_empatia N 0.38
hr_baseball it_gioco N 5.88
hr_brašno it_impasto N 0.0
hr_golubica it_uccello N 6.0
it_bevanda hr_tonik N 0.0
hr_ruža it_vino N 0.13
hr_dotaknuti it_pizzicare V 0.0
hr_savjetovati it_parlare V 3.63
it_lumaca hr_životinja N 6.0
it_assassino hr_lopov N 0.75
it_accettare hr_dopustiti V 2.88
hr_večera it_dinosauro N 0.0
hr_kupina it_frutta N 5.75
hr_jezik it_comunicazione N 5.5
it_guardare hr_rastegnuti V 0.0
hr_oštećenje it_danno N 5.5
it_rimorso hr_kajanje N 5.38
hr_šest it_Sette N 0.0
hr_izblijediti it_svanire V 5.5
hr_sok it_bevanda N 6.0
it_dittatore hr_vladar N 5.88
hr_dohvatiti it_aumentare V 0.0
it_conflitto hr_rat N 1.25
hr_autocesta it_strada N 5.94
it_pittura hr_umjetnost N 5.5
it_mostrare hr_ujediniti V 0.0
it_urtare hr_samljeti V 0.0
hr_mesar it_panettiere N 0.0
it_gesso hr_bojica N 2.0
it_dipendente hr_radnik N 4.5
hr_dati it_inviare V 1.13
it_auto hr_automobil N 6.0
it_fare_un'osservazione hr_ubiti V 0.13
it_scavatore hr_radnik N 5.5
it_pane hr_sendvič N 0.0
hr_ugušiti it_uccidere V 5.5
it_destino hr_potok N 0.0
it_avanzare hr_uzeti V 1.0
hr_srce it_intelletto N 0.0
it_zio hr_tetka N 0.0
hr_ječam it_cibo N 5.63
it_catena hr_brava N 2.25
hr_kćer it_figlio N 0.0
it_edera hr_biljka N 6.0
hr_tvorac it_artista N 1.88
it_sostantivo hr_pridjev N 0.0
hr_oteti it_prendere V 5.0
it_concorrenza hr_utrka N 1.38
it_iglu' hr_koliba N 3.63
it_cordolo hr_strana N 1.5
it_obbiettivo hr_postignuće N 2.88
hr_dom it_luogo N 5.75
hr_magla it_nube N 3.5
hr_ogrlica it_braccialetto N 0.13
hr_majoneza it_cibo N 5.13
it_macchiare hr_obrisati V 0.0
hr_grlo it_collo N 0.13
it_ridacchiare hr_smijati_se V 5.88
hr_tjedan it_inizio N 0.0
it_educare hr_podučavati V 4.25
it_ala hr_zrakoplov N 0.0
hr_zalogajnica it_ristorante N 5.63
hr_vilica it_moda N 0.0
hr_doba it_tempo N 5.25
it_cavolo hr_hrana N 5.63
hr_kontaktna_leća it_lente N 5.75
it_mal_di_testa hr_simptom N 5.13
hr_redovnica it_softball N 0.0
it_verdura hr_rajčica N 0.0
it_diametro hr_dužina N 5.0
it_virtu' hr_pejzaž N 0.0
it_serpente hr_životinja N 5.88
hr_pjesma it_sonetto N 0.25
hr_sigurnost it_assicurazione N 0.38
hr_poremećaj it_ordine N 0.25
it_pidocchio hr_buba N 6.0
hr_geometrija it_matematica N 5.5
it_legislatura hr_legija N 0.0
hr_vratiti it_inviare V 1.25
it_dipartimento hr_organizacija N 2.88
hr_zapovjednik it_tenente N 0.5
it_estasi hr_osjećaj N 5.63
hr_direktor it_supervisore N 4.63
hr_odsutnost it_medicina N 0.0
hr_taksi it_taxi N 6.0
it_culmine hr_priča N 0.0
it_porta hr_ulaz N 5.13
hr_vrata it_ingresso N 5.38
hr_povijest it_gioiello N 0.0
it_avere_un_brivido hr_tresti_se V 5.75
hr_odreći_se it_modificare V 2.25
it_canarino hr_pero N 0.0
it_elefante hr_predavanje N 0.0
hr_rat it_anatomia N 0.0
it_tamburo hr_instrument N 6.0
hr_kofein it_te' N 0.0
hr_materijal it_gomma N 0.0
hr_rog it_capra N 0.0
it_dieci_centesimi hr_kuna N 0.38
hr_fijaker it_carrozza N 6.0
hr_kaktus it_pianta N 6.0
hr_zvijezda it_conchiglia N 0.0
it_liquore hr_džin N 0.0
it_thermos hr_boca N 5.13
hr_crijevo it_stomaco N 0.0
it_dondolare hr_postaviti V 0.0
it_brillare hr_sjajiti V 5.38
hr_mir it_guerra N 0.0
it_softball hr_nogomet N 0.0
it_auto hr_limuzina N 0.0
it_cura hr_lijek N 5.38
it_pistola hr_oružje N 6.0
hr_ljubav it_sentimento N 6.0
it_cerimonia hr_diploma N 0.0
hr_nasloniti it_posare V 3.88
hr_talac it_prigioniero N 5.75
it_presidente hr_vođa N 5.0
it_disintegrare hr_spaliti V 0.38
it_sostanza hr_voda N 0.0
it_capovolgere hr_braniti V 0.13
it_abbracciare hr_držati V 3.25
hr_kolačić it_cibo N 6.0
hr_hihotati_se it_ridere V 5.88
hr_rep it_acqua N 0.0
hr_misao it_riflessione N 4.0
it_volpe hr_životinja N 6.0
hr_rukovoditelj it_persona N 5.38
it_incapacita' hr_sposobnost N 0.0
it_malattia hr_zdravlje N 0.31
hr_vidra it_animale N 6.0
hr_brat it_confraternita N 0.13
it_azienda hr_organizacija N 3.88
hr_lijes it_bara N 5.5
hr_šest it_numero N 6.0
hr_mit it_leggenda N 3.88
hr_jetra it_organo N 6.0
hr_ružičasta it_viola N 0.5
hr_plin it_automobile N 0.0
it_shock hr_reakcija N 6.0
hr_stolica it_gabinetto N 0.0
hr_greška it_fallimento N 2.25
it_lime hr_voće N 5.88
it_cascata hr_tenis N 0.0
it_camicia_da_notte hr_rublje N 3.5
hr_zvijezda it_simbolo N 5.13
hr_pridjev it_verbo N 0.0
hr_pločnik it_sentiero N 4.13
it_autorita' hr_moć N 4.75
it_scheggia hr_komad N 3.63
it_scimmia hr_zvijer N 3.75
it_braccialetto hr_ogrlica N 0.63
hr_imenica it_parola N 6.0
hr_životinja it_contenitore N 0.0
it_erba hr_otrov N 0.25
hr_kapetan it_ufficiale N 4.0
hr_nogomet it_sport N 6.0
it_stuzzicare hr_gnjaviti V 4.25
hr_razdoblje it_puberta' N 0.0
hr_pijetao it_pollo N 0.5
it_edificio hr_katedrala N 0.0
hr_kruh it_panino N 0.0
hr_napasti it_rimuovere V 0.38
hr_veza it_relazione N 6.0
hr_kralj it_regina N 0.0
it_gamberetto hr_plodovi_mora N 6.0
hr_frustracija it_rabbia N 2.75
it_concerto hr_događaj N 5.88
hr_raspored it_elenco N 3.38
it_spatola hr_oruđe N 5.75
it_martello hr_rak N 0.0
hr_mreža_za_ležanje it_letto N 3.5
hr_jutro it_intelligenza N 0.0
hr_meso it_umano N 0.0
hr_promatrati it_abbronzarsi V 0.0
hr_stroj it_computer N 0.0
it_salvare hr_slomiti V 0.0
it_distruggere hr_zdrobiti V 0.63
it_creatore hr_umjetnik N 1.88
hr_golf it_gioco N 5.63
it_moglie hr_prsten N 0.0
it_nozione hr_ustav N 0.25
hr_svila it_materiale N 6.0
hr_cigareta it_tabacco N 2.13
hr_otac it_figlio N 0.25
hr_odvojiti it_dividere V 5.25
hr_naučiti it_sviluppare V 4.13
it_estremita' hr_noga N 0.0
hr_bradavica it_neo N 1.13
it_religione hr_vjerovanje N 5.63
hr_idol it_spada N 0.0
it_prezzemolo hr_kadulja N 0.0
hr_mudrost it_conoscenza N 4.13
hr_usluga it_sbaglio N 0.0
it_separare hr_podijeliti V 5.25
hr_zahtijevati it_richiesta V 5.75
hr_pivo it_liquido N 6.0
hr_maramica it_pasto N 0.0
hr_pijesak it_spiaggia N 0.75
it_sei hr_sedam N 0.0
it_assicurazione hr_sigurnost N 3.88
hr_fotoaparat it_anatomia N 0.0
hr_pamuk it_materiale N 5.63
it_sporcizia hr_nečistoća N 5.75
it_gufo hr_životinja N 6.0
hr_televizija it_mezzo_di_comunicazione N 6.0
it_trigonometria hr_algebra N 0.5
hr_zgrabiti it_prendere V 5.0
it_microonde hr_uređaj N 6.0
it_imparare hr_suditi V 0.13
hr_puknuti it_fare_scoppiare V 0.88
it_sbaglio hr_greška N 5.25
hr_metar it_misura N 5.75
hr_bolest it_cancro N 0.0
it_cassiere hr_osoba N 5.75
hr_riba it_squalo N 0.0
it_lettera hr_abeceda N 0.0
it_lettera hr_tekst N 5.38
it_che_sta_seduto hr_stajanje N 0.0
hr_podijeliti it_strappare V 0.5
hr_kopač it_lavoratore N 5.5
it_suora hr_softball N 0.0
it_mandorla hr_kikiriki N 0.0
it_tenore hr_gubitnik N 0.0
hr_mlažnjak it_aereo N 6.0
it_uccidere hr_ubiti V 5.88
hr_časopis it_pubblicazione N 5.5
hr_svjetlo it_segnale N 5.25
hr_heroina it_donna N 5.5
it_accelerare hr_izgraditi V 0.0
hr_gulaš it_cibo N 5.75
it_navigatore hr_mornar N 2.63
hr_kuhati it_congelare V 0.0
it_ascesa hr_silazak N 0.0
it_lavoratore hr_mehaničar N 0.0
hr_izdajnik it_ladro N 0.88
it_tessuto hr_koža N 0.0
hr_nevinost it_uva N 0.0
hr_rotkvica it_verdura N 6.0
hr_usta it_universo N 0.0
hr_skalpel it_strumento N 5.69
it_padre hr_majka N 0.0
it_schiacciare hr_demolirati V 4.38
it_verde hr_žuta N 0.13
hr_buba it_creatura N 6.0
it_marrone hr_zelena N 0.0
it_casco hr_zaštita N 6.0
hr_pobjednik it_perdente N 0.0
it_anatomia hr_znanost N 5.38
hr_hrana it_salsiccia N 0.0
it_dividere hr_dodati V 0.13
it_cotone hr_materijal N 5.63
it_vespa hr_pčela N 0.13
it_furgone hr_vozilo N 6.0
it_lettore hr_osoba N 5.75
hr_torta it_cibo N 5.63
hr_namještaj it_poltrona N 0.0
hr_prevrnuti it_difendere V 0.13
hr_okolnost it_situazione N 4.0
it_confraternita hr_klub N 5.38
hr_sporazum it_panchina N 0.0
it_abbondanza hr_nestašica N 0.0
it_mollusco hr_dagnja N 0.0
hr_šunka it_carne N 6.0
it_conflitto hr_neslaganje N 4.88
it_uccello hr_gusak N 0.38
hr_kuk it_corpo N 0.25
hr_crta it_unguento N 0.0
it_motociclo hr_bicikl N 1.0
hr_radnik it_lavoro N 0.0
hr_oblik it_prisma N 0.0
hr_brašno it_nozze N 0.0
it_farina hr_kruh N 0.0
hr_pozornica it_piattaforma N 4.25
hr_dohvatiti it_costruire V 0.0
it_grattacielo hr_zgrada N 6.0
hr_poreći it_reprimere V 2.63
hr_upozoriti it_consigliare V 4.13
it_colt hr_pištolj N 5.75
hr_tanjur it_cucchiaio N 0.0
hr_voda it_pozzanghera N 0.0
hr_radio it_mezzo_di_comunicazione N 6.0
hr_podne it_giorno N 0.75
it_polsino hr_rukav N 0.0
it_destino hr_kob N 4.88
it_bambola hr_igračka N 6.0
it_speranza hr_očaj N 0.0
hr_zadovoljstvo it_dolore N 0.0
it_gara hr_natjecanje N 5.63
it_attaccare hr_ukloniti V 0.38
hr_rječnik it_discorso N 0.13
hr_uređaj it_lavatrice N 0.0
hr_majka it_femmina N 5.38
hr_sjedenje it_che_sta_in_piedi N 0.0
it_condanna hr_presuda N 4.75
hr_simbol it_lettera N 0.0
it_olimpiadi hr_događaj N 6.0
it_persona hr_narod N 1.0
it_neofita hr_početnik N 5.25
it_tastiera hr_orgulje N 0.0
hr_zanat it_lavoro_a_maglia N 0.0
hr_prodavati it_riconoscere V 0.25
it_lanciare hr_pauzirati V 0.0
hr_službenik it_lavoratore N 5.5
it_forza hr_gravitacija N 0.0
it_alba hr_zalazak N 0.19
hr_dinosaur it_animale N 5.63
hr_lijek it_trattamento N 5.63
hr_sukob it_guerra N 1.25
it_femmina hr_narukvica N 0.0
it_rossetto hr_klasa N 0.0
hr_pecivo it_cibo N 6.0
it_cipolla hr_hrana N 5.25
it_mollusco hr_plodovi_mora N 6.0
hr_put it_sentiero N 2.63
hr_pištolj it_arma N 6.0
hr_jezgra it_atomo N 1.0
it_scuotere hr_micati V 5.25
hr_uvećati it_aumentare V 5.0
hr_peta it_piede N 0.0
hr_gutati it_vendere V 0.0
hr_prepelica it_animale N 5.88
hr_osoba it_scalatore N 0.13
hr_profesionalac it_dilettante N 0.0
it_cucinare hr_spaliti V 0.0
hr_atmosfera it_killer N 0.0
it_insegnante hr_profesionalac N 4.63
hr_misliti it_sospettare V 0.25
it_collana hr_narukvica N 0.13
hr_gušter it_creatura N 6.0
hr_kuhati it_stufare V 0.0
hr_voda it_ghiaccio N 0.13
hr_nadvladati it_irritare V 0.38
hr_parfem it_deodorante N 0.13
hr_konj it_stallone N 0.0
hr_zakonodavstvo it_governo N 3.13
hr_sisavac it_cane N 0.0
it_smettere hr_početi V 0.13
hr_tenor it_cantante N 5.88
it_gomito hr_ruka N 0.13
it_settimana hr_godina N 0.0
it_creare hr_izgraditi V 1.5
it_bagel hr_hrana N 6.0
it_stuzzicare hr_nastupati V 1.0
it_sedersi hr_stajati V 0.13
hr_faza it_rapinatore N 0.0
it_pistola hr_puška N 0.38
hr_cijev it_pistola N 0.0
it_mascella hr_lice N 0.13
hr_trijem it_casa N 0.0
hr_jaje it_architettura N 0.0
it_mescolare hr_integrirati V 2.63
hr_preporučiti it_consigliare V 5.25
hr_kestenjasta it_colore N 5.88
it_fiaba hr_priča N 5.75
hr_pogledati it_valutare V 1.0
hr_miješati it_integrare V 2.63
it_parete hr_prepreka N 4.88
hr_puretina it_carne N 5.88
hr_cvijet it_orchidea N 0.0
hr_sutra it_ieri N 0.38
hr_brat it_relazione N 4.75
hr_prsten it_gioielli N 6.0
it_dito hr_rukavica N 0.0
hr_pero it_uccello N 0.0
hr_obrok it_cena N 0.0
it_otto hr_broj N 6.0
it_genitore hr_obitelj N 4.25
it_falegname hr_radnik N 5.88
hr_pero it_flotta N 0.0
hr_reklama it_pubblicita' N 5.5
hr_porota it_tribunale N 3.0
it_diamante hr_biser N 0.38
hr_misija it_dovere N 3.75
hr_stršljen it_vespa N 0.13
hr_supruga it_donna N 6.0
hr_časnik it_legge N 0.38
hr_nula it_numero N 6.0
it_ciliegia hr_voće N 6.0
it_supporre hr_razmišljati V 4.5
hr_pretpostavljati it_pensare V 4.63
hr_pubertet it_gioventu' N 4.38
it_mucchio hr_plast N 0.0
hr_šok it_reazione N 6.0
it_trainare hr_vući V 4.75
hr_glava it_puntina N 0.0
it_tuba hr_instrument N 6.0
hr_leđa it_corpo N 0.0
hr_pećnica it_apparecchio N 6.0
it_schiena hr_rame N 0.0
hr_tuljan it_animale N 6.0
hr_zob it_cereale N 6.0
hr_dopustiti it_ritornare V 0.0
it_viale hr_cesta N 5.5
hr_pomaknuti it_scaricare V 0.0
hr_izvedba it_posto_a_sedere N 0.0
hr_kvadrat it_cerchio N 0.0
it_prova hr_dokaz N 5.5
it_proibire hr_spriječiti V 4.88
hr_gađati it_lanciare V 2.75
hr_igra it_scacchi N 0.0
it_colonna_vertebrale hr_oslonac N 4.38
hr_snaga it_argilla N 0.0
hr_sirena it_segnale N 5.63
hr_okno it_finestra N 0.63
hr_angažman it_impegno N 4.5
it_picche hr_karta N 4.0
it_canoa hr_čamac N 5.75
it_fabbricante hr_tvorac N 4.75
it_persona hr_vlasnik N 0.0
it_forfora hr_pahulja N 1.75
hr_smokva it_cibo N 5.63
hr_prolaz it_cavalletta N 0.38
it_focus hr_pažnja N 4.75
hr_strah it_tenore N 0.0
it_lingua hr_usta N 0.0
hr_povjetarac it_vento N 5.75
hr_origano it_cibo N 3.75
it_globo hr_sfera N 5.13
it_porzione hr_postotak N 1.63
it_emozione hr_osjećaj N 4.88
hr_tulum it_evento N 5.63
it_mano hr_ruka N 0.25
it_controllo hr_eksperiment N 1.13
it_calcolo hr_salata N 0.0
hr_mrkva it_cibo N 5.88
it_veranda hr_kuća N 0.0
it_ritratto hr_slika N 5.75
it_pallavolo hr_aktivnost N 5.75
it_seta hr_pamuk N 0.0
it_direttore hr_nadglednik N 4.63
it_pasticcino hr_hrana N 5.75
hr_tjestenina it_cibo N 5.75
it_sposare hr_združiti V 5.25
hr_crtati it_creare V 4.0
hr_stožac it_forma N 5.88
it_popcorn hr_hrana N 5.13
it_occhio hr_lice N 0.0
it_contea hr_zemlja N 1.0
it_rima hr_večera N 0.0
it_argilla hr_cigla N 0.25
it_tre hr_šest N 0.0
it_veleno hr_otrov N 6.0
hr_biolog it_chimico N 0.38
it_miele hr_šećer N 0.5
hr_kišobran it_ghiaccio N 0.0
hr_zec it_cibo N 4.5
it_fidanzamento hr_obveza N 4.5
it_superstrada hr_cesta N 6.0
hr_zadaća it_compito N 5.5
hr_špic it_matita N 0.5
hr_odvijač it_martello N 0.0
it_banda hr_skupina N 5.75
hr_zglob it_gomito N 0.0
hr_pomoći it_aggiungere V 0.25
it_squalo hr_riba N 5.75
it_pubblicazione hr_časopis N 0.13
it_mobilio hr_stolica N 0.0
it_centesimo hr_dolar N 0.88
it_scuotere hr_drhtati V 3.38
hr_rezervirati it_tenere V 3.19
hr_prečka it_scala N 1.63
hr_tragedija it_commedia N 0.5
hr_gripa it_malattia N 5.75
it_difendere hr_zaštititi V 5.0
it_lontra hr_životinja N 6.0
hr_korporacija it_attivita'_commerciale N 3.75
it_decomporsi hr_raspadati_se V 5.75
it_scimpanze' hr_gorila N 0.0
it_calcolare hr_dostaviti V 0.38
it_palcoscenico hr_platforma N 4.25
it_toccare hr_pogladiti V 0.0
hr_vjedro it_secchio N 6.0
hr_nokat it_dito_del_piede N 0.0
hr_madrac it_letto N 1.5
hr_plamen it_piacere N 0.25
it_erodere hr_pogoršati_se V 2.63
it_biologia hr_područje N 5.63
it_pianoforte hr_instrument N 6.0
hr_keks it_cibo N 5.88
hr_dodati it_sottrarre V 0.13
hr_odlediti it_sciogliersi V 3.88
hr_cilj it_realizzazione N 2.88
hr_rukavica it_muffola N 0.25
hr_kupus it_verdura N 6.0
hr_nokat it_artiglio N 3.0
it_atomo hr_mitologija N 0.0
it_musica hr_zvuk N 5.88
it_dritta hr_krma N 0.0
hr_vrijednost it_quantita' N 2.88
hr_tehnika it_conoscenza N 3.25
hr_silovanje it_crimine N 6.0
hr_brašno it_pane N 0.0
hr_perilica it_apparecchio N 5.75
it_tappeto hr_sag N 6.0
it_sfrattare hr_preseliti V 2.88
hr_jug it_nord N 0.0
it_baseball hr_nogomet N 0.0
it_spia hr_agent N 5.25
it_melodia hr_napjev N 3.25
hr_zob it_cibo N 5.5
it_geologia hr_misao N 0.5
it_mammifero hr_pas N 0.0
it_poltrona hr_namještaj N 6.0
it_bourbon hr_alkohol N 6.0
hr_rum it_alcol N 6.0
it_persona hr_čitatelj N 0.88
it_coro hr_skupina N 5.75
hr_trigonometrija it_algebra N 0.5
it_maionese hr_hrana N 5.13
hr_bilješka it_messaggio N 5.0
it_litigio hr_sukob N 5.63
hr_poni it_cavallo N 5.88
hr_parada it_marcia N 4.25
it_girare hr_razlikovati V 0.5
it_distruggere hr_uništiti V 5.75
it_biologo hr_kemičar N 0.38
it_comprendere hr_krckati V 0.13
it_nemico hr_krokodil N 0.13
it_domestica hr_djevojka N 2.88
it_sorella hr_sestrinstvo N 0.5
it_alligatore hr_gmaz N 6.0
it_problema hr_teškoća N 5.63
hr_zima it_stagione N 5.88
hr_nož it_spada N 1.0
hr_debata it_parlare V 5.25
hr_točka it_spada N 0.0
it_inganno hr_prevara N 5.38
it_tempo hr_prostor N 0.38
hr_biljka it_rapa N 0.0
it_gabinetto hr_kupaonica N 2.25
hr_kuhati it_bruciare V 0.0
hr_krumpir it_pomodoro N 0.0
hr_potpetica it_scarpa N 0.38
hr_kukuruz it_cibo N 5.75
it_frittella hr_vafl N 0.25
hr_otac it_madre N 0.0
it_veicolo hr_motocikl N 0.0
it_fegato hr_srce N 0.0
hr_kliziti it_galleggiare V 0.75
hr_užina it_cibo N 4.5
it_sud hr_smjer N 6.0
hr_značenje it_liberta' N 0.0
hr_otići it_arrivare V 0.38
it_costola hr_životinja N 0.0
hr_okidač it_pistola N 0.0
it_bicicletta hr_vozilo N 6.0
it_orecchino hr_nakit N 5.88
hr_čovjek it_donna N 0.0
it_trota hr_riba N 6.0
hr_izvoditi it_cantare V 0.63
it_tecnica hr_znanje N 3.25
hr_uspon it_discesa N 0.0
it_colpa hr_osjećaj N 6.0
it_camicia hr_mikroskop N 0.0
hr_novak it_principiante N 5.25
it_difesa hr_napad N 0.13
hr_pretpostaviti it_supporre V 5.5
it_gelosia hr_osjećaj N 6.0
hr_tamnica it_cella N 3.75
hr_dupin it_mammifero N 6.0
hr_novčanik it_portafoglio N 5.88
it_guscio hr_kornjača N 0.0
hr_tkivo it_ponte N 0.0
it_calcolatrice hr_računalo N 4.0
hr_kaciga it_protezione N 6.0
