# Supplementary material
Source: ML conference proceedings conference paper supplement (https://aclanthology.org/P19-1490)
Supplement: Supplementary [file P19-1490.Supplementary.zip › Guidelines/DE-HyperLex-Guidelines.pdf]

## 1. EINLEITUNG

Die Aufgabe ist den Grad zu annotieren, mit dem zwei Ausdrücke in einer „**Typ von**“ („type of“) Beziehung stehen. Beispielsweise sind die Begriffe TAUBE, KRÄHE, ADLER und SEEMÖVE alle **Typen von** VOGEL, der ihnen gegenüber einen generelleren/ weitergefassten Begriff darstellt und wiederum **Typ von** TIER, einem noch weiter gefassten Begriff, ist. Hierbei ist TAUBE also **Typ von** VOGEL und VOGEL ist **Typ von** TIER, aber auch TAUBE ist **Typ von** TIER.

Manche Worte stehen in einer **Typ von**-Beziehung zueinander, aber zu einem geringeren Grad, als andere Worte. Hier ist ein Beispiel:

Ist FUSSBALL ein **Typ von** SPORT?

Ist SCHACH ein **Typ von** SPORT?

Ist ROSE ein **Typ von** SPORT?

Wahrscheinlich würde jeder darin übereinstimmen, dass FUSSBALL ein **Typ von** SPORT ist und genauso, dass ROSE **kein** **Typ** von SPORT ist. SCHACH wäre irgendwo in der Mitte – weniger ein **Typ von** SPORT als FUSSBALL, aber mehr als ROSE.

Ihre Aufgabe ist es, Wortpaare (Substantive und Verben) zu vergleichen und zu bewerten, wie stark ihre **Typ von** Beziehung auf einer siebenstufigen Skala von 0 (es gibt keine **Typ von**-Beziehung) bis 6 (es gibt eine starke/ sehr klare **Typ von**-Beziehung) ist. Sie sollen also mit einer numerischen Antwort (mit einer Punktzahl von 0 bis 6 (einschließlich)) Fragen der nachfolgenden Art beantworten:

Zu welchem Grad ist TAUBE ein Typ von VOGEL? (Zu welchem Grad ist eine TAUBE ein VOGEL?)

Zu welchem Grad ist VOGEL ein Typ von TIER? (Zu welchem Grad ist ein VOGEL ein TIER?)

Zu welchem Grad ist SCHACH ein Typ von SPORT? (Zu welchem Grad ist SCHACH ein SPORT?)

Zu welchem Grad ist LÖWE ein Typ von SPORT? (Zu welchem Grad ist ein LÖWE ein SPORT?)

## 2. VERBUNDENE WÖRTER

Nur, weil zwei Wörter verbunden sind, d.h. eine Beziehung zwischen ihnen existiert, heißt das nicht, dass diese in einer **Typ von**-Beziehung zueinander stehen. Die nachfolgende Wortpaare scheinen keine **Typ von**-Beziehung aufzuweisen, aber es gibt deutlich eine Beziehung zwischen den Wörtern.

Zu welchem Grad ist REIFEN ein Typ von AUTO? (Zu welchem Grad ist ein REIFEN ein AUTO?)

Zu welchem Grad ist UFER ein Typ von MEER? (Zu welchem Grad ist ein UFER ein MEER?)

Zu welchem Grad ist PFLANZE ein Typ von TIER? (Zu welchem Grad ist eine PFLANZE ein TIER?)

Zu welchem Grad ist WEISS ein Typ von SCHWARZ? (Zu welchem Grad ist WEISS SCHWARZ?)

Zu welchem Grad ist ENKELSOHN ein Typ von ENKELTOCHTER? (Zu welchem Grad ist ein ENKELSOHN eine ENKELTOCHTER?)

## 3. VERBEN

Die **Typ von**-Beziehung ist nicht auf Substantive beschränkt: Sie kann auch auf Verben zutreffen. Die typische Frage für Verben lautet ein wenig anders:

Zu welchem Grad ist STARREN ein Typ von SCHAUEN? (äquivalent: Zu welchem Grad ist STARREN SCHAUEN?)

Zu welchem Grad ist RENNEN ein Typ von SICH BEWEGEN?

#### 4. WORTE MIT MEHREREN BEDEUTUNGEN

Manche Worte können mehrere Bedeutungen haben, welche in der Anzahl der möglichen **Typ von**-Beziehungen reflektiert wird. Zum Beispiel:

Zu welchem Grad ist BANK ein Typ von INSTITUTION?

Zu welchem Grad ist BANK ein Typ von MÖBELSTÜCK?

Zu welchem Grad ist ROCK ein Typ von KLEIDUNG?

Zu welchem Grad ist ROCK ein Typ von MUSIK?

#### 5. REIHENFOLGE IST WICHTIG

Beachten Sie, dass die Reihenfolge der Wörter in der **Typ von**-Beziehung wichtig ist. Für die meisten Menschen gilt:

AUTO ist ein Typ von FAHRZEUG

**aber**

FAHRZEUG ist **kein** Typ von AUTO

#### 6. ABSCHLIESSENDE BEMERKUNGEN

Dinge, die ähnlich oder verbunden sind, stehen nicht notwendiger Weise in einer **Typ von**-Beziehung.

Es gibt nicht notwendigerweise eine vollständig korrekte Antwort zu diesen Fragen. Es ist vollkommen in Ordnung, wenn Sie Ihre Intuition oder Ihr Bauchgefühl als Muttersprachler benutzen, insbesondere wenn Sie nach Wortpaaren gefragt werden, die unverbunden, komisch oder einfach schwierig zu bewerten sind.

Wann auch immer Zweifel aufkommen, versuchen Sie in **Typ von**-Fragen zu denken!
