# Supplementary material
Source: ML conference proceedings conference paper supplement (https://aclanthology.org/P19-1490)
Supplement: Supplementary [file P19-1490.Supplementary.zip › Guidelines/HR-HyperLex-Guidelines.pdf]

## 1. UVOD

Zadatak ovog označavanja je odgovoriti na pitanje „u kojoj mjeri je X vrsta od Y“ (ili, kraće, „u kojoj mjeri je X Y?“) za dani par riječi/koncepta X i Y.

Na primjer, koncepti GOLUB, SVRAKA, ORAO i GALEB „**jesu vrsta**“ koncepta „PTICA“, a koncept PTICA „**je vrsta**“ koncepta ŽIVOTINJA (Primjetite da je isto tako i GOLUB vrsta ŽIVOTINJE).

Nisu svi koncepti X i Y koji su u relaciji „X je vrsta Y“ jednako snažno u toj relaciji. Neki parovi riječi mogu biti u „**je vrsta**“ (odnosno „X je Y“) relaciji izraženije (ili snažnije) nego neki drugi parovi riječi. Na primjer:

Je li NOGOMET vrsta SPORTA? (Je li NOGOMET SPORT?)

Je li ŠAH vrsta SPORTA? (Je li ŠAH SPORT?)

Je li RUŽA vrsta SPORTA? (Je li RUŽA SPORT?)

Vjerojatno bi se većina ljudi složila da NOGOMET jest SPORT. Isto tako većina bi se ljudi složila da RUŽA nije SPORT. ŠAH bi bio negdje između – većina ljudi bi se vjerojatno složila da je ŠAH manje SPORT od NOGOMETA, a više SPORT od RUŽE.

Vaš zadatak je analizirati parove riječi (postoje parovi imenica i parovi glagola) te za svaki par riječi X, Y utvrdite mjeru u kojeg **je prva riječ X vrsta druge riječi Y** (odnosno mjeru u kojoj **X jest Y**). Paru riječi trebate dodijeliti jednu od sedam ocjena: od **0** (uopće ne vrijedi da je X vrsta Y) do **6** (potpuno vrijedi da je X vrsta Y).

Dakle, trebate **numerički, ocjenom između 0 i 6 (uključivo)** odgovoriti na pitanja tipa:

U kojoj mjeri je GOLUB vrsta PTICE? (U kojoj mjeri je GOLUB PTICA?)

U kojoj mjeri je PTICA vrsta ŽIVOTINJE? (U kojoj mjeri je PTICA ŽIVOTINJA?)

U kojoj mjeri je ŠAH vrsta SPORTA? (U kojoj mjeri je ŠAH SPORT?)

U kojoj mjeri je CRVČAK vrsta SPORTA? (U kojoj mjeri je CVRČAK SPORT?)

## 2. POVEZANE RIJEČI

Dvije riječi mogu biti značenjski povezane i ako **NISU** u „**je vrsta**“ relaciji. Samo zato što su dvije riječi značenjski povezane, ne znači da su nužno u relaciji „**je vrsta**“. Sljedeći primjeri pokazuju riječi koje jesu značenjski povezane, ali **nisu** u relaciji „**je vrsta**“:

U kojoj mjeri je KOTAČ vrsta AUTOMOBILA? (U kojoj mjeri je KOTAČ AUTOMOBIL?)

U kojoj mjeri je OBALA vrsta MORA? (U kojoj mjeri je OBALA MORE?)

U kojoj mjeri je BILJKA vrsta ŽIVOTINJE? (U kojoj mjeri je BILJKA ŽIVOTINJA?)

U kojoj mjeri je UNUK vrsta UNUKE? (U kojoj mjeri je UNUK UNUKA?)

U kojoj mjeri je BIJELA vrsta CRNE? (U kojoj mjeri je BIJELA CRNA?)

### **3. GLAGOLI**

Relacija „**je vrsta**“ može postojati ne samo između imenica, već i između glagola. Za parove glagola uobičajeno pitanje izgleda malo drugačije (za pomoć, možemo pretvoriti glagole u glagolske imenice). Na primjer:

U kojoj mjeri je BULJITI vrsta od GLEDATI (ili, ako pretvorimo glagole u glagolske imenice, „U kojoj mjeri je BULJENJE vrsta GLEDANJA?“ „U kojoj mjeri je BULJENJE GLEDANJE?“)

U kojoj mjeri je TRČATI vrsta od KRETATI\_SE (U kojoj mjeri je TRČANJE vrsta KRETANJA? U kojoj mjeri je TRČANJE KRETANJE?)

### **4. RIJEČI S VIŠESTRUKIM ZNAČENJEM**

Neke riječi mogu imati više značenja, zbog čega (u različitim značenjima) mogu biti u „**je vrsta**“ relaciji s različitim konceptima. Na primjer:

U kojoj mjeri je LIST vrsta RIBE? (U kojoj mjeri je LIST RIBA?)

U kojoj mjeri je LIST vrsta MIŠIĆA? (U kojoj mjeri je LIST MIŠIĆ?)

U kojoj mjeri je MIŠ vrsta ŽIVOTINJE? (U kojoj mjeri je MIŠ ŽIVOTINJA?)

U kojoj mjeri je MIŠ vrsta UREĐAJA? (U kojoj mjeri je MIŠ UREĐAJ?)

### **5. REDOSLIJED JE BITAN**

Primijetite kako je redoslijed riječi za koje ocjenjujemo stupanj relacije „**je vrsta**“ bitan. Većina ljudi bi vjerojatno ocijenila da vrijedi

AUTOMOBIL je vrsta VOZILA (AUTOMOBIL je VOZILO),

**ali**

VOZILO **nije** vrsta AUTOMOBILA (VOZILO **nije** AUTOMOBIL)

### **7. ZAVRŠNE NAPOMENE**

Zapamtite, riječi koje su značenjski povezane ili slične, ne moraju nužno biti u relaciji „**je vrsta**“.

Ne postoji nužno točan ili krivi odgovor na ova pitanja (tj. točna ili kriva ocjena *koliko je X vrsta Y*). Koristite svoju intuiciju i osjećaj kao izvornog govornika hrvatskoga jezika, posebno kod parova koji se čine teškima, čudnima ili u kojima se riječi čine nepovezane.

Kad god ste u dilemi, postavite si pitanje „**U kojoj mjeri je X vrsta od Y?**“ (ili „**U kojoj mjeri je X Y?**“).
