# Supplementary material
Source: ML conference proceedings conference paper supplement (https://aclanthology.org/P19-1490)
Supplement: Supplementary [file P19-1490.Supplementary.zip › Guidelines/IT-HyperLex-Guidelines.pdf]

### 1. INTRODUZIONE

L'obiettivo è di annotare il grado in cui due termini si trovino in una relazione di sussunzione („**type of**“). Per esempio, PICCIONE, CORVO, AQUILA e GABBIANO sono tutti **tipi di** un termine più generale, ossia UCCELLO. UCCELLO, a sua volta, è un **tipo di** ANIMALE. Notare che non solo PICCIONE è un **tipo di** UCCELLO e UCCELLO è un **tipo di** ANIMALE, ma anche che PICCIONE è un tipo di ANIMALE.

Alcuni termini sono in una relazione di sussunzione più forte di altri. Ad esempio:

È il CALCIO un tipo di SPORT?  
Sono gli SCACCHI un tipo di SPORT?  
È una ROSA un tipo di SPORT?

Probabilmente tutti sono d'accordo sul fatto che il CALCIO sia uno SPORT, e che una ROSA non sia un tipo di SPORT. Ci si può però aspettare che gli SCACCHI, d'altro canto, si trovino da qualche parte nel mezzo – meno “sportivi” del CALCIO, ma più della ROSA.

In questa task di annotazione dovrete comparare coppie di parole (nomi e verbi) e dare un valore che catturi quanto è forte la relazione di sussunzione tra due termini su una scala di 7 punti dove 0 indica che non esiste alcuna relazione di sussunzione, mentre 7 indica una chiara / la più forte relazione di sussunzione che ci possa essere. Quando assegnate i punteggi tra 0 e 6 cercate di dare un punteggio sulla base delle seguenti domande:

**In quale misura** è un PICCIONE un (tipo di) UCCELLO?  
**In quale misura** è un UCCELLO un (tipo di) ANIMALE?  
**In quale misura** sono gli SCACCHI un (tipo di) SPORT?  
**In quale misura** è un LEONE un (tipo di) SPORT?

### 2. PAROLE E TERMINI CORRELATI

Due parole che sono correlate semanticamente tra di loro non debbono essere necessariamente in una relazione di sussunzione („**type of**“). Negli esempi che seguono le parole sono chiaramente correlate tra di loro, ma non mediante una relazione di sussunzione:

**In quale misura** è un PNEUMATICO un (tipo di) AUTOMOBILE?  
**In quale misura** è un LITORALE un (tipo di) MARE?  
**In quale misura** è una PIANTA un (tipo di) ANIMALE?  
**In quale misura** è il BIANCO un (tipo di) NERO?  
**In quale misura** è un NIPOTE MASCHIO un (tipo di) NIPOTE FEMMINA?

### 3. VERBI

La relazione di sussunzione può sussistere anche tra verbi. La tipica domanda da chiedersi in questi casi è leggermente diversa:

**In quale misura** è FISSARE / GUARDARE FISSO una forma di GUARDARE?  
**In quale misura** è CORRERE una forma di MUOVERSI?

#### 4. PAROLE CON DIVERSI SIGNIFICATI

Alcune parole possono avere diversi significati, come mostrato dalle diverse relazioni di sussunzione che la stessa parola può avere con altre.

**In quale misura** è una GRU un UCCELLO?

**In quale misura** è una GRU una MACCHINA?

**In quale misura** è il SENO una FUNZIONE?

**In quale misura** è il SENO una PARTE ANATOMICA?

In questo caso considera tutti i sensi e seleziona i significati delle parole che stanno in una relazione di sussunzione con il massimo valore.

#### 5. L'ORDINE È IMPORTANTE

Notare che nel caso della relazione di sussunzione l'ordine delle parole è importante (almeno per la maggior parte delle persone):

Un AUTO è un tipo di VEICOLO

**MA**

Un VEICOLO non è un tipo di AUTO

Fate quindi attenzione all'ordine della coppia di termini.

#### 7. ALTRI PUNTI IMPORTANTI

Ricordatevi che cose simili o correlate non sono necessariamente in una relazione di sussunzione!

In generale, non esiste una soluzione 'corretta' a questa task di annotazione: affidatevi alle vostre intuizioni come parlanti madrelingua dell'italiano, specialmente nel caso vi troviate a dover giudicare coppie difficile o strane, o semplicemente nel caso in cui sia difficile decidere per un certo punto punteggio.

Usate le domande sopra nel caso in cui non riusciate a decidervi sulla relazione e il suo grado di intensità!
