# Supplementary material
Source: ML conference proceedings conference paper supplement (https://aclanthology.org/P19-1490)
Supplement: Supplementary [file P19-1490.Supplementary.zip › ungraded-le/ar-en/test-cohyp.txt]

استقالة	feeling	1
كوخ	building	1
منطق	science	1
حليب	beverage	1
الزرق	disease	1
فراشة	creature	1
سترة	garment	1
وحدة	feeling	1
هاتف	system	1
فنان	person	1
غراب	creature	1
المنشطات	drug	1
حقيبة	object	1
بائع	worker	1
سياج	barrier	1
حافلة	vehicle	1
الحج	journey	1
الحرارة	energy	1
سرقة	felony	1
سلوك	action	1
تلعب	show	1
اجنبي	person	1
الثقة	trait	1
الكاردينال	bird	1
موا	bird	1
عزم	trait	1
غراب	bird	1
مستشفى	institution	1
سترة	covering	1
التكنولوجيا	science	1
مدفع	armament	1
قرع	flora	1
حرب	attack	1
علاج	care	1
بقرة	beast	1
قرض	assistance	1
ميليسا	herb	1
الفندق	building	1
سناتور	politician	1
نشوة	emotion	1
سترة	clothing	1
فراشة	animal	1
خزان	vehicle	1
تصور	representation	1
حرب	confrontation	1
صقر	bird	1
سخط	feeling	1
الجغرافية	science	1
سلعة	goods	1
هليكوبتر	transport	1
كلب	fauna	1
مجلس	organization	1
حكم	order	1
راكب	traveler	1
بحار	worker	1
حصان	creature	1
العاطفية	trait	1
حانة	building	1
حب	feeling	1
رداء	clothes	1
نهر	waterfall	1
حرب	conflict	1
حوت	creature	1
حب	feeling	1
مروج	advertiser	1
فرقاطة	craft	1
عشاء	meal	1
نمر	beast	1
عربة	vehicle	1
الحليب	drink	1
الزوج	relative	1
صافرة	instrument	1
ثكنة	building	1
دقيق	food	1
رجل	ankle	1
فرن	commodity	1
الجسم	arm	1
ندوة	gathering	1
رغبة	feeling	1
مدينة	place	1
مذبحة	murder	1
التفاح	fruit	1
مسرح	building	1
نسر	animal	1
تاجر	merchant	1
المفتاح	device	1
حفيد	offspring	1
حربة	weapon	1
عباءة	covering	1
محامي	professional	1
روبن	bird	1
ميليشيا	organization	1
المسرح	building	1
فرقاطة	watercraft	1
يتحمل	animal	1
تعليم	occupation	1
خنجر	weapon	1
شركة	institution	1
الشاي	drink	1
حكومة	minister	1
فيل	beast	1
شفقة	emotion	1
قميص	clothing	1
الحزن	emotion	1
شبت	herb	1
ثور	beast	1
تعاسة	state	1
حصان	beast	1
مطران	priest	1
غواصة	ship	1
بلاطة	tree	1
سيدة	adult	1
كتيب	publication	1
المهاجر	traveler	1
عليق	fruit	1
العسل	food	1
مسكن	drug	1
جيب	container	1
فندق	house	1
الفلك	science	1
توق	feeling	1
بوصلة	instrument	1
البطاطس	food	1
الحدود	boundary	1
دراجة	saddle	1
غاز	goods	1
قميص	object	1
ملكية	king	1
عين	eyelid	1
عربة	vehicle	1
الجسم	leg	1
البيانو	instrument	1
شاحنة	vehicle	1
سترة	clothes	1
فستان	garment	1
قاتل	criminal	1
ثلاجة	appliance	1
شك	emotion	1
قنبلة	weapon	1
سرقة	crime	1
حرب	battle	1
كاتدرائية	building	1
صاروخ	weapon	1
مدينة	port	1
عرش	chair	1
عصير	drink	1
عباءة	object	1
درع	clothing	1
جيش	organization	1
خوف	emotion	1
مشمش	food	1
منزل	library	1
حرب	violence	1
بندقية	object	1
بقرة	cattle	1
رئيس	chief	1
ثلاجة	commodity	1
تنورة	clothing	1
ثعلب	creature	1
المهرب	criminal	1
فستان	clothes	1
الخمور	beverage	1
قطار	transport	1
القهوة	drink	1
منزل	balcony	1
حرب	fight	1
قفص	enclosure	1
حكم	judgement	1
جدال	disagreement	1
بندقية	device	1
شهادة	document	1
قبعة	object	1
موز	fruit	1
راتب	payment	1
صوت	sound	1
المتعة	feeling	1
كيس	container	1
جنازة	ceremony	1
حانة	building	1
الذكورة	trait	1
قرصنة	crime	1
ثلاجة	object	1
صبر	trait	1
مدينة	port	1
الحصبة	illness	1
دولفين	cetacean	1
موسوعة	book	1
مدفع	device	1
مشرع	politician	1
نسر	creature	1
نزل	hotel	1
ازمة	situation	1
الباندا	animal	1
مصلح	person	1
مخدر	drug	1
قبعة	apparel	1
شخصية	personality	1
مينا	bird	1
قهوة	food	1
حرب	tension	1
مدفع	object	1
الرسام	artist	1
مقبرة	site	1
النادي	organization	1
التلفاز	picture	1
الفارق	discrepancy	1
هاتف	device	1
حبال	weapon	1
غراب	animal	1
مطران	clergyman	1
قتال	war	1
تنورة	garment	1
لحم	food	1
هاتف	object	1
رداء	object	1
وجه	jaw	1
حرب	conflict	1
الاعصار	storm	1
الغرور	trait	1
صاروخ	weapon	1
حنين	feeling	1
الزيتون	tree	1
كوخ	building	1
رداء	garment	1
خطف	crime	1
بريد	message	1
معطف	clothing	1
جبن	food	1
منزل	roof	1
التعاطف	emotion	1
خجل	feeling	1
شعار	symbol	1
تؤثر	feeling	1
المساهم	investor	1
التدرج	bird	1
سليل	relative	1
صاروخ	object	1
فخر	feeling	1
مادة	atom	1
استياء	emotion	1
الكنيسة	building	1
غراب	bird	1
مومياء	ancestor	1
ثور	animal	1
مسدس	object	1
عاطفة	feeling	1
رغبة	feeling	1
علم	experiment	1
مسجد	building	1
حرب	strife	1
مخدر	drug	1
شجرة	wood	1
حمالة	clothing	1
الغزال	animal	1
استطلاع	document	1
فخر	emotion	1
طائر	animal	1
سكين	weapon	1
التلفاز	commodity	1
نفي	statement	1
السداد	compensation	1
سترة	good	1
رئيس	representative	1
قنبلة	weapon	1
كرسي	object	1
مرارة	feeling	1
النادي	building	1
جرة	container	1
قميص	clothing	1
تنورة	clothing	1
توقع	feeling	1
معبد	building	1
حرب	struggle	1
سكن	building	1
حمار	animal	1
التمثيل	statement	1
غضب	emotion	1
جزار	merchant	1
بضائع	material	1
قط	animal	1
اعصار	storm	1
ثوب	clothing	1
خبير	person	1
ممر	road	1
كتيب	book	1
رئيس	leader	1
عاصفة	phenomenon	1
روبن	animal	1
ثعلب	canine	1
فيلا	habitation	1
عداء	feeling	1
شوكة	object	1
مصور	artist	1
رجل	thigh	1
ذهول	feeling	1
مدفعي	serviceman	1
مستشفى	building	1
بلوط	tree	1
حكومة	group	1
مذكرة	document	1
الحجم	height	1
الرائدة	representative	1
سر	information	1
الاعصار	phenomenon	1
محرر	worker	1
مرارة	emotion	1
نشوة	emotion	1
كاتدرائية	church	1
قاموس	book	1
الجيش	organization	1
الرحم	organ	1
شوق	feeling	1
باب	lock	1
دير	house	1
الساق	foot	1
لامبالاة	feeling	1
الدجاجة	bird	1
كمان	object	1
سيارة	window	1
منزل	building	1
المرونة	trait	1
معطف	apparel	1
القش	herb	1
لحية	hair	1
سعادة	feeling	1
ابنة	offspring	1
رداء	clothing	1
المتعة	emotion	1
ملابس	pocket	1
الضحك	emotion	1
الحب	emotion	1
منطق	discipline	1
الصواريخ	vehicle	1
غيظ	emotion	1
حرب	crackdown	1
عاء	container	1
تسونامي	wave	1
فيل	animal	1
الطريق	road	1
هاتف	equipment	1
شاحنة	transport	1
كوخ	dwelling	1
الكراهية	emotion	1
حمار	beast	1
يتحمل	beast	1
مدينة	resort	1
قميص	clothes	1
سيارة	transport	1
موظف	worker	1
نحلة	animal	1
مرصد	building	1
صاروخ	weapon	1
ولاية	district	1
سيارة	goods	1
هاون	weapon	1
مسدس	weapon	1
المنتج	goods	1
جناح	building	1
صفقة	agreement	1
تعاطف	feeling	1
حفيدة	offspring	1
هليكوبتر	vehicle	1
حماس	feeling	1
فرقاطة	ship	1
التعاطف	feeling	1
سكين	weapon	1
نقاش	communication	1
استيراد	commerce	1
مدفع	weapon	1
مهاجر	migrant	1
حمامة	creature	1
الليمون	fruit	1
صاروخ	arm	1
عليق	berry	1
قبعة	clothes	1
بوابة	entrance	1
النجار	worker	1
هاتف	commodity	1
المياه	substance	1
هلع	fear	1
الصنوبر	tree	1
تفاحة	fruit	1
رغبة	feeling	1
جامع	building	1
دولفين	creature	1
دولفين	animal	1
مكتبة	building	1
قاطرة	vehicle	1
قهوة	liquid	1
الحجاب	garment	1
بقرة	creature	1
قمح	food	1
كنيسة	altar	1
منزل	building	1
قميص	apparel	1
سفير	diplomat	1
صاروخ	device	1
رادار	instrument	1
ارتياح	feeling	1
الفندق	building	1
فستان	covering	1
صالة	passageway	1
صقر	creature	1
الزيتون	fruit	1
عباءة	clothing	1
شجاعة	emotion	1
بلوط	plant	1
شقيق	kinsman	1
شعار	saying	1
اسم	word	1
باس	instrument	1
ثعلب	animal	1
طريق	intersection	1
الشرطة	gun	1
قهوة	beverage	1
هندسة	occupation	1
قبعة	covering	1
فيلا	dwelling	1
طيار	worker	1
قبعة	accessory	1
معطف	garment	1
الذعر	emotion	1
سيارة	conveyance	1
حافلة	transport	1
فيلا	site	1
زعرور	tree	1
قنبلة	device	1
مدرس	professional	1
نشوة	feeling	1
قميص	covering	1
الزعتر	herb	1
قبعة	clothing	1
نمر	animal	1
بيانو	instrument	1
مدينة	area	1
نمر	creature	1
الرياضيات	science	1
راقصة	entertainer	1
معركة	attack	1
عسل	food	1
المحقق	policeman	1
دير	dwelling	1
معطف	clothes	1
قاض	official	1
القوس	weapon	1
بلدية	district	1
العاني	bird	1
شركة	organization	1
النادي	building	1
فيلا	house	1
المحاصيل	flora	1
حرفي	professional	1
شاعر	writer	1
كمان	device	1
عهد	document	1
مدرسة	building	1
نسيم	wind	1
غضب	emotion	1
وجه	beard	1
خنجر	weapon	1
مسدس	weapon	1
محارب	liver	0
بالغ	transsexual	0
زجاجة	bottle	0
سوق	puncture	0
جوال	compulsive	0
قريب	thrower	0
اجراء	negotiation	0
امير	slave	0
جائزة	dowry	0
رسالة	display	0
قرن	life	0
محارب	elizabethan	0
كاتب	dispatcher	0
تفرقة	occupation	0
حزمة	library	0
جزاء	occupation	0
جار	captor	0
جامع	synagogue	0
ساكن	reliever	0
جار	quarter	0
ساكن	beard	0
عالم	tyrant	0
استخلاص	diffusion	0
جار	waiter	0
سلة	cassette	0
بنزين	dioxin	0
امير	sphinx	0
مصنع	mint	0
امير	follower	0
فترة	bout	0
هجرة	translation	0
امير	transvestite	0
ايضاح	formula	0
خبير	engineer	0
اجتماع	congregation	0
استمرار	turn	0
الامن	patrol	0
ترحال	maneuver	0
دقيق	ingredient	0
جامع	masjid	0
جزء	end	0
اقتناع	philosophy	0
سلة	mailer	0
ناس	swarm	0
جزء	frame	0
ازمة	crunch	0
محارب	shaker	0
خلاصة	injection	0
عالم	reliever	0
صحافي	cyberpunk	0
تعليق	announcement	0
ساكن	cancer	0
جارية	volunteer	0
قدرة	uncertainty	0
تعويض	counterbalance	0
بالغ	unfortunate	0
جزاء	demobilization	0
مجلس	intelligence	0
اقتراح	submission	0
اقتراع	casting	0
بطالة	revocation	0
حب	pleasure	0
خبير	jumper	0
نجاح	sound	0
اتحاد	defense	0
سلة	dumpster	0
ادعاء	receivership	0
عاهل	pharaoh	0
تاثير	flick	0
قريب	admirer	0
اتحاد	hierarchy	0
حامض	formulation	0
بضاعة	track	0
عالم	capricorn	0
خبير	blond	0
بالغ	right-hander	0
محارب	seeker	0
محارب	native	0
اتحاد	gang	0
فندق	temple	0
مسؤول	aviator	0
حزمة	collage	0
اعداد	role	0
اقتراح	information	0
الصناعي	baron	0
عالم	advocate	0
اجتماع	kin	0
تقنية	architecture	0
توقع	individualism	0
نجاح	thing	0
استمرار	works	0
قصف	blitz	0
جوال	lover	0
محامي	virgo	0
جار	buster	0
بضاعة	sphere	0
مسؤول	baker	0
فترة	mid-august	0
سائل	substrate	0
مباراة	chicken	0
قرن	times	0
سوق	burst	0
غلة	meat	0
تصور	generalization	0
التماس	promotion	0
جار	adventurer	0
جار	married	0
رغبة	emotion	0
محامي	nonpartisan	0
الهوة	play	0
قرن	mid-june	0
محارب	left-hander	0
جار	white	0
خبير	scientist	0
حساب	quota	0
تجمع	huddle	0
موضوع	approval	0
ساكن	face	0
استخدام	receivership	0
عربة	trailer	0
تملك	opposition	0
تعاسة	passion	0
اعداد	laughter	0
برج	shelter	0
اتصال	implementation	0
محافظ	character	0
مصفاة	distillery	0
محامي	pursuer	0
شجار	war	0
محارب	authority	0
عون	puncture	0
فندق	resort	0
قمح	rice	0
قريب	left-hander	0
فندق	library	0
جار	actor	0
شعار	recording	0
امير	shaker	0
محامي	mouse	0
تفاح	banana	0
امير	face	0
تفرقة	mobilization	0
بيانات	repertory	0
توقع	fetishism	0
ظرف	atmosphere	0
قاضي	official	0
ناس	community	0
ساكن	communicator	0
شراب	medium	0
جار	convert	0
موضوع	memorial	0
محارب	taurus	0
حب	pride	0
جار	nude	0
تفرقة	appeasement	0
سوق	waste	0
استخدام	medium	0
بالغ	collector	0
خلق	kickoff	0
ساكن	gambler	0
قماش	paving	0
هجرة	haste	0
برج	vaulting	0
اسلاف	sibling	0
تنافس	separation	0
علم	engineering	0
اثاث	appointment	0
مكان	charm	0
خلق	activation	0
محامي	cancer	0
جار	applicant	0
اصلاح	perfection	0
قريب	mailer	0
قريب	individualist	0
انتفاضة	feud	0
توقع	thought	0
ناس	race	0
تجربة	follow-up	0
ظرف	mechanization	0
مكان	hoodoo	0
قريب	occultist	0
بالغ	lover	0
قريب	transvestite	0
اجراء	role	0
بلدية	conurbation	0
خبير	reliever	0
محاسب	entrepreneur	0
استخدام	utilization	0
القريب	kin	0
سخط	hate	0
متفجر	reactant	0
بالغ	scientist	0
رئيس	quarter	0
جرة	poacher	0
قرن	time	0
استخدام	status	0
عالم	ruler	0
فترة	generation	0
محارب	sport	0
عقلية	position	0
خبير	signer	0
محارب	explorer	0
بالغ	contemplative	0
بضاعة	antiquity	0
ساكن	rusher	0
سوق	acting	0
تعليق	proposition	0
جوال	anti-american	0
رئيس	individualist	0
صلة	comparison	0
عصر	youth	0
جبل	highland	0
عون	calibration	0
قرن	school	0
رئيس	dresser	0
محارب	chameleon	0
توقع	doctrine	0
حامض	carbonyl	0
اقتراع	coloration	0
حزمة	law	0
زجاجة	well	0
رقص	antic	0
قدرة	attraction	0
رئيس	turner	0
رغبة	hope	0
تجهيزات	furnishing	0
مقارنة	search	0
بعد	degree	0
امير	advocate	0
اجحاف	tilt	0
خيال	migrant	0
محارب	signer	0
قريب	passer	0
جار	redhead	0
ادخار	transgression	0
قدرة	excellence	0
مقاطعة	papua	0
امير	picker	0
جريمة	treason	0
جزء	turn	0
تقارب	boom	0
فترة	dawn	0
مطبوعة	handicraft	0
عالم	copycat	0
رئيس	gentile	0
سيدة	nymph	0
استوديو	colliery	0
تخطيط	groundwork	0
قرن	watch	0
طعام	ferment	0
بالغ	rescuer	0
قريب	african	0
جار	male	0
ادارة	occupation	0
ادخار	beatification	0
ساكن	gentile	0
خلق	springboard	0
سوق	precession	0
ثور	beef	0
قريب	witness	0
عازف	actor	0
فندق	hall	0
ساكن	captor	0
بالغ	linguist	0
محامي	explorer	0
جارية	finisher	0
ادعاء	procedure	0
بالغ	capitalist	0
احتياطي	infantryman	0
غارة	breakthrough	0
محارب	capitalist	0
التماس	shocker	0
اعداد	game	0
خبير	copycat	0
ساكن	hope	0
يخت	boat	0
بالغ	ethnic	0
اطلاق	smooth	0
محامي	victim	0
مكان	neighbor	0
مطعم	observatory	0
محامي	quarter	0
مسؤول	editor	0
دودة	arthropod	0
تملك	position	0
عون	negotiation	0
اجر	annuity	0
ساكن	applicant	0
بالغ	innocent	0
ادعاء	appeal	0
بطالة	wild	0
موضوع	promotion	0
جوال	nude	0
طاقم	den	0
تعامل	stampede	0
ايضاح	falsehood	0
بضاعة	covering	0
عالم	cripple	0
حبر	water	0
سوق	protection	0
اعداد	negotiation	0
محامي	realist	0
جار	beard	0
حزمة	herbarium	0
ازالة	divergence	0
جائزة	present	0
زيادة	run	0
ساكن	female	0
امير	agnostic	0
سيدة	matriarch	0
خلف	cousin	0
بطالة	ownership	0
اجراء	ceremony	0
امدادات	reserve	0
سوق	pleasure	0
استوديو	workshop	0
امير	occultist	0
رئيس	closer	0
قماش	square	0
جدول	faq	0
رقص	fun	0
امير	amateur	0
مقاطعة	radius	0
موضوع	refusal	0
شراء	assumption	0
بناية	masonry	0
اقتراح	introduction	0
رئيس	traveler	0
فترة	overtime	0
حب	despair	0
مسؤول	engraver	0
ورقة	gill	0
مشاركة	integration	0
سخط	anxiety	0
عالم	innocent	0
عالم	passer	0
رئيس	female	0
محامي	neighbor	0
امير	beard	0
اجراء	practice	0
اقتراح	offer	0
جدال	conference	0
حساب	constant	0
جوال	virgo	0
حزمة	ensemble	0
اقليم	county	0
حزمة	class	0
قريب	right-hander	0
سمة	space	0
محامي	white	0
تعامل	vote	0
اكسيد	hydroxide	0
اجراء	support	0
اكسيد	complex	0
محامي	amerindian	0
جوال	longer	0
مكتب	stand	0
رئيس	jumper	0
بالغ	ward	0
اجراء	attempt	0
جارية	carter	0
بطالة	obligation	0
شكل	rubric	0
دواء	nursing	0
مدفع	launcher	0
داء	growth	0
امير	traveler	0
خبير	ancient	0
قتال	foray	0
اتهام	allegation	0
غلة	seafood	0
رئيس	rectifier	0
محارب	homunculus	0
احتساب	rule	0
جامع	bethel	0
بيانات	europe	0
خبير	blogger	0
عالم	adult	0
محامي	buster	0
تفاح	kiwi	0
محامي	case	0
الب	caste	0
خلف	ancestor	0
بناية	projection	0
عالم	mestizo	0
مشاركة	cooperation	0
الغيب	miracle	0
جوال	radical	0
قريب	white	0
محامي	optimist	0
سلة	canister	0
برج	transept	0
سلة	receptacle	0
وجبة	vitamin	0
سوق	sin	0
قتل	abortion	0
محامي	changer	0
قدرة	elegance	0
مشاركة	legalization	0
حوار	argument	0
دعوة	call	0
بيانات	wardrobe	0
شراب	feed	0
نجاح	crash	0
بضاعة	decoration	0
محامي	picker	0
وجدان	thing	0
حقيبة	envelope	0
ساعة	half-hour	0
مالية	fishing	0
اجراء	organization	0
ساكن	cripple	0
فترة	hour	0
قميص	swimsuit	0
استوديو	exchange	0
قماش	opening	0
مرصد	tavern	0
قس	shepherd	0
بلدة	city	0
قريب	self	0
مشاركة	rally	0
قس	preacher	0
تجربة	role	0
محارب	nude	0
بالغ	chameleon	0
شركة	partnership	0
تفاح	quince	0
قتل	liquidation	0
سكر	syrup	0
اقتراح	motion	0
بالغ	inhabitant	0
حب	humility	0
ابتلاع	respiration	0
جزيرة	isthmus	0
رئيس	peer	0
باز	eagle	0
التماس	acknowledgment	0
مكتب	counter	0
ساكن	engineer	0
زجاجة	retort	0
جوال	blond	0
تعاسة	affection	0
رئيس	commander	0
بطالة	employment	0
عبارة	ark	0
مورد	investment	0
امير	dancer	0
د	usher	0
سيد	womanizer	0
بالغ	mestizo	0
بطالة	receivership	0
امير	entertainer	0
قماش	weight	0
خزانة	cabinet	0
جوال	individualist	0
ارتقاء	degeneration	0
محارب	literate	0
حامض	stripper	0
اتمام	interaction	0
حساب	integer	0
عالم	waiter	0
