# Supplementary material
Source: ML conference proceedings conference paper supplement (https://aclanthology.org/P19-1490)
Supplement: Supplementary [file P19-1490.Supplementary.zip › ungraded-le/ar-en/test-hypo.txt]

كوخ	building	1
منطق	science	1
فراشة	creature	1
مدخل	passageway	1
الحيوانات	wool	1
وحدة	feeling	1
القوس	instrument	1
فنان	person	1
جواهر	adornment	1
فندق	building	1
بائع	worker	1
سياج	barrier	1
حافلة	vehicle	1
خنجر	object	1
سترة	clothing	1
تلعب	show	1
تواضع	trait	1
اجنبي	person	1
الثقة	trait	1
الكاردينال	bird	1
خيار	food	1
قطار	vehicle	1
جاذبية	phenomenon	1
سيلفيا	bird	1
حليب	food	1
مؤتمر	meeting	1
مستشفى	institution	1
التكنولوجيا	science	1
دبلوماسي	worker	1
يخت	watercraft	1
علاج	care	1
مصور	artist	1
اللبن	drink	1
قرض	assistance	1
الفندق	building	1
سناتور	politician	1
خنجر	device	1
حقيبة	accessory	1
نشوة	emotion	1
مصنف	publication	1
فستان	apparel	1
معركة	war	1
فراشة	animal	1
معطف	clothing	1
سخط	feeling	1
الجغرافية	science	1
كوخ	habitation	1
يخت	boat	1
كاهن	clergyman	1
سلعة	goods	1
هليكوبتر	transport	1
ضمير	word	1
حكم	order	1
الصفة	word	1
العشب	flora	1
قاطرة	vehicle	1
حليب	liquid	1
معطف	goods	1
تابوت	container	1
رداء	clothes	1
شاحنة	conveyance	1
التلفاز	appliance	1
نهر	waterfall	1
حرب	conflict	1
بضائع	commodity	1
حوت	creature	1
الرياضيات	science	1
حب	feeling	1
مروج	advertiser	1
فرقاطة	craft	1
الحليب	drink	1
رجل	ankle	1
كعكة	food	1
الجسم	arm	1
ندوة	gathering	1
صنوبر	tree	1
رغبة	feeling	1
هولي	tree	1
ائتمان	loan	1
التفاح	fruit	1
قنبلة	weapon	1
المفتاح	device	1
حفيد	offspring	1
حربة	weapon	1
غضب	feeling	1
عباءة	covering	1
روبن	bird	1
صقر	bird	1
فرقاطة	watercraft	1
يتحمل	animal	1
خنجر	weapon	1
شركة	institution	1
الشاي	drink	1
قلق	emotion	1
قميص	clothing	1
ريحان	herb	1
ثور	beast	1
جبن	food	1
غواصة	ship	1
حكومة	council	1
الخصخصة	process	1
سلة	container	1
التلفاز	equipment	1
انتخاب	vote	1
مسكن	drug	1
جيب	container	1
الجامعة	faculty	1
فندق	house	1
الفلك	science	1
توق	feeling	1
سيارة	vehicle	1
سباحة	sport	1
عباءة	clothing	1
فستان	clothing	1
منارة	building	1
التلفاز	device	1
حمار	creature	1
مشمش	fruit	1
غاز	goods	1
قميص	object	1
عميد	leader	1
ملكية	king	1
عين	eyelid	1
سمفونية	music	1
عربة	vehicle	1
البيانو	instrument	1
هليكوبتر	conveyance	1
السرير	object	1
حقيبة	container	1
سترة	clothes	1
حانة	building	1
صقر	animal	1
قاتل	criminal	1
قنبلة	weapon	1
قمح	flora	1
كيمياء	science	1
حرب	battle	1
مدينة	territory	1
الربو	illness	1
مدينة	port	1
مركبة	wheel	1
النخيل	tree	1
محاضر	adult	1
درع	clothing	1
خوف	emotion	1
حكم	verdict	1
زقاق	thoroughfare	1
مشمش	food	1
سترة	garment	1
منزل	library	1
النفط	substance	1
حرب	violence	1
شاي	beverage	1
حزن	feeling	1
بقرة	cattle	1
ثلاجة	commodity	1
دير	building	1
ثعلب	creature	1
المهرب	criminal	1
فستان	clothes	1
الخمور	beverage	1
قرض	borrowing	1
قطار	transport	1
القهوة	drink	1
حرب	fight	1
قفص	enclosure	1
ابن	offspring	1
زجاجة	container	1
جد	ancestor	1
بندقية	device	1
الرمح	weapon	1
شهادة	document	1
قبعة	object	1
تسرب	opening	1
موز	fruit	1
خبز	flour	1
لاهوت	discipline	1
حزن	feeling	1
كيس	container	1
جنازة	ceremony	1
عداء	athlete	1
التعبيري	artist	1
ثعلب	beast	1
حانة	building	1
الذكورة	trait	1
قرصنة	crime	1
السارق	criminal	1
ثلاجة	object	1
كاهن	leader	1
مستثمر	person	1
مملكة	town	1
ذراع	hand	1
صبر	trait	1
مدينة	port	1
دولفين	cetacean	1
مدفع	device	1
مشرع	politician	1
نسر	creature	1
مدينة	zone	1
فرن	appliance	1
هستيريا	disorder	1
مخدر	drug	1
قبعة	apparel	1
شخصية	personality	1
مينا	bird	1
الغيرة	emotion	1
حرب	tension	1
الرسام	artist	1
الفارق	discrepancy	1
هاتف	device	1
حافلة	conveyance	1
رعب	emotion	1
عباءة	garment	1
الخمور	liquid	1
حبال	weapon	1
غراب	animal	1
لحم	food	1
هاتف	object	1
سترة	commodity	1
حصان	animal	1
مسدس	weapon	1
كوبيه	vehicle	1
صنوبر	plant	1
الاعصار	storm	1
الطبيب	professional	1
فيلم	scene	1
الغرور	trait	1
صاروخ	weapon	1
تذكرة	document	1
الزيتون	tree	1
النحل	fauna	1
عباءة	clothes	1
الوقود	substance	1
بريد	message	1
جبن	food	1
منزل	roof	1
التعاطف	emotion	1
خجل	feeling	1
شعار	symbol	1
تؤثر	feeling	1
المساهم	investor	1
التدرج	bird	1
سليل	relative	1
فخر	feeling	1
مقال	prose	1
التفاؤل	feeling	1
الكنيسة	building	1
الجسم	neck	1
رعب	feeling	1
قمح	goods	1
عام	month	1
مومياء	ancestor	1
علم	experiment	1
حمالة	clothing	1
مدينة	resort	1
استطلاع	document	1
يوم	hour	1
الهوكي	sport	1
قصر	house	1
نفي	statement	1
حكومة	authority	1
الخوف	emotion	1
مطعم	building	1
العاطفة	feeling	1
سترة	good	1
مثابرة	trait	1
مدينة	suburb	1
رئيس	representative	1
قنبلة	weapon	1
كرسي	object	1
مرارة	feeling	1
فستان	object	1
جرة	container	1
الانتفاضة	conflict	1
البيض	food	1
تنورة	clothing	1
معبد	building	1
سكن	building	1
نسر	bird	1
عقاب	bird	1
خائن	criminal	1
التمثيل	statement	1
تخوف	feeling	1
حمامة	bird	1
عشيقة	woman	1
حشرة	animal	1
سترة	object	1
قمح	cereal	1
بضائع	material	1
معطف	object	1
مستشار	leader	1
خبير	person	1
عاصفة	phenomenon	1
موز	food	1
روبن	animal	1
جمعية	federation	1
حمامة	bird	1
فم	lip	1
حكومة	president	1
مصور	artist	1
رخصة	document	1
بناء	window	1
ذهول	feeling	1
مستشفى	building	1
بلوط	tree	1
مذكرة	document	1
الحجم	height	1
حافة	boundary	1
حجاب	garment	1
عاء	object	1
سر	information	1
يخت	vehicle	1
كاتدرائية	building	1
فرقاطة	vehicle	1
قاموس	book	1
سكين	weapon	1
الجيش	organization	1
بقرة	animal	1
حرب	fighting	1
رقص	art	1
لامبالاة	feeling	1
شوكة	ware	1
الدجاجة	bird	1
ندوة	meeting	1
كمان	object	1
ضاحية	district	1
سيارة	window	1
سترة	apparel	1
المصور	artist	1
قميص	commodity	1
سعادة	feeling	1
رداء	clothing	1
المتعة	emotion	1
فيل	creature	1
قنبلة	object	1
غيظ	emotion	1
حرب	crackdown	1
الفرح	emotion	1
قرض	funding	1
ركبة	joint	1
هاتف	equipment	1
وجه	eye	1
كوخ	dwelling	1
الكراهية	emotion	1
قميص	clothes	1
موظف	worker	1
صاروخ	weapon	1
ولاية	district	1
هاون	weapon	1
حشيشة	flora	1
مسدس	weapon	1
مستقرة	building	1
المنتج	goods	1
جناح	building	1
بناء	bathroom	1
خنجر	knife	1
هليكوبتر	vehicle	1
فرقاطة	ship	1
التعاطف	feeling	1
سكين	weapon	1
نقاش	communication	1
استيراد	commerce	1
قبعة	commodity	1
مهاجر	migrant	1
عباءة	apparel	1
مباراة	competition	1
بوابة	entrance	1
هليكوبتر	aircraft	1
هاتف	commodity	1
حليب	food	1
المياه	substance	1
هاتف	appliance	1
الصنوبر	tree	1
دولفين	creature	1
ثور	creature	1
النساء	adult	1
قميص	garment	1
مكتبة	building	1
قهوة	liquid	1
الحجاب	garment	1
بقرة	creature	1
منزل	building	1
كنيسة	organization	1
شغف	feeling	1
عصفور	creature	1
صاروخ	device	1
ارتياح	feeling	1
مستشفى	site	1
فستان	covering	1
فندق	building	1
صالة	passageway	1
خمر	alcohol	1
بندقية	weapon	1
الزيتون	fruit	1
عباءة	clothing	1
مدينة	centre	1
شجاعة	emotion	1
جريدة	column	1
بلوط	plant	1
كمان	instrument	1
شقيق	kinsman	1
قرض	financing	1
شعار	saying	1
ثعلب	animal	1
طريق	intersection	1
قصر	dwelling	1
قهوة	beverage	1
قبعة	covering	1
طيار	worker	1
قبعة	accessory	1
نسر	bird	1
معطف	garment	1
تفاحة	food	1
دراجة	vehicle	1
حافلة	transport	1
فيلا	site	1
زعرور	tree	1
مدرس	professional	1
نشوة	feeling	1
الكلاسيكية	artist	1
قميص	covering	1
يوم	night	1
وجه	mouth	1
بيانو	instrument	1
حسد	feeling	1
نمر	creature	1
رغيف	food	1
الرياضيات	science	1
راقصة	entertainer	1
حبر	liquid	1
حوت	animal	1
عسل	food	1
كوخ	house	1
رداء	garment	1
كيمياء	science	1
دير	dwelling	1
عصابة	organization	1
قميص	garment	1
ارتفاع	dimension	1
المخدرات	substance	1
فراشة	insect	1
العاني	bird	1
حادث	phenomenon	1
الطاولة	object	1
شركة	organization	1
النادي	building	1
المحاصيل	flora	1
مؤسسة	organization	1
حرفي	professional	1
حرب	assault	1
شاعر	writer	1
شراب	liquid	1
التوبة	emotion	1
جندي	serviceman	1
كمان	device	1
عهد	document	1
مدرسة	building	1
غضب	emotion	1
راية	symbol	1
خنجر	weapon	1
قبعة	garment	1
انتشار	differential	0
ذراع	gun	0
شارب	consumer	0
فن	dance	0
سلاح	dirk	0
بيان	suspension	0
جندي	spare	0
مكون	goods	0
فرن	good	0
صرح	library	0
المحترفين	teacher	0
الرجعية	television	0
زعيم	dean	0
مستوى	pollutant	0
هضم	food	0
ملابس	gray	0
الزوج	wife	0
تغذية	science	0
مستوى	base	0
ضاحية	city	0
قتال	war	0
بناء	hospital	0
ملابس	bed	0
حرفة	helicopter	0
شعور	satisfaction	0
رئيس	president	0
الوسط	player	0
صرح	hospital	0
فرض	security	0
علم	education	0
جريدة	feature	0
استيعاب	food	0
عظيم	horse	0
بعد	magnitude	0
رجل	body	0
الاتصالات	discussion	0
حل	pour	0
طائر	summit	0
بيان	quotation	0
ملابس	shirt	0
وحش	bear	0
بناء	stable	0
عشب	melissa	0
طريق	passage	0
حكم	rule	0
مستوى	drink	0
منزل	farm	0
شجرة	palm	0
فرض	war	0
عامل	cooking	0
بناء	villa	0
جهاز	oven	0
نسبة	differential	0
ملابس	storage	0
موضوع	bomb	0
مباراة	contest	0
بناء	mosque	0
التواصل	clerk	0
سمة	emotional	0
نجاح	victory	0
منشور	booklet	0
ممثل	negotiator	0
مرض	cold	0
منافسة	match	0
صرح	cottage	0
موضوع	cloak	0
دراج	bird	0
جهاز	oven	0
حاوية	bottle	0
فاكهة	apricot	0
الدموية	herb	0
بندقية	police	0
عين	solid	0
سائل	old	0
استقرار	substance	0
طائر	crow	0
ملابس	shirt	0
معلومات	head	0
ملابس	jacket	0
ظاهرة	twister	0
تفسير	excuse	0
طعام	goods	0
قمعية	herb	0
قدم	rear	0
طعام	eggs	0
تجارة	financial	0
لون	bird	0
حلق	neck	0
قلم	point	0
اشخاص	person	0
ملابس	cloak	0
اتهام	statement	0
تغطية	coat	0
المصفاة	bird	0
عامل	salesman	0
الذروة	pencil	0
مدينة	kingdom	0
تغطية	cap	0
فنان	expressionist	0
مقاطعة	city	0
البرمجيات	free	0
نزاع	war	0
الفندق	hostel	0
المشاعر	laughter	0
عجلة	vehicle	0
كلمة	noun	0
حذاء	saddle	0
حدود	edge	0
سائل	wine	0
ليل	day	0
نهر	rapid	0
نص	subject	0
طائر	eagle	0
المحترفين	nothing	0
لعب	fauna	0
رجل	football	0
مستوى	stimulate	0
فاكهة	banana	0
ملابس	shirt	0
شعور	passion	0
الذكر	gun	0
معلن	promoter	0
المخدرات	discount	0
مخلوق	falcon	0
طعام	apple	0
رياضي	runner	0
مستوى	dynamite	0
قرض	pay	0
وكيل	leader	0
يحدث	effect	0
متتالية	film	0
نقل	train	0
مركز	city	0
شعور	passion	0
فم	face	0
المواصلات	fighter	0
طلب	call	0
بالغ	lady	0
الفارق	spread	0
المغزى	phenomenon	0
سرج	bicycle	0
مدخل	gate	0
سفينة	barrier	0
عين	face	0
نسبيا	scion	0
قس	bishop	0
طريق	rotary	0
حاوية	pot	0
القرار	rule	0
نزاع	uprising	0
تغير	pal	0
علم	space	0
سلاح	bow	0
هجومي	war	0
شعور	resignation	0
اشخاص	b	0
شجرة	holly	0
مركبة	truck	0
حشرة	moth	0
شجرة	spruce	0
حيوان	bear	0
مساء	day	0
طعام	meat	0
ضابط	president	0
مستوى	fuel	0
كنيسة	meeting	0
بناء	courtyard	0
مكانة	forefront	0
سكن	cottage	0
عداد	boot	0
لعب	match	0
تنفيذ	bomb	0
شعور	runner	0
المعهد	company	0
سمة	crap	0
شعور	shame	0
حكومة	status	0
علم	electronics	0
اقتراح	travel	0
النباتية	love	0
حيوان	fox	0
شعور	longing	0
صرح	cathedral	0
حكم	base	0
شراب	wines	0
عاصفة	twister	0
مخلوق	donkey	0
ملابس	dress	0
هيكل	ship	0
مشترك	knee	0
وكيل	president	0
حكم	rule	0
عجز	deafness	0
كلمة	amendment	0
شعور	sympathy	0
مخلوق	pisces	0
بضائع	truck	0
حكم	suggestion	0
دفع	gift	0
النسل	grandson	0
مركبة	fighter	0
جيد	cap	0
التمويل	debt	0
بضائع	coal	0
جريمة	theft	0
منشور	classified	0
شجرة	slab	0
سكن	monastery	0
عشب	grain	0
نثر	editorial	0
التواصل	clerk	0
نقل	fighter	0
مباراة	competition	0
الندية	flora	0
حرب	fight	0
الفنان	artist	0
المشاعر	anger	0
الفنان	dancer	0
النباتية	plague	0
المشاعر	sympathy	0
مذبح	church	0
مسدس	male	0
تحويل	weakness	0
احتلال	engineering	0
مركبة	airport	0
عمل	medication	0
منظمة	church	0
سفينة	frigate	0
حذاء	throat	0
علم	conference	0
مخلوق	bear	0
شخص	national	0
المشاعر	pride	0
المواصلات	bus	0
توتر	war	0
فيل	pure	0
نسبيا	husband	0
تقدير	statement	0
مخلوق	fox	0
بناء	cage	0
شعور	love	0
جهاز	television	0
سمة	perseverance	0
المنتج	goods	0
ملابس	skirt	0
صراع	war	0
المتلقي	equipment	0
ظاهرة	gravity	0
مسابقة	race	0
مدينة	kingdom	0
طاقة	heat	0
ملابس	separate	0
جناية	theft	0
موزع	container	0
شراب	tea	0
المشاعر	rage	0
قميص	good	0
المشاعر	anger	0
مركبة	coach	0
طعام	assimilation	0
موضوع	key	0
طعام	cheese	0
التدرج	creature	0
مراسم	funeral	0
الجناح	athlete	0
يشرب	tea	0
حب	care	0
سلاح	battery	0
بضائع	materials	0
معالج	privatization	0
المشاعر	hatred	0
مكتبة	house	0
مباراة	competition	0
سباق	match	0
جريمة	kidnapping	0
سلاح	bomb	0
حذاء	language	0
المالك	jenny	0
منطقة	city	0
الادارة	government	0
شراب	milk	0
شخص	expert	0
قاعدة	ruling	0
جفن	eye	0
شعور	trance	0
سمة	excellence	0
المشهد	film	0
زعيم	priest	0
ملابس	coat	0
صلب	apple	0
بناء	distribution	0
مرض	measles	0
سلعة	shirt	0
ماشية	cow	0
يقاتل	war	0
يد	arm	0
طعام	loaf	0
وثيقة	project	0
صلب	cheese	0
مساعدة	debt	0
هدف	design	0
الحيوانات	dog	0
عام	evaluation	0
بناء	pub	0
تنتهي	victory	0
عمل	point	0
حرفة	frigate	0
تسلح	gun	0
حصان	stamp	0
بضائع	product	0
مرض	bitter	0
مباراة	battle	0
اشتباك	war	0
وحش	fox	0
منزل	cottage	0
دوار	flora	0
المشاعر	fear	0
دوار	road	0
طعام	mouth	0
النباتية	wheat	0
حدود	lower	0
موقع	villa	0
شعور	envy	0
شخص	reformer	0
قضيب	organ	0
مخلوق	moth	0
حماقة	trait	0
مجلس	government	0
نسبيا	grandmother	0
تغطية	dress	0
تغطية	cloak	0
دفع	salary	0
حيوان	tiger	0
حاوية	bag	0
جندي	gunner	0
طائر	bicyclist	0
نسيج	cage	0
احباط	weapon	0
عاصفة	tornado	0
تهذيب	logic	0
تاجر	dealer	0
ممر	hall	0
ركلة	starting	0
بناء	residence	0
جيد	jacket	0
طعام	honey	0
مواجهة	war	0
مقاتل	transport	0
الجناح	bird	0
ذرة	matter	0
رئيس	government	0
جهاز	phone	0
تنافسا	match	0
طعام	flour	0
صك	radar	0
سلاح	knife	0
جناح	church	0
بناء	club	0
شجرة	coffee	0
المشروبات	coffee	0
شعور	happiness	0
المشاعر	sorrow	0
وجه	feature	0
كامل	cloth	0
طائر	gradation	0
حكومة	police	0
مستوى	stability	0
ملابس	skirt	0
حرب	campaign	0
جلس	couple	0
مركبة	coupe	0
تحويل	privatization	0
بناء	center	0
موضوع	desk	0
النباتية	lawn	0
علم	geographic	0
ذراع	gun	0
رئيس	president	0
صك	scale	0
سلاح	valve	0
دواء	discipline	0
مخلوق	horse	0
الطائرات	helicopter	0
ارتفاع	magnitude	0
سمة	humility	0
بضائع	vehicle	0
صوت	voice	0
حيوان	panda	0
بناء	suite	0
فاكهة	olive	0
تجارة	import	0
المخدرات	vegetable	0
عشب	acid	0
فاكهة	blackberry	0
وحش	cat	0
نواة	atom	0
مسابقة	match	0
نسبيا	son	0
موضوع	bag	0
سمة	objectivity	0
بضائع	diesel	0
البرد	illness	0
عقب	foot	0
موضوع	rocket	0
بندقية	military	0
حاوية	glass	0
فك	mouth	0
حملة	war	0
بيان	denial	0
بيان	abstract	0
سلاح	rocket	0
احتلال	print	0
النساء	girlfriend	0
جهاز	phone	0
حالة	emotion	0
فحم	goods	0
ملابس	cloak	0
المشاعر	compassion	0
انتقال	privatization	0
بيان	formula	0
مركبة	buggy	0
السائل	coffee	0
كتاب	booklet	0
مركب	craft	0
موضوع	robe	0
حيوان	hurry	0
فاكهة	olive	0
وثيقة	covenant	0
الزجاج	substance	0
الفراش	clothing	0
منزل	guard	0
عضو	language	0
مركب	yeast	0
الجناح	airplane	0
احتلال	education	0
عدوان	war	0
طائر	meena	0
مستهلك	mustache	0
موضوع	pot	0
بناء	tomb	0
بيان	clarification	0
جيد	cloak	0
وجبة	lunch	0
تدجين	fauna	0
موضوع	cap	0
شخص	mobile	0
سمة	determination	0
الاقتراض	loan	0
حرفة	phrase	0
مجموعة	mass	0
مخلوق	pheasant	0
منطقة	state	0
حيوان	dolphin	0
قفل	door	0
حاوية	cassette	0
طعام	cake	0
زيادة	building	0
يشرب	list	0
بناء	club	0
الحيوانات	birds	0
كلمة	pronoun	0
