# Supplementary material
Source: ML conference proceedings conference paper supplement (https://aclanthology.org/P19-1490)
Supplement: Supplementary [file P19-1490.Supplementary.zip › ungraded-le/fr-en/test-cohyp.txt]

opium	drug	1
maîtresse	woman	1
parenthèse	punctuation	1
sobriquet	appellation	1
chroniqueur	journalist	1
administration	tenure	1
beau-père	man	1
mach	machine	1
technicien	worker	1
déjeuner	meal	1
violoniste	performer	1
cygne	bird	1
charpentier	craftsman	1
irradiation	therapy	1
dépôt	station	1
allée	street	1
attaque	activity	1
café	beverage	1
cercueil	container	1
peuplier	wood	1
alliance	union	1
liquide	fluid	1
enclave	district	1
voile	garment	1
lecteur	educator	1
chapelle	building	1
grenade	weaponry	1
perquisition	attack	1
ouvrier	worker	1
affection	feeling	1
vaccin	antigen	1
fabrique	structure	1
explosif	chemical	1
alcool	drug	1
consortium	organization	1
auberge	house	1
ampleur	extent	1
vautour	bird	1
surprendre	feeling	1
adulte	organism	1
affranchissement	action	1
biologiste	scientist	1
constructeur	maker	1
refus	act	1
fils	male	1
alcool	liquid	1
asthme	disease	1
subside	grant	1
encre	fluid	1
impact	contact	1
écologiste	reformer	1
anneau	association	1
administrateur	administrator	1
café	liquid	1
bateau	vessel	1
choc	noise	1
bowling	activity	1
parenthèse	mark	1
bataille	activity	1
demi	fraction	1
amélioration	change	1
symptôme	information	1
incompatibilité	opposition	1
enzyme	protein	1
panier	container	1
buveur	user	1
autobiographie	history	1
analyste	expert	1
virus	microorganism	1
téléphone	equipment	1
buveur	consumer	1
orateur	speaker	1
pistolet	gun	1
curé	priest	1
benzène	hydrocarbon	1
exploitation	activity	1
limousin	car	1
crime	wrongdoing	1
cour	area	1
sympathie	feeling	1
institut	association	1
chaumière	dwelling	1
agitation	disorder	1
doigt	extremity	1
époux	relative	1
compassion	feeling	1
corruption	felony	1
économie	act	1
agonie	feeling	1
appréhension	anxiety	1
insurrection	conflict	1
librairie	shop	1
singe	primate	1
gilet	garment	1
alibi	justification	1
chalet	house	1
commentaire	message	1
golfeur	contestant	1
véhicule	conveyance	1
bijou	decoration	1
perle	jewel	1
baryton	singer	1
dérivée	calculation	1
danse	activity	1
caribou	deer	1
campement	site	1
milice	unit	1
osier	tree	1
voyageur	organism	1
impôt	charge	1
zèbre	stripes	1
conseiller	authority	1
abeille	insect	1
commission	organization	1
insecticide	pesticide	1
achat	acquisition	1
enthousiasme	feeling	1
notaire	official	1
anxiété	emotion	1
démocrate	politician	1
effroi	fear	1
eau-forte	print	1
baronnie	status	1
endurance	strength	1
liquide	substance	1
crainte	feeling	1
danse	art	1
entreprise	activity	1
colt	animal	1
pèlerin	traveler	1
conspiration	statement	1
abbé	clergyman	1
rapatriement	return	1
appareil	device	1
favori	artifact	1
papillon	insect	1
séance	conference	1
fauteuil	seat	1
générateur	equipment	1
réélection	election	1
évêque	clergyman	1
lavage	improvement	1
mentalité	cognition	1
vodka	liquor	1
collaboration	act	1
pied	toe	1
régulateur	mechanism	1
organiste	musician	1
truite	fish	1
contrainte	confinement	1
humanité	quality	1
âne	symbol	1
bruant	bird	1
commerce	exchange	1
chemise	garment	1
décennie	integer	1
invertébré	organism	1
grossiste	distributor	1
monsieur	man	1
pêcheur	worker	1
conseiller	expert	1
berceau	furniture	1
phonologie	linguistics	1
professionnel	adult	1
militaire	serviceman	1
constructeur	creator	1
fanion	symbol	1
soliste	performer	1
époux	spouse	1
fille	female	1
dialogue	speech	1
archevêque	priest	1
caractéristique	property	1
larve	organism	1
entreprise	undertaking	1
libéral	adult	1
majorité	amount	1
passage	legislation	1
alpha	letter	1
psychologie	science	1
corsaire	officer	1
violoncelliste	performer	1
chalet	dwelling	1
trio	group	1
induction	affair	1
doctrine	content	1
télé	broadcasting	1
investisseur	capitalist	1
colporteur	employee	1
défaite	disappointment	1
triomphe	ending	1
pétrole	fuel	1
essence	hydrocarbon	1
couvent	residence	1
générateur	apparatus	1
doyen	administrator	1
leucémie	cancer	1
sanglier	swine	1
cricket	insect	1
fonctionnaire	serviceman	1
attestation	document	1
procédure	activity	1
curé	clergyman	1
orme	tree	1
insecticide	chemical	1
crainte	emotion	1
campagnol	rodent	1
élément	cognition	1
bouleau	wood	1
soliste	musician	1
coup	act	1
fonderie	factory	1
agrément	support	1
aquarium	enclosure	1
film	product	1
portefeuille	container	1
analogie	reasoning	1
avenue	thoroughfare	1
chaise	position	1
enseignant	professional	1
acide	compound	1
escroquerie	transgression	1
abbé	status	1
chroniqueur	writer	1
façade	side	1
appel	request	1
ponton	boat	1
autorisation	approval	1
bureau	table	1
prieuré	residence	1
polymérase	enzyme	1
malheur	feeling	1
abeille	insect	1
journaliste	writer	1
architecte	creator	1
skieur	contestant	1
dague	knife	1
réparation	improvement	1
froid	disease	1
raffinerie	plant	1
charbon	fuel	1
armoire	furniture	1
bulletin	document	1
drogue	substance	1
préfet	head	1
fichier	record	1
douleur	symptom	1
avocat	professional	1
devin	intellectual	1
chouette	bird	1
humanisme	doctrine	1
fraise	berry	1
préambule	introduction	1
polymérase	catalyst	1
yacht	craft	1
planeur	aircraft	1
institut	organization	1
coquillage	invertebrate	1
amélioration	transformation	1
ingénierie	profession	1
chien	animal	1
sulfate	salt	1
télé	telecommunication	1
faucon	bird	1
télégraphe	apparatus	1
campagne	race	1
princesse	aristocrat	1
danse	art	1
barrière	structure	1
gagnant	contestant	1
promesse	act	1
élite	class	1
alliance	coalition	1
écureuil	rodent	1
éducation	act	1
voisin	organism	1
archevêque	bishop	1
carbonate	compound	1
fabrication	creation	1
argent	metal	1
gemme	crystal	1
conte	narrative	1
sénateur	legislator	1
invasion	attack	1
sanctuaire	building	1
javelot	instrument	1
algue	microorganism	1
porte	barrier	1
vélo	chain	1
invertébré	animal	1
alliance	organization	1
pronom	word	1
contrebandier	criminal	1
reptile	vertebrate	1
jean	garment	1
émigrant	traveler	1
monarque	representative	1
silo	structure	1
bière	beverage	1
rivière	water	1
plan	idea	1
deuil	sadness	1
ensoleillement	light	1
détective	policeman	1
vache	cattle	1
enseignement	profession	1
calcul	activity	1
défaite	happening	1
voyage	change	1
mortier	cannon	1
soupe	food	1
commissaire	administrator	1
lévrier	hound	1
révolution	change	1
confiture	conserve	1
monsieur	adult	1
glande	organ	1
parent	relative	1
encyclopédie	book	1
acteur	entertainer	1
quart	rank	1
marchandise	article	1
orchidée	flower	1
démocrate	leader	1
critique	disapproval	1
préfecture	district	1
commerçant	merchant	1
acteur	performer	1
accord	statement	1
agitation	activity	1
parasite	organism	1
ambassadeur	official	1
vaisseau	tube	1
communiste	leader	1
vertébré	animal	1
envie	resentment	1
fureur	anger	1
théâtre	building	1
actionnaire	capitalist	1
importance	value	1
conjoint	spouse	1
idéologie	orientation	1
troupe	soldier	1
cible	goal	1
poète	writer	1
gastéropode	mollusk	1
sentence	judgment	1
vitrine	furniture	1
pomme	produce	1
pesticide	chemical	1
ultimatum	request	1
cardinal	priest	1
violoncelliste	musician	1
cool	temperature	1
subside	aid	1
fureur	fury	1
chaumière	building	1
poisson	vertebrate	1
énumération	list	1
saxophoniste	performer	1
modernisation	improvement	1
concessionnaire	enterprise	1
insomnie	disorder	1
danseur	performer	1
infraction	activity	1
théâtre	structure	1
barrage	barrier	1
télécom	medium	1
cathédrale	church	1
danseur	entertainer	1
hépatite	disease	1
boisson	substance	1
infraction	wrongdoing	1
alliage	mixture	1
combustion	oxidation	1
biplan	airplane	1
pomme	fruit	1
greffe	operation	1
commentaire	statement	1
aristocratie	class	1
orage	storm	1
ambassadeur	diplomat	1
banquier	financier	1
voiture	wheel	1
oxyde	chemical	1
observatoire	building	1
buteur	player	1
ailier	athlete	1
linguistique	science	1
château	house	1
abattage	murder	1
écologiste	scientist	1
diversification	change	1
argument	disagreement	1
revolver	gun	1
pin	tree	1
assurance	protection	1
vendre	sale	1
castration	sterilization	1
juge	judge	1
cèdre	conifer	1
soprano	musician	1
hôpital	building	1
bataille	conflict	1
grossiste	supplier	1
film	show	1
asthme	illness	1
pomme	fruit	1
bombardier	airplane	1
équipe	unit	1
réforme	improvement	1
aquarium	tank	1
dicton	speech	1
cimetière	site	1
téléphone	medium	1
fromage	food	1
melon	fruit	1
crime	transgression	1
manteau	garment	1
polygone	figure	1
chaumière	house	1
socialiste	leader	1
sprinter	athlete	1
bourgeoisie	class	1
incitation	motivation	1
voyage	motion	1
directive	line	1
absence	condition	1
hôtel	structure	1
princesse	leader	1
banane	fruit	1
crise	difficulty	1
polymère	chemical	1
diplomate	official	1
mandataire	negotiator	1
chou	vegetable	1
taxe	charge	1
épuration	improvement	1
carte	representation	1
essence	substance	1
histogramme	chart	1
boussole	instrument	1
bijoutier	creator	1
pianiste	performer	1
arrêt	judgment	1
cyclisme	sport	1
contracter	agreement	1
promesse	commitment	1
pianiste	musician	1
boisson	fluid	1
bouteille	container	1
délinquance	guilt	1
thérapeutique	treatment	1
sociologie	science	1
essai	activity	1
haltérophile	athlete	1
éditeur	worker	1
bureau	furniture	1
linguiste	scientist	1
encre	liquid	1
chanteur	musician	1
côte	shore	1
fusil	gun	1
dioxyde	compound	1
nageur	athlete	1
érable	wood	1
armée	organization	1
radar	instrument	1
recommandation	proposal	1
fille	child	1
éducation	activity	1
campagne	venture	1
homme	homo	1
actionnaire	investor	1
batteur	musician	1
conjecture	opinion	1
skieur	athlete	1
aéronef	vehicle	1
baronnie	rank	1
mentalité	attitude	1
protestation	objection	1
colt	male	1
blé	cereal	1
gendarmerie	police	1
migration	change	1
amusement	activity	1
larve	animal	1
bloc	collection	1
commerçant	capitalist	1
chemin	way	1
sénateur	politician	1
camarade	friend	1
traitement	work	1
banquier	capitalist	1
continuation	act	1
fédération	organization	1
taverne	structure	1
mathématiques	science	1
faucon	bird	1
baryton	musician	1
golfeur	player	1
robe	garment	1
gouverneur	leader	1
chenille	animal	1
abondance	quantity	1
charbon	carbon	1
appréhension	emotion	1
panier	container	1
solide	antimatter	0
12	twenty-seven	0
conseiller	master	0
inférence	conjecture	0
nageur	amateur	0
intégrité	grace	0
club	hall	0
client	diabetic	0
commission	politburo	0
laine	knit	0
notaire	usher	0
chômage	situation	0
discrimination	corrections	0
annonce	shocker	0
continuation	role	0
atelier	distillery	0
adulte	Aries	0
bagarreur	Virgo	0
fromage	chocolate	0
aléa	excellence	0
recette	loss	0
aubaine	pineapple	0
tigre	blond	0
marin	serviceman	0
yaourt	curd	0
habitat	area	0
pomme	cherry	0
cachemire	tapa	0
contrée	cell	0
orateur	dictator	0
avocat	cripple	0
énumération	directory	0
sexe	breath	0
chef	captor	0
économie	kindness	0
greffier	hire	0
capitulation	pessimism	0
carburant	carcinogen	0
parent	cashier	0
saxophoniste	singer	0
campement	tee	0
destin	boom	0
crampe	anemia	0
cas	immunity	0
claviériste	trumpeter	0
réussite	discharge	0
velours	silk	0
prix	bequest	0
position	utilization	0
armoire	seat	0
pur	banana	0
habitat	body	0
peuplier	wicker	0
énumération	agenda	0
bagarreur	leader	0
beurre	cheese	0
décennie	forty	0
psychologie	mathematics	0
100	million	0
saxo	clarinet	0
quart	thirteenth	0
colporteur	demonstrator	0
convergence	change	0
avocat	captor	0
assassinat	name	0
persil	dandelion	0
chef	left-hander	0
tomahawk	bow	0
étape	morning	0
guêpe	Congregationalist	0
vêtement	black	0
feu	silo	0
galère	galley	0
30	fifteen	0
multiculturalisme	creed	0
dirigeant	ward	0
dirigeant	active	0
pur	basil	0
entier	root	0
assortiment	signage	0
éditeur	dealer	0
cohérence	manner	0
tigre	terror	0
oxyde	hydrate	0
dirigeant	heterosexual	0
voyageur	turner	0
adulte	explorer	0
chef	anomaly	0
mémorandum	minute	0
annonce	bid	0
data	Asia	0
panier	spoon	0
milice	spearhead	0
velours	web	0
encre	water	0
commentaire	truth	0
classe	engineering	0
chef	case	0
amusement	release	0
révolution	transmutation	0
collagène	keratin	0
amphétamine	sedative	0
désir	glow	0
défaite	malformation	0
scientifique	adjudicator	0
aide	operation	0
panier	drawer	0
pizza	soup	0
greffe	matrix	0
hypothèque	pledge	0
colère	hate	0
voisin	transfer	0
adulte	occultist	0
portefeuille	briefcase	0
baronnie	tenth	0
pizza	porridge	0
cas	anchorage	0
linguistique	nutrition	0
lance-roquette	arsenal	0
algèbre	geometry	0
crise	swamp	0
intégrité	representation	0
vingt	forty	0
désir	soul	0
cercueil	crate	0
chef	adventurer	0
procédure	turn	0
bouteille	tub	0
avocat	worker	0
débat	persuasion	0
explosif	reactant	0
calamité	adversity	0
sanglier	sow	0
extraction	leach	0
avocat	censor	0
hôtel	outbuilding	0
douleur	pang	0
bouleau	cherry	0
expert	copycat	0
cochon	bird	0
chanteur	organist	0
guêpe	Nonconformist	0
bouleau	chestnut	0
pêcheur	electrician	0
acacia	oak	0
ana	tobacco	0
airelle	lilac	0
compétition	return	0
doctrine	opinion	0
tigre	adjudicator	0
théâtre	aviary	0
cratère	vein	0
homme	butcher	0
commission	conservancy	0
quart	eighth	0
12	seventeen	0
gagnant	rival	0
dirigeant	reliever	0
entreprise	brokerage	0
monarque	sultan	0
droit	ethics	0
cachemire	silesia	0
théâtre	rink	0
saxophoniste	rocker	0
orchidée	chrysanthemum	0
invertébré	young	0
piano	organ	0
cour	cell	0
propos	direction	0
bambou	rosewood	0
achat	restitution	0
migrant	flier	0
cas	malady	0
générateur	condenser	0
adulte	heterosexual	0
riz	grist	0
cité	canton	0
aléa	infidelity	0
intégrité	being	0
extraction	transduction	0
évêque	Monsignor	0
réacteur	fuse	0
bagarreur	Sagittarius	0
emprunt	principal	0
région	junction	0
aristote	administration	0
importance	heredity	0
berline	cruiser	0
diplomate	Inquisitor	0
assemblée	congress	0
destin	trouble	0
histoire	disrespect	0
destin	error	0
chanteur	cellist	0
énumération	FAQ	0
perle	sapphire	0
juge	commissar	0
chef	personification	0
extraction	release	0
propriété	relationship	0
fruit	gemma	0
coriandre	pia	0
bagarreur	sphinx	0
journaliste	essayist	0
club	planetarium	0
cas	need	0
tigre	inhabitant	0
cohérence	constitution	0
scientifique	creditor	0
tissu	area	0
persil	medic	0
char	cab	0
filon	asphalt	0
café	mate	0
client	depressive	0
dortoir	gazebo	0
bien	strip	0
auteur	reporter	0
habitant	pursuer	0
siècle	festival	0
avocat	visionary	0
actif	mobility	0
importance	fullness	0
marqueur	insert	0
accouchement	craft	0
voile	suit	0
icône	nose	0
bâtiment	transept	0
aristote	leadership	0
marine	army	0
expert	closer	0
fruit	anther	0
institut	family	0
nageur	climber	0
tigre	gatekeeper	0
migration	slide	0
transparence	turbulence	0
adulte	chameleon	0
voyageur	thrower	0
banane	rosemary	0
crâne	phalanx	0
chêne	pine	0
orchidée	columbine	0
ressource	investment	0
rune	superscript	0
politique	scheme	0
marché	puncture	0
cavalier	migrant	0
ouvrier	agnostic	0
avocat	Pisces	0
cachemire	terry	0
emprisonnement	detention	0
crâne	cranium	0
procureur	commissar	0
chef	linguist	0
érable	oak	0
habitant	Pisces	0
grappe	cling	0
immunologie	gynecology	0
efficacité	abundance	0
marin	turner	0
scientifique	debtor	0
électrolyte	brine	0
métal	silicon	0
circonscription	field	0
mentalité	tolerance	0
attente	fetishism	0
voyageur	explorer	0
raffinerie	distillery	0
chef	Libra	0
avocat	seeker	0
riz	potato	0
adulte	blond	0
malheur	dislike	0
tigre	homunculus	0
chômage	illumination	0
intégrité	order	0
dioxyde	silica	0
dortoir	theater	0
pharmaceutique	cardiology	0
alcool	milk	0
asthme	pneumonia	0
parent	sort	0
bœuf	grade	0
économie	interaction	0
convergence	miracle	0
chef	adult	0
escadron	platoon	0
démocrate	Whig	0
enclave	jurisdiction	0
action	share	0
mouton	goat	0
avocat	adversary	0
essai	use	0
ouvrier	Jat	0
autorisation	mandate	0
conjoint	broad	0
librairie	bakery	0
liquidation	withdrawal	0
affranchissement	masterpiece	0
pudding	taco	0
île	forest	0
rassemblement	fringe	0
âne	dove	0
archiprêtre	bishop	0
voisin	philosopher	0
gingembre	wort	0
juge	notary	0
négation	condition	0
essai	buzz	0
âge	mid-February	0
éditeur	printer	0
pudding	salad	0
armure	militia	0
amusement	politics	0
maîtresse	broad	0
pur	Alexander	0
cadran	watch	0
ouragan	hurricane	0
baume	antidote	0
discrimination	nationalization	0
tomahawk	projectile	0
baryton	contralto	0
pur	buckwheat	0
préfecture	commune	0
mach	computer	0
adulte	White	0
cavalier	swimmer	0
compétition	integration	0
fluorescence	meteor	0
exportateur	importer	0
cancérologie	hygiene	0
collaboration	resistance	0
melon	pomegranate	0
chef	technician	0
glaucome	cataract	0
étude	testing	0
habitant	neutral	0
quart	fortieth	0
transparence	pressure	0
adulte	quarter	0
typographie	plumbing	0
coriandre	banana	0
attestation	report	0
parent	neighbor	0
colt	filly	0
heure	half-hour	0
équipage	side	0
propos	reminder	0
bagarreur	cashier	0
dame	dame	0
dirigeant	fastener	0
peuplier	elm	0
cour	gallery	0
tigre	party	0
four	microwave	0
arme	whip	0
adulte	collector	0
détention	captivity	0
voyageur	primitive	0
golfe	backwater	0
dirigeant	coward	0
voyageur	ethnic	0
aquarium	reservoir	0
comparaison	scan	0
préfet	commissioner	0
tigre	personification	0
loup	lichen	0
guerre	resistance	0
appareil	drive	0
baie	kiwi	0
érable	driftwood	0
bagarreur	appointee	0
humidité	damp	0
icône	award	0
piano	gong	0
émotion	pain	0
psychologie	nutrition	0
skieur	sharpshooter	0
marché	work	0
scientifique	turner	0
conservatisme	theocracy	0
désir	enthusiasm	0
parent	appointee	0
couple	quintet	0
crainte	love	0
caractéristique	quality	0
extraction	source	0
addition	supply	0
érable	rosewood	0
ministère	clergy	0
lance-roquette	torpedo	0
bagarreur	lover	0
cercueil	casket	0
coco	yogurt	0
abattement	devastation	0
habitant	creature	0
âge	lease	0
meurtrier	pusher	0
production	brewing	0
cadre	smith	0
calamité	hardship	0
cas	niche	0
habitant	Leo	0
compte	integer	0
chef	engraver	0
cadre	fisherman	0
médicament	neurology	0
commerçant	grocer	0
avocat	life	0
cadre	draftsman	0
tour	hull	0
diversification	move	0
bêche	suit	0
geôle	reformatory	0
esthétique	naturalism	0
habitant	birth	0
amusement	turn	0
cassette	Dumpster	0
abattement	complex	0
décennie	twenty-three	0
cachemire	screening	0
promesse	description	0
chef	double	0
général	major-general	0
frappeur	fielder	0
14	twenty-six	0
tigre	Virgo	0
employé	stringer	0
atelier	creamery	0
continuation	fun	0
cadre	tuner	0
colis	flinders	0
habitant	subject	0
chef	neighbor	0
auto	motorcycle	0
collagène	gelatin	0
cas	naturalization	0
voisin	debtor	0
auteur	voucher	0
tour	lookout	0
expert	life	0
bas	top	0
cuisinière	toaster	0
cas	receivership	0
impeachment	writ	0
danse	gem	0
parent	convert	0
autorisation	bill	0
psychologie	systematics	0
oxyde	incense	0
parent	pussycat	0
chef	Aries	0
crampe	inflammation	0
cas	urbanization	0
aéronaute	fisherman	0
hareng	swordfish	0
herbe	succulent	0
greffier	workman	0
commentaire	thing	0
modernisation	optimization	0
érable	teak	0
état	municipality	0
jument	racehorse	0
commission	jury	0
aïeule	grandfather	0
violoncelliste	clarinetist	0
jaune	green	0
bouteille	bowl	0
invertébré	zooplankton	0
annonce	condition	0
accusation	manifest	0
chômage	enlargement	0
aléa	utility	0
pur	rosemary	0
commission	grey	0
piano	kettle	0
acacia	willow	0
ouvrier	partner	0
document	paragraph	0
affection	dislike	0
siècle	millennium	0
pêcheur	grip	0
baryton	canary	0
tour	projection	0
affranchissement	smooth	0
oxyde	preservative	0
essence	charcoal	0
humanisme	nihilism	0
tigre	unfortunate	0
scientifique	appointee	0
négation	formula	0
carte	document	0
politique	tactic	0
bagarreur	applicant	0
sentiment	desire	0
habitat	floor	0
acacia	hazel	0
larve	prey	0
générateur	burner	0
velours	print	0
raz-de-marée	swell	0
frigo	cooler	0
chef	fisherman	0
manière	contrary	0
ni	manganese	0
greffe	taxis	0
aristote	membership	0
