# Supplementary material
Source: ML conference proceedings conference paper supplement (https://aclanthology.org/P19-1490)
Supplement: Supplementary [file P19-1490.Supplementary.zip › ungraded-le/fr-en/test-hypo.txt]

maîtresse	woman	1
main	finger	1
sobriquet	appellation	1
comité	unit	1
frégate	ship	1
jument	horse	1
beau-père	man	1
employé	worker	1
déjeuner	meal	1
violoniste	performer	1
cygne	bird	1
logement	dormitory	1
irradiation	therapy	1
lait	beverage	1
allée	street	1
attaque	activity	1
café	beverage	1
cercueil	container	1
poire	fruit	1
article	creation	1
velours	artifact	1
département	division	1
cidre	liquid	1
chapelle	building	1
ouvrier	worker	1
consolidation	union	1
affection	feeling	1
immigration	motion	1
vaccin	antigen	1
cavalier	traveler	1
explosif	chemical	1
alcool	drug	1
maître	educator	1
cidre	beverage	1
vautour	bird	1
redressement	improvement	1
huître	bivalve	1
propagande	message	1
artillerie	weaponry	1
constructeur	maker	1
refus	act	1
consortium	association	1
fils	male	1
alcool	liquid	1
subside	grant	1
encre	fluid	1
chiffon	artifact	1
différenciation	discrimination	1
perroquet	vertebrate	1
administrateur	administrator	1
café	liquid	1
choc	noise	1
parenthèse	mark	1
bataille	activity	1
enzyme	protein	1
autorisation	document	1
panier	container	1
buveur	user	1
autobiographie	history	1
maîtresse	adult	1
virus	microorganism	1
fluorescence	light	1
distribution	arrangement	1
buveur	consumer	1
législateur	leader	1
pistolet	gun	1
bosquet	forest	1
amusement	act	1
curé	priest	1
couple	set	1
exploitation	activity	1
limousin	car	1
crime	wrongdoing	1
certificat	document	1
refuge	place	1
sympathie	feeling	1
procureur	official	1
femme	female	1
autobus	conveyance	1
chaumière	dwelling	1
époux	relative	1
antibiotique	medicine	1
compassion	feeling	1
agonie	feeling	1
frappeur	player	1
aérodrome	facility	1
éducateur	professional	1
huître	mollusk	1
insurrection	conflict	1
enquête	inquiry	1
librairie	shop	1
gilet	garment	1
déséquilibre	situation	1
abri	structure	1
alibi	justification	1
recherche	work	1
hamster	rodent	1
greffier	worker	1
bijou	decoration	1
dérivée	calculation	1
correspondance	responsibility	1
danse	activity	1
caribou	deer	1
passerelle	structure	1
osier	tree	1
force	action	1
impôt	charge	1
zèbre	stripes	1
abeille	insect	1
commission	organization	1
bosquet	vegetation	1
chef	worker	1
émeute	aggression	1
organiste	performer	1
autoroute	road	1
démocrate	politician	1
eau-forte	print	1
crainte	feeling	1
danse	art	1
entreprise	activity	1
dessous	garment	1
pèlerin	traveler	1
cosmologie	philosophy	1
abbé	clergyman	1
coaching	employment	1
rapatriement	return	1
annonce	message	1
appareil	device	1
favori	artifact	1
fauteuil	seat	1
durcissement	alteration	1
réélection	election	1
évêque	clergyman	1
schizophrénie	psychosis	1
intestin	organ	1
lavage	improvement	1
colère	feeling	1
pied	toe	1
conseil	unit	1
trèfle	herb	1
régulateur	mechanism	1
organiste	musician	1
bijou	adornment	1
bruant	bird	1
commerce	exchange	1
chemise	garment	1
colère	emotion	1
décennie	integer	1
auberge	dwelling	1
blé	grass	1
monsieur	man	1
prévention	act	1
remboursement	compensation	1
berceau	furniture	1
professionnel	adult	1
optimisme	feeling	1
constructeur	creator	1
écharpe	garment	1
danse	diversion	1
barrage	obstruction	1
désaccord	difference	1
aide	act	1
chenille	larva	1
époux	spouse	1
boucher	merchant	1
chimiothérapie	therapy	1
fille	female	1
dialogue	speech	1
entreprise	undertaking	1
objectivité	trait	1
majorité	amount	1
alpha	letter	1
faucon	hawk	1
chalet	dwelling	1
trio	group	1
bastille	structure	1
armoire	furnishing	1
induction	affair	1
investisseur	capitalist	1
colporteur	employee	1
bijoutier	maker	1
dortoir	building	1
générateur	apparatus	1
doyen	administrator	1
leucémie	cancer	1
bibliothécaire	professional	1
sanglier	swine	1
rétine	membrane	1
gouvernement	organization	1
secret	message	1
cricket	insect	1
orme	tree	1
ministère	profession	1
anguille	fish	1
boisson	liquid	1
tournoi	contest	1
massage	treatment	1
crainte	emotion	1
classe	room	1
campagnol	rodent	1
groupe	crew	1
élément	cognition	1
coup	act	1
fonderie	factory	1
aquarium	enclosure	1
analogie	reasoning	1
avenue	thoroughfare	1
chaise	position	1
enseignant	professional	1
révolution	happening	1
escroquerie	transgression	1
ponton	boat	1
autorisation	approval	1
sulfate	compound	1
pamphlet	caricature	1
bureau	table	1
prieuré	residence	1
chalet	building	1
acide	chemical	1
cataracte	disease	1
meurtrier	criminal	1
communication	act	1
ancien	rank	1
architecte	creator	1
skieur	contestant	1
bibliothèque	book	1
dague	knife	1
électricien	worker	1
réparation	improvement	1
chef	supervisor	1
froid	disease	1
sobriquet	name	1
aïeul	forebear	1
ouragan	cyclone	1
raffinerie	plant	1
anxiété	fear	1
charbon	fuel	1
chef	cook	1
dioxyde	oxide	1
drogue	substance	1
mime	performer	1
avenue	street	1
devin	intellectual	1
cuirassé	ship	1
président	leader	1
chouette	bird	1
foule	crowd	1
conjoint	relative	1
fraise	berry	1
herbe	plant	1
préambule	introduction	1
défense	circumstance	1
polymérase	catalyst	1
chimie	science	1
yacht	craft	1
migrant	traveler	1
méthode	know-how	1
gastéropode	invertebrate	1
excavation	industry	1
chien	animal	1
dynamite	explosive	1
conjoint	woman	1
campagne	race	1
abri	housing	1
princesse	aristocrat	1
danse	art	1
affaiblissement	change	1
auberge	building	1
enlèvement	felony	1
arme	device	1
parachute	equipment	1
promesse	act	1
hydravion	airplane	1
cassette	container	1
avant-poste	position	1
revolver	pistol	1
plan	content	1
bonbon	sweet	1
éducation	act	1
archevêque	bishop	1
perroquet	bird	1
fabrication	creation	1
invitation	request	1
gemme	crystal	1
primauté	importance	1
tortue	reptile	1
invasion	attack	1
ampoule	bottle	1
autoroute	way	1
sanctuaire	building	1
javelot	instrument	1
violoniste	musician	1
porte	barrier	1
fromage	solid	1
jean	garment	1
émigration	motion	1
poulet	bird	1
monarque	representative	1
grenade	bomb	1
calculateur	device	1
mine	artifact	1
excitation	emotion	1
plan	idea	1
bateau	craft	1
calcul	activity	1
désir	feeling	1
défaite	happening	1
colère	emotion	1
fiabilité	responsibility	1
spéculateur	thinker	1
commissaire	administrator	1
acier	alloy	1
confiture	conserve	1
planification	activity	1
coopérative	enterprise	1
parent	relative	1
quart	rank	1
huile	lipid	1
baronne	aristocrat	1
rhum	liquor	1
marchandise	article	1
ambulance	car	1
orchidée	flower	1
démocrate	leader	1
critique	disapproval	1
commerçant	merchant	1
acteur	performer	1
danse	creation	1
grippe	disease	1
agitation	activity	1
ambassadeur	official	1
communiste	leader	1
chiot	dog	1
vertébré	animal	1
envie	resentment	1
propagande	information	1
théâtre	building	1
amendement	correction	1
conjoint	spouse	1
idéologie	orientation	1
troupe	soldier	1
poète	writer	1
corsaire	mariner	1
mur	bricks	1
approuver	approval	1
sprinter	runner	1
sentence	judgment	1
vitrine	furniture	1
pesticide	chemical	1
théorie	explanation	1
ultimatum	request	1
modérateur	adult	1
cardinal	priest	1
violoncelliste	musician	1
cool	temperature	1
moratoire	pause	1
projet	plan	1
séminaire	meeting	1
ange	benefactor	1
industrie	production	1
abbé	leader	1
métropole	municipality	1
bourgeoisie	people	1
club	structure	1
insomnie	disorder	1
théâtre	structure	1
chili	pepper	1
cathédrale	church	1
danseur	entertainer	1
hépatite	disease	1
berline	car	1
boisson	substance	1
persil	herb	1
alliage	mixture	1
combustion	oxidation	1
secret	information	1
pomme	fruit	1
greffe	operation	1
passion	feeling	1
commentaire	statement	1
emprunt	debt	1
aristocratie	class	1
administration	term	1
émotion	feeling	1
voiture	wheel	1
oxyde	chemical	1
buteur	player	1
ailier	athlete	1
linguistique	science	1
abattage	murder	1
diversification	change	1
enseignant	educator	1
argument	disagreement	1
revolver	gun	1
bambou	wood	1
assurance	protection	1
vendre	sale	1
castration	sterilization	1
fluide	substance	1
juge	judge	1
soprano	musician	1
grossiste	supplier	1
asthme	illness	1
acquittement	judgment	1
équipe	unit	1
réforme	improvement	1
hauteur	dimension	1
écologiste	biologist	1
dicton	speech	1
téléphone	medium	1
melon	fruit	1
préposition	word	1
gouverneur	politician	1
coco	solid	1
mangrove	tree	1
création	beginning	1
socialiste	leader	1
bourgeoisie	class	1
fonctionnalité	utility	1
directive	line	1
hôtel	structure	1
banane	fruit	1
vingt	integer	1
polymère	chemical	1
diplomate	official	1
mandataire	negotiator	1
chanteur	performer	1
taxe	charge	1
épuration	improvement	1
saxophoniste	musician	1
carte	representation	1
essence	substance	1
socialiste	politician	1
entreprise	work	1
pavillon	shelter	1
acharnement	hate	1
arrêt	judgment	1
descendance	relative	1
cyclisme	sport	1
candidat	politician	1
promesse	commitment	1
bouteille	container	1
évêque	priest	1
séminaire	conference	1
essai	activity	1
éditeur	worker	1
bureau	furniture	1
comté	location	1
radio	broadcasting	1
concert	show	1
linguiste	scientist	1
encre	liquid	1
chanteur	musician	1
fusil	gun	1
dioxyde	compound	1
nageur	athlete	1
conférence	association	1
armée	organization	1
sous-traitant	contractor	1
recommandation	proposal	1
nager	sport	1
extase	emotion	1
aïeul	ancestor	1
campagne	venture	1
barrière	obstruction	1
canonnière	vessel	1
sauce	food	1
observatoire	structure	1
fiabilité	trait	1
batteur	musician	1
skieur	athlete	1
aéronef	vehicle	1
baronnie	rank	1
inférence	reasoning	1
colt	male	1
blé	cereal	1
acacia	tree	1
hôtel	building	1
artisan	professional	1
dame	female	1
allure	rate	1
larve	animal	1
bloc	collection	1
essence	fuel	1
équipe	organization	1
hydrocarbure	compound	1
sous-traitant	builder	1
dortoir	structure	1
chemin	way	1
camarade	friend	1
impact	happening	1
traitement	work	1
banquier	capitalist	1
continuation	act	1
yacht	vessel	1
dame	woman	1
taverne	structure	1
mathématiques	science	1
scénariste	scriptwriter	1
chef	leader	1
habitat	structure	1
gouverneur	leader	1
sentiment	feeling	1
artiste	creator	1
escargot	mollusk	1
charbon	carbon	1
impératrice	sovereign	1
appréhension	emotion	1
panier	container	1
pistolet	revolver	0
musicien	organist	0
chien	terrier	0
expert	analyst	0
structure	made	0
police	gendarmerie	0
gens	bourgeoisie	0
défense	information	0
écrivain	scriptwriter	0
poulet	hen	0
bâtiment	vehicle	0
capitaliste	accounting	0
ornement	jewel	0
usine	foundry	0
acte	outcome	0
habitation	cottage	0
utilisation	engineering	0
somme	blanket	0
marque	directive	0
personnage	alpha	0
parent	stepmother	0
acte	debate	0
oiseau	chicken	0
ouvrier	frame	0
jugement	stop	0
drogue	drug	0
éducateur	teacher	0
aide	approval	0
animal	caterpillar	0
accord	contract	0
mot	pronoun	0
artisanat	galley	0
principal	smuggler	0
statut	abbe	0
sentiment	passion	0
marqueur	favorite	0
composé	acid	0
musicien	soprano	0
heure	no	0
arbre	elm	0
acte	help	0
télécommunication	tv	0
compensation	refund	0
boisson	cider	0
hostilité	disposition	0
adulte	spouse	0
suppression	replica	0
maladie	influenza	0
ouvrier	employee	0
oiseau	vulture	0
compte	statement	0
commander	injunction	0
cynisme	pessimism	0
intérêt	mortgage	0
altération	hardening	0
sentiment	capitulation	0
organisation	consortium	0
devise	species	0
unité	armor	0
protestation	boycott	0
acte	prevention	0
organisation	team	0
tristesse	mourning	0
agression	strength	0
oiseau	bunting	0
message	propaganda	0
produire	cluster	0
position	outpost	0
orientation	ideology	0
détachement	patrol	0
canon	mortar	0
policier	detective	0
proposition	building	0
activité	help	0
record	file	0
bâtiment	hospital	0
savoir-faire	method	0
homme	sir	0
cyclone	hurricane	0
ordinateur	microphone	0
marchande	trader	0
image	visualization	0
aliments	soup	0
concours	tournament	0
militaire	military	0
entrepreneur	subcontractor	0
représentation	map	0
concept	content	0
primate	monkey	0
créateur	jeweler	0
demandeur	party	0
accouchement	captivity	0
vêtement	shirt	0
enceinte	oven	0
protéine	polymerase	0
accouchement	people	0
fondateur	inflammation	0
couteau	dagger	0
courage	slaughter	0
activité	business	0
mouvement	emigration	0
manuel	manual	0
chimique	insecticide	0
scientifique	linguist	0
artefact	habitat	0
arrangement	distribution	0
quantité	abundance	0
scientifique	biologist	0
approbation	approve	0
fin	repeal	0
extrémité	finger	0
conflit	insurrection	0
position	chair	0
tissu	part	0
espérer	optimism	0
militaire	official	0
idée	plan	0
déité	muse	0
drogue	alcohol	0
classe	elite	0
pénétration	invasion	0
affaire	ceremony	0
vêtement	jeans	0
plat	sandwich	0
proposition	recommendation	0
aide	subside	0
cloison	parapet	0
mixte	joint	0
création	map	0
habitation	hostel	0
chef	president	0
artefact	building	0
capitaliste	banker	0
écrivain	poet	0
accouchement	class	0
adulte	educator	0
groupe	trio	0
artefact	favorite	0
composé	dioxide	0
sonate	symphony	0
structure	habitat	0
rang	former	0
discours	saying	0
organisme	chief	0
dortoir	housing	0
vêtement	coat	0
poire	produce	0
ouvrier	electrician	0
animal	shell	0
équipement	parachute	0
mot	preposition	0
correction	amendment	0
structure	hotel	0
progéniture	beauty	0
action	path	0
alliage	steel	0
voyageur	migrant	0
jonction	crossroads	0
livre	encyclopedia	0
cognition	element	0
penseur	speculator	0
montrer	concert	0
interprète	violinist	0
femelle	wife	0
amélioration	modernization	0
accouchement	constraint	0
hostilité	relentless	0
échange	trade	0
équipement	face	0
coureur	greyhound	0
avion	banana	0
athlète	winger	0
vêtement	sail	0
équipement	generator	0
poivre	chile	0
administrateur	prefect	0
logement	shelter	0
navire	artery	0
pistolet	revolver	0
voyageur	rider	0
compte	message	0
entier	complex	0
spore	pollen	0
souverain	empress	0
contenu	certainty	0
morphologie	anatomy	0
alcool	vodka	0
document	certificate	0
consommateur	drinker	0
message	secret	0
transport	vehicle	0
fabricant	builder	0
bétail	cow	0
événement	impact	0
propriété	endurance	0
fraction	half	0
contenu	doctrine	0
professionnel	educator	0
ingénieur	diesel	0
condition	sentence	0
intellectuel	decoder	0
partie	frame	0
élément	information	0
métier	education	0
transmission	multimedia	0
dérivation	race	0
maladie	disease	0
structure	club	0
activité	custom	0
district	state	0
vote	re-election	0
propriété	dimension	0
association	conference	0
employé	postman	0
substance	drug	0
réussite	happening	0
structure	vessel	0
charge	tax	0
dispositif	armed	0
stérilisation	castration	0
limite	scope	0
membre	administrator	0
action	economy	0
journaliste	chronicler	0
structure	silo	0
acte	stroke	0
science	mathematics	0
orateur	storyteller	0
organisation	federation	0
chaussure	pipe	0
véhicule	building	0
utilitaire	functionality	0
chef	democrat	0
amende	penalty	0
changement	revolution	0
buteur	contestant	0
interprète	dancer	0
insecte	butterfly	0
rang	quarter	0
bâtiment	club	0
entier	decade	0
réservoir	aquarium	0
sentiment	feeling	0
face	equipment	0
maison	chalet	0
malheur	calamity	0
instrument	javelin	0
affaire	induction	0
acte	borrowing	0
joie	bang	0
bivalve	oyster	0
interprète	pianist	0
transgression	fraud	0
maison	hostel	0
client	unfortunate	0
directive	mark	0
animal	invertebrate	0
femme	mistress	0
statut	championship	0
métier	government	0
maladie	cold	0
entreprise	campaign	0
organisation	government	0
structure	bastille	0
montrer	movie	0
désordre	agitation	0
docteur	surgery	0
accessibilité	convenience	0
instrument	radar	0
conférence	meeting	0
insecte	bee	0
corps	jury	0
ennuyeux	creation	0
acte	promise	0
organisation	ring	0
artefact	cashmere	0
carburant	coal	0
promesse	message	0
prêtre	bishop	0
chimique	oxide	0
superviseur	chief	0
radical	villa	0
accomplissement	postage	0
barrière	barrage	0
structure	restaurant	0
criminel	smuggler	0
alcool	rum	0
prêtre	archbishop	0
pasteur	bishop	0
rue	alley	0
marque	parenthesis	0
production	culture	0
substance	drink	0
relatif	progeny	0
chef	aristocrat	0
philosophie	cosmology	0
agent	capitalist	0
organisation	commission	0
chemin	course	0
lumière	sunshine	0
couler	influx	0
dispositif	calculator	0
ouvrier	mine	0
chien	cat	0
chaise	armchair	0
bâtiment	sanctuary	0
organisme	parent	0
hypothèse	frame	0
lettre	invitation	0
revenir	retaliation	0
musicien	drummer	0
rayures	zebra	0
concombre	melon	0
adulte	professional	0
enfant	girl	0
agent	drug	0
événement	convergence	0
herbe	clover	0
femme	lady	0
changement	improvement	0
événement	triumph	0
document	authorization	0
amélioration	reform	0
entreprise	dealer	0
acte	continuation	0
médicament	psychiatry	0
chambre	oven	0
aristocrate	baroness	0
information	propaganda	0
évêque	archbishop	0
porc	boar	0
aliments	sauce	0
dispositif	apparatus	0
charge	charge	0
psychose	schizophrenia	0
chef	abbe	0
produit	publication	0
micro-organisme	algae	0
artère	vessel	0
artefact	clothing	0
arbre	mangrove	0
capitaliste	investor	0
trait	objectivity	0
instrument	steel	0
concept	feature	0
établissement	aerodrome	0
croyance	humanism	0
fabricant	jeweler	0
adulte	artisan	0
père	former	0
trait	business	0
déclaration	agreement	0
siège	armchair	0
organe	intestine	0
production	excavation	0
symbole	pennant	0
certitude	authority	0
herbe	corn	0
politicien	democrat	0
obstruction	wing	0
doigt	hand	0
scientifique	environmentalist	0
peur	anxiety	0
droite	author	0
investisseur	shareholder	0
colère	fury	0
endroit	refuge	0
contestation	argument	0
oxyde	dioxide	0
chanteur	soprano	0
conflit	hook	0
texte	matter	0
éducation	education	0
vêtement	dress	0
directive	declaration	0
chef	legislator	0
appareil	telegraph	0
message	authorization	0
chambre	class	0
marchande	butcher	0
professionnel	reader	0
navire	yacht	0
prénom	nickname	0
établissement	deposit	0
statut	barony	0
envie	desire	0
fruit	apple	0
invertébré	shell	0
micro-organisme	virus	0
animal	colt	0
injonction	command	0
peur	fright	0
poster	outpost	0
composé	sulfate	0
trait	reliability	0
sentiment	fear	0
navire	sloop	0
qualité	equality	0
prose	article	0
traitement	massage	0
équipement	phone	0
avion	seaplane	0
quadrilatère	rectangle	0
oiseau	owl	0
jury	body	0
homo	man	0
information	symptom	0
négociateur	representative	0
armes	artillery	0
pertinence	accessibility	0
organisme	neighbour	0
mâle	colt	0
bijou	pearl	0
cognition	achievement	0
récipient	cassette	0
message	approve	0
émotion	excitation	0
ouvrier	editor	0
crime	removal	0
biologiste	environmentalist	0
collection	couple	0
instrument	compass	0
jugement	acquittal	0
événement	incident	0
pistolet	gun	0
eau	river	0
émotion	fear	0
agence	law	0
mécène	angel	0
boisson	coffee	0
partie	ingredient	0
athlète	weightlifter	0
avocat	prosecutor	0
obstruction	barrage	0
interprète	organist	0
adulte	sir	0
science	chemistry	0
sentiment	compassion	0
croyance	prevention	0
chaîne	bicycle	0
déclaration	account	0
sport	swim	0
doctrine	humanism	0
joueur	scorer	0
thérapie	irradiation	0
introduction	preamble	0
oiseau	parrot	0
périple	circuit	0
demande	invitation	0
amélioration	repair	0
sel	sulfate	0
anneau	organization	0
patrouille	detachment	0
habitant	inhabitant	0
plan	project	0
aquatique	bird	0
incidence	ratio	0
attaque	search	0
association	ring	0
chien	dog	0
désordre	insomnia	0
organisation	army	0
face	gear	0
liquide	coffee	0
ennui	stimulation	0
vertébré	parrot	0
inflammation	founder	0
éducateur	reader	0
bien-être	wellness	0
industrie	excavation	0
passage	corridor	0
favori	marker	0
reptile	turtle	0
réformateur	environmentalist	0
mollusque	gastropod	0
qualité	productivity	0
femelle	mistress	0
pétrole	oil	0
navire	bulb	0
vente	sale	0
bouteille	bulb	0
professionnel	artisan	0
interprète	cellist	0
capitaliste	exporter	0
structure	dormitory	0
abri	flag	0
abattage	spirit	0
création	boring	0
église	cathedral	0
bois	birch	0
artefact	cloth	0
maison	presbytery	0
chanteur	baritone	0
fluide	drink	0
voyageur	emigrant	0
événement	destiny	0
article	merchandise	0
transgression	crime	0
repas	lunch	0
coureur	sprinter	0
chien	greyhound	0
pièce	column	0
maladie	hepatitis	0
barge	pontoon	0
organisme	larva	0
maladie	cataract	0
constructeur	subcontractor	0
attraction	injury	0
utilisation	operation	0
