# Supplementary material
Source: ML conference proceedings conference paper supplement (https://aclanthology.org/P19-1490)
Supplement: Supplementary [file P19-1490.Supplementary.zip › ungraded-le/fr-en/train]

opium	drug	1
parenthèse	punctuation	1
chroniqueur	journalist	1
administration	tenure	1
mach	machine	1
technicien	worker	1
charpentier	craftsman	1
dépôt	station	1
peuplier	wood	1
alliance	union	1
liquide	fluid	1
enclave	district	1
voile	garment	1
lecteur	educator	1
grenade	weaponry	1
perquisition	attack	1
fabrique	structure	1
consortium	organization	1
auberge	house	1
ampleur	extent	1
surprendre	feeling	1
adulte	organism	1
affranchissement	action	1
biologiste	scientist	1
asthme	disease	1
impact	contact	1
écologiste	reformer	1
anneau	association	1
bateau	vessel	1
bowling	activity	1
demi	fraction	1
amélioration	change	1
symptôme	information	1
incompatibilité	opposition	1
analyste	expert	1
téléphone	equipment	1
orateur	speaker	1
benzène	hydrocarbon	1
cour	area	1
institut	association	1
agitation	disorder	1
doigt	extremity	1
corruption	felony	1
économie	act	1
appréhension	anxiety	1
singe	primate	1
chalet	house	1
commentaire	message	1
golfeur	contestant	1
véhicule	conveyance	1
perle	jewel	1
baryton	singer	1
campement	site	1
milice	unit	1
voyageur	organism	1
conseiller	authority	1
insecticide	pesticide	1
achat	acquisition	1
enthousiasme	feeling	1
notaire	official	1
anxiété	emotion	1
effroi	fear	1
baronnie	status	1
endurance	strength	1
liquide	substance	1
colt	animal	1
conspiration	statement	1
papillon	insect	1
séance	conference	1
générateur	equipment	1
mentalité	cognition	1
vodka	liquor	1
collaboration	act	1
truite	fish	1
contrainte	confinement	1
humanité	quality	1
âne	symbol	1
invertébré	organism	1
grossiste	distributor	1
pêcheur	worker	1
conseiller	expert	1
phonologie	linguistics	1
militaire	serviceman	1
fanion	symbol	1
soliste	performer	1
archevêque	priest	1
caractéristique	property	1
larve	organism	1
libéral	adult	1
passage	legislation	1
psychologie	science	1
corsaire	officer	1
violoncelliste	performer	1
doctrine	content	1
télé	broadcasting	1
défaite	disappointment	1
triomphe	ending	1
pétrole	fuel	1
essence	hydrocarbon	1
couvent	residence	1
fonctionnaire	serviceman	1
attestation	document	1
procédure	activity	1
curé	clergyman	1
insecticide	chemical	1
bouleau	wood	1
soliste	musician	1
agrément	support	1
film	product	1
portefeuille	container	1
acide	compound	1
abbé	status	1
chroniqueur	writer	1
façade	side	1
appel	request	1
polymérase	enzyme	1
malheur	feeling	1
abeille	insect	1
journaliste	writer	1
armoire	furniture	1
bulletin	document	1
préfet	head	1
fichier	record	1
douleur	symptom	1
avocat	professional	1
humanisme	doctrine	1
planeur	aircraft	1
institut	organization	1
coquillage	invertebrate	1
amélioration	transformation	1
ingénierie	profession	1
sulfate	salt	1
télé	telecommunication	1
faucon	bird	1
télégraphe	apparatus	1
barrière	structure	1
gagnant	contestant	1
élite	class	1
alliance	coalition	1
écureuil	rodent	1
voisin	organism	1
carbonate	compound	1
argent	metal	1
conte	narrative	1
sénateur	legislator	1
algue	microorganism	1
vélo	chain	1
invertébré	animal	1
alliance	organization	1
pronom	word	1
contrebandier	criminal	1
reptile	vertebrate	1
émigrant	traveler	1
silo	structure	1
bière	beverage	1
rivière	water	1
deuil	sadness	1
ensoleillement	light	1
détective	policeman	1
vache	cattle	1
enseignement	profession	1
voyage	change	1
mortier	cannon	1
soupe	food	1
lévrier	hound	1
révolution	change	1
monsieur	adult	1
glande	organ	1
encyclopédie	book	1
acteur	entertainer	1
préfecture	district	1
accord	statement	1
parasite	organism	1
vaisseau	tube	1
fureur	anger	1
actionnaire	capitalist	1
importance	value	1
cible	goal	1
gastéropode	mollusk	1
pomme	produce	1
subside	aid	1
fureur	fury	1
chaumière	building	1
poisson	vertebrate	1
énumération	list	1
saxophoniste	performer	1
modernisation	improvement	1
concessionnaire	enterprise	1
danseur	performer	1
infraction	activity	1
barrage	barrier	1
télécom	medium	1
infraction	wrongdoing	1
biplan	airplane	1
orage	storm	1
ambassadeur	diplomat	1
banquier	financier	1
observatoire	building	1
château	house	1
écologiste	scientist	1
pin	tree	1
cèdre	conifer	1
hôpital	building	1
bataille	conflict	1
film	show	1
pomme	fruit	1
bombardier	airplane	1
aquarium	tank	1
cimetière	site	1
fromage	food	1
crime	transgression	1
manteau	garment	1
polygone	figure	1
chaumière	house	1
sprinter	athlete	1
incitation	motivation	1
voyage	motion	1
absence	condition	1
princesse	leader	1
crise	difficulty	1
chou	vegetable	1
histogramme	chart	1
boussole	instrument	1
bijoutier	creator	1
pianiste	performer	1
contracter	agreement	1
pianiste	musician	1
boisson	fluid	1
délinquance	guilt	1
thérapeutique	treatment	1
sociologie	science	1
haltérophile	athlete	1
côte	shore	1
érable	wood	1
radar	instrument	1
fille	child	1
éducation	activity	1
homme	homo	1
actionnaire	investor	1
conjecture	opinion	1
mentalité	attitude	1
protestation	objection	1
gendarmerie	police	1
migration	change	1
amusement	activity	1
commerçant	capitalist	1
sénateur	politician	1
fédération	organization	1
faucon	bird	1
baryton	musician	1
golfeur	player	1
robe	garment	1
chenille	animal	1
abondance	quantity	1
époux	husband	0
somme	recipe	0
chef	communist	0
protéine	enzyme	0
organisme	parasite	0
navire	bottle	0
document	charge	0
vertébré	fish	0
attitude	mentality	0
bâtiment	restaurant	0
molécule	lipid	0
commande	agreement	0
officiel	notary	0
substance	coal	0
produire	perry	0
ouvrier	chief	0
ensemble	couple	0
adulte	lawyer	0
concurrent	swimmer	0
agent	drug	0
nombre	whole	0
chimique	explosive	0
enquête	investigation	0
taux	allure	0
abandon	extradition	0
musicien	cellist	0
désapprobation	critical	0
tentative	battle	0
disposition	free	0
bois	maple	0
activité	battle	0
adulte	moderator	0
rue	avenue	0
résidence	priory	0
thérapie	analysis	0
viande	solid	0
point	region	0
philosophie	law	0
atout	help	0
pièce	article	0
code	software	0
professionnel	teacher	0
rongeur	hamster	0
pessimisme	cynicism	0
ouvrier	mine	0
jugement	sentence	0
obstacle	prevention	0
consommation	food	0
bâtiment	ship	0
force	endurance	0
interprète	singer	0
meurtre	assassination	0
bois	cherry	0
dispositif	hood	0
marin	donkey	0
expert	advisor	0
arrivée	repatriation	0
boutique	bookstore	0
orateur	speaker	0
athlète	swimmer	0
qualité	atrocity	0
concept	frame	0
marin	corsair	0
inclination	propensity	0
croyance	certainty	0
ami	comrade	0
relatif	husband	0
dispositif	reactor	0
obstruction	fence	0
oiseau	aquatic	0
séries	taxonomy	0
condition	absence	0
cadre	concept	0
disposition	borrowing	0
tueur	murderer	0
composant	ingredient	0
activité	dance	0
plat	pizza	0
équipement	telegraph	0
cancer	leukemia	0
concept	restriction	0
substance	fluid	0
mouvement	immigration	0
direction	evolution	0
défenseur	deputy	0
région	court	0
équipement	face	0
classe	aristocracy	0
organisme	scientist	0
objectif	target	0
solide	yogurt	0
métier	engineering	0
politicien	the	0
concurrent	scorer	0
sentiment	desire	0
bâtiment	cottage	0
dérivation	dance	0
maladie	asthma	0
artefact	mine	0
articulation	joint	0
poisson	trout	0
ancêtre	grandfather	0
livraison	extradition	0
district	enclave	0
opération	attack	0
législation	passage	0
bruit	shock	0
message	promise	0
fin	defeat	0
ancien	father	0
représentation	visualization	0
boisson	milk	0
cuisinier	chief	0
hydrocarbure	benzene	0
ancêtre	grandfather	0
structure	tavern	0
principal	master	0
prix	acquisition	0
officiel	prosecutor	0
visionnaire	devin	0
oiseau	falcon	0
chef	candidate	0
concept	complex	0
fruit	bay	0
subvention	subside	0
moto	motorbike	0
représaille	return	0
haine	relentless	0
compétition	act	0
cheval	standard	0
melon	cucumber	0
musicien	singer	0
liquide	cider	0
science	sociology	0
briques	wall	0
amoureux	mistress	0
ponctuation	parenthesis	0
rongeur	vole	0
terme	administration	0
postulat	building	0
sentiment	surprise	0
composé	carbonate	0
artisanat	aircraft	0
tube	vessel	0
artisan	carpenter	0
situation	imbalance	0
dispositif	mach	0
demande	ultimatum	0
pénétration	search	0
professionnel	librarian	0
sentiment	affection	0
herbe	parsley	0
habitation	chalet	0
syndicat	alliance	0
application	engineering	0
art	dance	0
entier	figure	0
boisson	beer	0
activité	education	0
opération	graft	0
nationaliste	national	0
métal	silver	0
discussion	meeting	0
supérieur	chief	0
étonnement	surprise	0
conifère	cedar	0
intellectuel	devin	0
maison	cottage	0
croyance	waiting	0
acte	education	0
hiérarchie	taxonomy	0
contenu	waiting	0
abattage	courage	0
autorité	advisor	0
rongeur	squirrel	0
acte	refusal	0
stimulation	boredom	0
fournisseur	wholesaler	0
fleur	orchid	0
gâteau	biscuit	0
invertébré	gastropod	0
voyageur	foreign	0
périple	campaign	0
action	elect	0
performance	concert	0
arbre	acacia	0
publication	product	0
charge	tax	0
contenu	plan	0
bâtiment	observatory	0
pasteur	priest	0
déception	defeat	0
fin	winner	0
table	office	0
circonstance	defense	0
représentant	monarch	0
fruit	melon	0
discrimination	differentiation	0
plante	grass	0
ligne	directive	0
ouvrier	sinner	0
dimension	height	0
orage	thunderstorm	0
voiture	sedan	0
document	investigation	0
four	enclosure	0
récipient	bottle	0
vêtement	scarf	0
tuyau	footwear	0
structure	local	0
histoire	autobiography	0
grappe	produce	0
division	department	0
thérapie	chemotherapy	0
autobus	educator	0
politicien	socialist	0
nombre	account	0
concurrent	skier	0
défenseur	agent	0
hydrocarbure	gasoline	0
chemin	evolution	0
écrivain	journalist	0
acte	acquisition	0
employé	boy	0
produit	movie	0
perquisition	penetration	0
qualité	disposition	0
produire	vegetable	0
façon	passage	0
fresque	mural	0
sel	carbonate	0
liquide	drink	0
meurtre	slaughter	0
peine	fine	0
unité	group	0
athlète	sprinter	0
district	prefecture	0
activité	fun	0
animal	larva	0
interprète	actor	0
organisme	virus	0
idée	calendar	0
organisation	conference	0
tissu	graft	0
gens	delivery	0
financier	banker	0
politicien	candidate	0
rue	avenue	0
foule	crowd	0
mélange	steel	0
ameublement	furniture	0
organisme	traveler	0
époux	spouse	0
demande	call	0
