# Supplementary material
Source: ML conference proceedings conference paper supplement (https://aclanthology.org/P19-1490)
Supplement: Supplementary [file P19-1490.Supplementary.zip › ungraded-le/ru-en/test-cohyp.txt]

авто	vehicle	1
автобус	transport	1
автобус	vehicle	1
автомагистраль	road	1
автомобилист	driver	1
автомобиль	transport	1
адвокат	professional	1
академия	organization	1
аквариум	container	1
актёр	performer	1
альфа	star	1
английский	language	1
ара	bird	1
армянский	language	1
артист	human	1
архитектор	creator	1
астроном	scientist	1
бабочка	creature	1
балет	art	1
банда	community	1
банк	institution	1
барак	house	1
баритон	singer	1
барокко	style	1
басист	musician	1
берёза	tree	1
библиотека	building	1
библиотека	institution	1
библиотека	structure	1
благодарность	feeling	1
боль	feeling	1
больница	building	1
больница	edifice	1
больница	site	1
бомбардировщик	plane	1
бомбы	weapon	1
босс	leader	1
брат	kinsman	1
бригада	collective	1
броня	clothing	1
бык	creature	1
бык	mammal	1
бюро	organization	1
ван	vehicle	1
велосипед	vehicle	1
верховный	upper	1
вилла	building	1
вилла	construction	1
вино	drink	1
вино	fluid	1
виноград	berry	1
винтовка	gun	1
виолончель	instrument	1
вирус	program	1
внук	descendant	1
война	anger	1
вокалист	performer	1
волейбол	game	1
волк	animal	1
вор	criminal	1
ворона	bird	1
ворона	creature	1
воспаление	symptom	1
вратарь	athlete	1
вратарь	player	1
врач	specialist	1
вред	effect	1
выборы	vote	1
выносливость	strength	1
высота	dimension	1
высота	magnitude	1
генерал	officer	1
генерал	rank	1
генетики	science	1
география	science	1
геологии	science	1
гестапо	police	1
глава	leader	1
глаз	organ	1
год	period	1
головокружение	symptom	1
голод	feeling	1
голубь	creature	1
гордость	emotion	1
город	centre	1
город	port	1
город	territory	1
государство	city	1
государство	organization	1
граната	explosive	1
граната	weapon	1
девочка	human	1
девушка	human	1
декан	head	1
дельфин	vertebrate	1
депо	building	1
деревня	house	1
деревня	people	1
дерево	wood	1
десятка	quantity	1
детектив	policeman	1
детская	room	1
диаметр	distance	1
дизель	goods	1
длина	measurement	1
доверие	trait	1
договор	agreement	1
доктор	specialist	1
дом	roof	1
дома	building	1
драматург	writer	1
дружба	relations	1
дуб	tree	1
европейский	romanian	1
желание	feeling	1
железный	metal	1
женщина	human	1
жук	creature	1
жук	invertebrate	1
журавль	bird	1
заместитель	assistant	1
замок	accommodation	1
замок	edifice	1
заседание	event	1
защита	help	1
заяц	mammal	1
здание	elevator	1
здание	floor	1
здание	hall	1
здание	library	1
здание	roof	1
змея	creature	1
золотой	metal	1
зуд	symptom	1
играть	be	1
игрок	participant	1
изгнание	punishment	1
икона	picture	1
инвестиции	transaction	1
инженер	specialist	1
информация	knowledge	1
испанский	european	1
итальянский	european	1
камера	apparatus	1
камера	equipment	1
капитан	military	1
капитан	player	1
карман	container	1
квартет	ensemble	1
кенгуру	animal	1
киевский	ukrainian	1
кинжал	object	1
кислота	substance	1
кит	mammal	1
клинок	weapon	1
клуб	organization	1
кожа	material	1
коктейль	drink	1
колледж	school	1
колокол	device	1
колония	settlement	1
колонна	figure	1
команда	group	1
командир	head	1
командование	leadership	1
комик	performer	1
комиссар	policeman	1
конференция	event	1
кооператив	federation	1
копьё	weapon	1
корова	herbivore	1
король	leader	1
корона	prize	1
красный	color	1
крейсер	ship	1
крест	figure	1
криптографии	science	1
кролик	creature	1
кролик	mammal	1
круг	figure	1
крыса	creature	1
купить	acquire	1
купол	roof	1
ласточка	bird	1
лебедь	bird	1
лебедь	creature	1
лев	animal	1
лев	carnivore	1
лев	creature	1
лев	predator	1
лейтенант	officer	1
линейка	tool	1
линкор	vessel	1
линкор	watercraft	1
лиса	animal	1
лиса	carnivore	1
лихорадка	symptom	1
лицензия	document	1
лицо	forehead	1
лицо	mouth	1
личинка	animal	1
логика	discipline	1
логика	science	1
логотип	picture	1
логотип	sign	1
лозунг	saying	1
лук	produce	1
майор	officer	1
мак	plant	1
мальчик	human	1
мама	ancestor	1
мама	female	1
масло	goods	1
масло	product	1
матч	competition	1
маяк	tower	1
медведь	beast	1
медведь	mammal	1
металлург	specialist	1
метро	station	1
меч	weapon	1
мешок	container	1
миф	story	1
млекопитающих	vertebrate	1
молодёжь	people	1
молока	drink	1
молоко	fluid	1
молоко	liquid	1
монастырь	building	1
монастырь	dwelling	1
монография	book	1
мотоцикл	transport	1
мох	flora	1
мужество	emotion	1
мужчина	human	1
музыкант	artist	1
музыкант	performer	1
мясо	food	1
мятеж	conflict	1
надзор	surveillance	1
направление	document	1
наука	fact	1
недоверие	trait	1
нерв	tissue	1
нефть	substance	1
ник	pseudonym	1
нож	tool	1
нож	weapon	1
ночь	time	1
ноябрь	month	1
обелиск	monument	1
обитель	building	1
оборудование	goods	1
обряд	ceremony	1
обсерватория	building	1
общежитие	building	1
общение	interaction	1
овец	mammal	1
одежда	goods	1
одиночество	feeling	1
опухоль	illness	1
организация	branch	1
орёл	bird	1
оркестр	group	1
орудие	weapon	1
оса	creature	1
осень	time	1
основатель	creator	1
ответственность	duty	1
отель	house	1
отрывок	piece	1
отчаяния	feeling	1
отчёт	document	1
офицер	commander	1
охрана	defense	1
пальто	clothing	1
паника	emotion	1
папа	parent	1
певец	artist	1
педагогики	science	1
песок	substance	1
пианино	device	1
пианист	musician	1
пингвинов	bird	1
писатель	author	1
пистолет	implement	1
пистолет	weapon	1
плавание	sport	1
плато	terrain	1
платье	clothing	1
платье	garment	1
платье	object	1
плащ	garment	1
племя	community	1
площадка	space	1
победитель	contestant	1
повесть	narrative	1
подписать	write	1
позвоночных	fauna	1
полковник	military	1
полковник	officer	1
поляна	space	1
портрет	picture	1
поэзия	literature	1
поэт	human	1
правительство	power	1
православие	religion	1
предпочтение	selection	1
председатель	leader	1
преемник	human	1
президент	leader	1
прелат	clergyman	1
препарат	substance	1
прибор	means	1
привязанность	feeling	1
приют	place	1
продавец	employee	1
продажа	operation	1
продукт	goods	1
промежуток	time	1
пропаганда	information	1
противостояние	situation	1
профессор	teacher	1
псевдоним	name	1
психологии	science	1
психология	science	1
птица	animal	1
публицист	writer	1
пшеница	food	1
радар	instrument	1
радио	appliance	1
радость	emotion	1
разговор	communication	1
разрыв	separation	1
расчет	procedure	1
ребёнок	human	1
ревность	feeling	1
револьвер	gun	1
редактор	worker	1
ректор	head	1
республика	state	1
речь	argument	1
рубашки	clothing	1
рубашки	garment	1
рыбы	food	1
сад	tree	1
сарай	building	1
свод	structure	1
север	direction	1
семинар	gathering	1
семья	community	1
сенат	institution	1
сердце	organ	1
серебро	element	1
серебро	metal	1
сертификат	document	1
сигнал	information	1
симфония	music	1
синтез	method	1
систематики	science	1
скрипач	musician	1
скрипка	object	1
скульптура	art	1
слабость	symptom	1
словарь	text	1
слон	animal	1
слон	mammal	1
смех	emotion	1
собака	mammal	1
сова	bird	1
совы	bird	1
сокол	animal	1
сокол	bird	1
сокол	predator	1
солист	artist	1
солист	musician	1
солист	performer	1
соль	compound	1
соль	substance	1
сопротивление	act	1
сорт	characteristic	1
сосна	conifer	1
сосна	tree	1
соус	food	1
спираль	curve	1
список	register	1
спорт	activity	1
сражение	conflict	1
сталь	material	1
стальной	metal	1
стекла	substance	1
стихотворение	text	1
столица	city	1
страсть	feeling	1
страх	emotion	1
стрельба	sport	1
строитель	specialist	1
суп	food	1
счастье	feeling	1
табак	herb	1
танец	art	1
театр	organization	1
телевидение	appliance	1
телевидение	object	1
телефон	apparatus	1
тигр	animal	1
тигр	beast	1
тигр	carnivore	1
тигр	creature	1
топор	implement	1
топор	object	1
торпедо	weapon	1
тревога	emotion	1
трейлер	vehicle	1
трио	group	1
трон	furniture	1
труба	instrument	1
труба	object	1
тюрьма	institution	1
убежище	room	1
уголь	fuel	1
ударник	performer	1
удовольствие	emotion	1
удовольствие	feeling	1
указ	document	1
уменьшение	change	1
управление	practice	1
учитель	professional	1
учреждение	laboratory	1
фармакологии	science	1
фермент	molecule	1
фигура	form	1
физик	scientist	1
фирма	organization	1
форель	creature	1
форель	fish	1
форель	seafood	1
форель	vertebrate	1
фортепиано	instrument	1
фотограф	artist	1
фотограф	specialist	1
фрегат	ship	1
характеристика	description	1
храбрость	feeling	1
хранение	act	1
цена	value	1
церемония	procedure	1
церкви	building	1
цикл	sequence	1
чай	drink	1
чай	goods	1
часовня	building	1
черепаха	reptile	1
черепаха	vertebrate	1
черепахи	reptile	1
четвертьфинал	competition	1
шапка	clothes	1
шапка	covering	1
шкаф	furniture	1
школа	organization	1
школе	building	1
штраф	punishment	1
щит	device	1
экономист	specialist	1
электроники	science	1
энциклопедия	book	1
яблоко	food	1
яйца	food	1
ястреб	animal	1
яхта	watercraft	1
ящерица	animal	1
преподаватель	zoologist	0
пальма	lily	0
щука	whale	0
кино	temple	0
тюрьма	villa	0
грамматика	philosophy	0
кенгуру	horse	0
лось	whale	0
нефть	mud	0
паук	crocodile	0
вилла	bank	0
флигель	metro	0
кит	chimpanzee	0
грамматика	archeology	0
кенгуру	elephant	0
лягушка	boar	0
доктор	zoologist	0
театр	metro	0
скульптура	geology	0
клинок	shell	0
оса	scorpio	0
заяц	frog	0
винтовка	ax	0
квартет	people	0
караван	trio	0
кабан	deer	0
школа	tower	0
этимология	ethics	0
химия	metallurgy	0
пулемёт	gun	0
заяц	bird	0
конь	chimpanzee	0
жук	horse	0
гараж	tower	0
народ	caravan	0
лёд	iron	0
этимология	aesthetics	0
экология	algebra	0
ревность	discontent	0
кенгуру	cow	0
любовь	hunger	0
лисица	whale	0
инженер	builder	0
квартет	troupe	0
раздражение	jealousy	0
кукуруза	palm	0
гоголь	scorpio	0
уголь	butter	0
банда	society	0
фермент	zinc	0
беспокойство	pride	0
надежда	pleasure	0
лисица	frog	0
скульптура	ethics	0
ястреб	scorpio	0
церковь	villa	0
ящерица	rabbit	0
крыса	elephant	0
конь	fly	0
гвардия	squad	0
лось	lizard	0
кролик	chimpanzee	0
цинк	sugar	0
фермент	alcohol	0
клинок	revolver	0
труппа	command	0
торпедо	mortar	0
суд	mail	0
эфир	mercury	0
лебедь	rabbit	0
заяц	scorpio	0
скорпион	panther	0
доктор	anthropologist	0
олень	fly	0
спирт	mercury	0
лягушка	wolf	0
слон	chimpanzee	0
топор	mortar	0
толпа	troupe	0
банда	delegation	0
орудие	mortar	0
запись	encyclopedia	0
трава	palm	0
клинок	knife	0
фермент	dust	0
сова	whale	0
оркестр	quartet	0
лебедь	leopard	0
грамматика	sculpture	0
пшеница	fir	0
надежда	jealousy	0
влечение	surprise	0
пулемёт	rocket	0
соловей	spider	0
гордость	regret	0
лисица	chimpanzee	0
лось	rabbit	0
стихотворение	parody	0
логика	sociology	0
бабушка	donna	0
железо	mercury	0
корова	swan	0
заяц	goldeneye	0
кенгуру	hare	0
ящерица	turtle	0
глина	nitrogen	0
щука	lizard	0
алгебра	geography	0
влечение	love	0
пёс	horse	0
почта	villa	0
грамматика	metallurgy	0
социология	ethics	0
уголь	clay	0
лось	elephant	0
ртуть	sulfate	0
тревога	pride	0
раздражение	pleasure	0
трио	guard	0
жук	elephant	0
соловей	pike	0
драма	parody	0
караван	guard	0
сказание	essay	0
уголь	sand	0
бук	palm	0
кружок	crowd	0
лошадь	spider	0
крыса	goldeneye	0
витамин	sand	0
оса	swan	0
отряд	troupe	0
трава	lily	0
ястреб	swan	0
ястреб	elephant	0
сова	rat	0
заяц	chimpanzee	0
железо	butter	0
гараж	villa	0
геология	geography	0
лошадь	whale	0
конь	rabbit	0
лось	fly	0
базилика	mail	0
пистолет	mortar	0
сарай	university	0
трагедия	comedy	0
фотограф	architect	0
лисица	elephant	0
пёс	crocodile	0
трагедия	parody	0
лошадь	frog	0
мама	grandmother	0
трагедия	poem	0
оса	whale	0
сочувствие	discontent	0
эстетика	ethics	0
пёс	chimpanzee	0
аквариум	mail	0
базилика	temple	0
лазер	torpedo	0
сова	swan	0
школа	bank	0
стрела	dagger	0
ястреб	lizard	0
фермент	nitrogen	0
хронология	philosophy	0
заяц	pike	0
соловей	turtle	0
птица	wolf	0
птица	panther	0
уголь	nitrogen	0
общество	troupe	0
соль	sulfate	0
жук	fox	0
клён	birch	0
орудие	pistol	0
банда	orchestra	0
овёс	fir	0
каталог	poster	0
хронология	syntax	0
суд	church	0
толпа	company	0
корова	pike	0
математика	geography	0
трио	brigade	0
лёд	oil	0
кукуруза	lily	0
корова	spider	0
суд	garage	0
этика	archeology	0
гараж	aquarium	0
антрополог	architect	0
волк	fly	0
математика	metallurgy	0
алюминий	vitamin	0
астрономия	geography	0
соловей	chimpanzee	0
дворец	mail	0
сказание	song	0
сказание	novel	0
сова	rabbit	0
лазер	rifle	0
тигр	rabbit	0
гоголь	fly	0
лось	kangaroo	0
преподаватель	anthropologist	0
пулемёт	torpedo	0
гоголь	swan	0
штурман	architect	0
автомобилист	economist	0
башня	bank	0
крыса	turtle	0
гоголь	turtle	0
гоголь	horse	0
кенгуру	lizard	0
крыса	dog	0
гоголь	tiger	0
гнев	consciousness	0
тигр	wolf	0
тигр	panther	0
свинец	zinc	0
витамин	mud	0
караван	brigade	0
хронология	metallurgy	0
азот	dust	0
лисица	horse	0
кино	church	0
щука	goldeneye	0
кружок	brigade	0
щука	swan	0
уголь	dust	0
клинок	gun	0
конь	turtle	0
перечень	catalog	0
банда	company	0
волк	crocodile	0
квартет	brigade	0
кенгуру	goldeneye	0
медведь	spider	0
птица	rabbit	0
гордость	discontent	0
беспокойство	jealousy	0
раздражение	regret	0
жук	boar	0
совесть	sympathy	0
гнев	dislike	0
автомобилист	pilot	0
стихотворение	saga	0
любовь	discontent	0
лисица	leopard	0
лось	wasp	0
преподаватель	builder	0
соловей	fly	0
ящерица	panther	0
беспокойство	irritation	0
сова	bear	0
квартет	trio	0
заяц	crocodile	0
небоскрёб	university	0
народ	squad	0
экономика	biology	0
суд	abode	0
мама	donna	0
оркестр	company	0
кружок	squad	0
экономика	geography	0
лошадь	bear	0
фермент	lead	0
гнев	conscience	0
грамматика	algebra	0
соловей	leopard	0
орудие	arrow	0
экология	chronology	0
социология	syntax	0
обитель	villa	0
кино	villa	0
этимология	sculpture	0
сарай	abode	0
жир	lead	0
заяц	spider	0
лисица	pike	0
масло	ether	0
обитель	university	0
аквариум	church	0
надежда	attachment	0
лось	frog	0
тюрьма	skyscraper	0
караван	company	0
оса	leopard	0
банда	caravan	0
глина	sugar	0
нож	ax	0
слон	bear	0
паук	leopard	0
народ	delegation	0
астрономия	algebra	0
лошадь	crocodile	0
флигель	jail	0
гвардия	crowd	0
лазер	arrow	0
алюминий	oil	0
сожаление	jealousy	0
плакат	booklet	0
базилика	church	0
математика	geology	0
глина	vitamin	0
эфир	sand	0
экономика	ethics	0
лошадь	chimpanzee	0
совесть	irritation	0
пистолет	arrow	0
народ	company	0
соловей	elk	0
жук	kangaroo	0
лошадь	swan	0
геология	ethics	0
оркестр	delegation	0
тренер	pilot	0
пшеница	maple	0
кенгуру	hawk	0
коллегия	trio	0
пистолет	ax	0
оркестр	caravan	0
тревога	discontent	0
кружок	command	0
лён	fir	0
живопись	essay	0
гоголь	bear	0
соловей	kangaroo	0
железо	sand	0
медведь	chimpanzee	0
нож	rifle	0
социология	archeology	0
гараж	church	0
алгебра	geology	0
неприязнь	pleasure	0
орудие	shotgun	0
лёд	mud	0
берёза	pine	0
антрополог	zoologist	0
лисица	panther	0
трио	squad	0
заяц	horse	0
сова	dog	0
храм	villa	0
револьвер	shell	0
стрела	revolver	0
роман	comedy	0
лёд	zinc	0
кенгуру	bear	0
соль	iron	0
паук	rabbit	0
жир	coal	0
щука	fly	0
этика	metallurgy	0
базилика	villa	0
химия	syntax	0
слон	spider	0
обитель	mail	0
кенгуру	whale	0
гордость	irritation	0
лебедь	whale	0
этимология	sociology	0
паук	panther	0
бук	pine	0
соль	ice	0
школа	basilica	0
клинок	ax	0
слон	leopard	0
щука	bird	0
сова	horse	0
лось	tiger	0
храм	bank	0
лось	wolf	0
лёд	butter	0
соловей	crocodile	0
жук	pike	0
лазер	shell	0
церковь	bank	0
алгебра	syntax	0
астрономия	sociology	0
винтовка	torpedo	0
плакат	card	0
суд	cinema	0
олень	bear	0
небоскрёб	aquarium	0
фермент	vitamin	0
соловей	panther	0
нож	dagger	0
обитель	metro	0
сахар	mud	0
волк	scorpio	0
недовольство	hunger	0
лошадь	boar	0
ружьё	torpedo	0
лось	scorpio	0
трава	beech	0
квартет	caravan	0
оркестр	society	0
торпедо	ax	0
лилия	poplar	0
соль	oil	0
лось	leopard	0
олень	swan	0
надежда	anger	0
гвардия	brigade	0
уголь	iron	0
запись	catalog	0
логика	geology	0
револьвер	mortar	0
сарай	bank	0
лисица	crocodile	0
этимология	syntax	0
медведь	whale	0
сова	elk	0
лисица	spider	0
сочувствие	attachment	0
суд	palace	0
овёс	birch	0
филолог	builder	0
тигр	horse	0
скульптура	philosophy	0
бук	birch	0
лось	cow	0
кинжал	ax	0
лён	lily	0
песок	sulfate	0
башня	theater	0
театр	church	0
крокодил	leopard	0
овёс	poppy	0
пёс	rabbit	0
экономист	zoologist	0
сказание	painting	0
лисица	swan	0
жук	cow	0
удивление	attachment	0
эстетика	archeology	0
кружок	society	0
ружьё	ax	0
астрономия	biology	0
снаряд	ax	0
дворец	villa	0
жир	salt	0
экология	syntax	0
тигр	crocodile	0
небоскрёб	mail	0
география	syntax	0
народ	guard	0
кукуруза	maple	0
волк	rabbit	0
медведь	turtle	0
неприязнь	conscience	0
кабан	swan	0
пулемёт	ax	0
базилика	palace	0
ртуть	sand	0
ястреб	leopard	0
снаряд	rocket	0
олень	wolf	0
фермент	mercury	0
доктор	teacher	0
птица	turtle	0
кукуруза	pine	0
клён	pine	0
спирт	sand	0
банда	circle	0
спирт	clay	0
грамматика	ethics	0
доктор	philologist	0
