# Supplementary material
Source: ML conference proceedings conference paper supplement (https://aclanthology.org/P19-1490)
Supplement: Supplementary [file P19-1490.Supplementary.zip › ungraded-le/ru-en/test-hypo.txt]

аббатство	monastery	1
авто	vehicle	1
автобус	transport	1
автомобилист	driver	1
автомобиль	vehicle	1
автомобиль	wheels	1
адвокат	professional	1
актёр	performer	1
альфа	letter	1
альфа	star	1
армия	organization	1
армянский	language	1
артист	human	1
архитектор	creator	1
ассистент	position	1
банк	company	1
банк	institution	1
барабан	instrument	1
барак	house	1
баритон	singer	1
барокко	style	1
барон	nobleman	1
барон	title	1
барьер	obstruction	1
бас	instrument	1
бас	sound	1
баскетбол	game	1
башня	house	1
библиотека	building	1
библиотека	structure	1
билет	document	1
болото	terrain	1
больница	edifice	1
больница	institution	1
бомбардировщик	aircraft	1
бомбардировщик	plane	1
босс	leader	1
брат	kinsman	1
бригада	collective	1
броненосцы	mammal	1
броня	clothing	1
буддизм	religion	1
бук	tree	1
бульвар	road	1
бык	mammal	1
бюро	organization	1
вертолёт	transport	1
вилла	building	1
вилла	construction	1
вилла	habitation	1
вилла	house	1
вилла	lodging	1
вино	drink	1
вино	fluid	1
виолончелист	performer	1
виолончель	instrument	1
вирус	microorganism	1
внук	relative	1
воды	substance	1
военачальник	military	1
возраст	childhood	1
война	fight	1
вор	criminal	1
ворон	bird	1
ворона	animal	1
ворона	bird	1
ворона	creature	1
воскресенье	day	1
воспаление	symptom	1
восстание	conflict	1
вратарь	athlete	1
врач	specialist	1
вред	effect	1
встреча	agreement	1
выносливость	strength	1
генетики	science	1
географии	science	1
геологии	science	1
гестапо	police	1
гимн	song	1
глава	leader	1
глубина	distance	1
гнев	emotion	1
головокружение	symptom	1
гольф	sport	1
город	centre	1
город	port	1
город	territory	1
гостиница	building	1
государство	city	1
граната	explosive	1
гусеница	larva	1
девушка	human	1
декан	head	1
депо	building	1
деревня	house	1
деревня	people	1
дерево	bark	1
детская	room	1
джаз	music	1
длина	measurement	1
доклад	message	1
дом	roof	1
доцент	teacher	1
дыра	gap	1
европейский	british	1
европейский	serbian	1
ель	tree	1
железный	metal	1
женщина	human	1
живописец	artist	1
жук	creature	1
жук	invertebrate	1
журавль	bird	1
зал	room	1
замечание	statement	1
замок	defence	1
замок	defense	1
замок	dwelling	1
замок	home	1
замок	house	1
замок	lodging	1
замок	structure	1
защита	help	1
заяц	animal	1
здание	elevator	1
здание	hall	1
здание	roof	1
зеленый	color	1
зерновых	food	1
значок	signal	1
золотой	metal	1
ива	plant	1
играть	be	1
игрок	participant	1
изобретатель	creator	1
икона	picture	1
иллюстратор	artist	1
имя	word	1
инженер	specialist	1
институт	place	1
исследователь	scientist	1
итальянский	european	1
казино	game	1
казино	place	1
казнь	punishment	1
капитан	player	1
кардинал	bird	1
карман	container	1
каталог	list	1
квартет	collective	1
квартет	ensemble	1
квартет	group	1
кенгуру	animal	1
кенгуру	mammal	1
киевский	ukrainian	1
кинжал	weapon	1
кино	art	1
клинок	weapon	1
князь	title	1
кожа	material	1
коктейль	drink	1
колледж	school	1
колокол	device	1
колокол	instrument	1
колония	settlement	1
колонна	figure	1
командир	head	1
командование	leadership	1
комитет	organization	1
компания	collective	1
компьютер	system	1
конференция	event	1
копьё	weapon	1
корова	herbivore	1
королева	female	1
король	leader	1
корона	prize	1
костёл	temple	1
костюм	garment	1
кот	mammal	1
кофе	drink	1
крейсер	ship	1
крест	figure	1
кровати	furniture	1
кролик	beast	1
кролик	creature	1
кролик	mammal	1
круг	figure	1
круто	temperature	1
крыса	creature	1
кубок	prize	1
кубок	trophy	1
кукуруза	food	1
кукуруза	vegetable	1
купол	roof	1
лаборатория	room	1
ласточка	bird	1
лебедь	creature	1
лев	animal	1
лев	carnivore	1
лев	creature	1
лен	herb	1
лидер	head	1
линкор	ship	1
линкор	vessel	1
линкор	watercraft	1
лиса	animal	1
лихорадка	symptom	1
логотип	sign	1
лозунг	saying	1
локомотив	vehicle	1
лук	produce	1
любовь	emotion	1
лягушка	creature	1
майор	officer	1
мак	plant	1
мальчик	human	1
масло	goods	1
масло	product	1
масло	substance	1
математика	science	1
математике	science	1
математический	science	1
медведь	carnivore	1
медведь	mammal	1
меню	drink	1
металл	substance	1
метро	station	1
метро	transport	1
меч	weapon	1
мешок	container	1
мёд	food	1
министерство	institution	1
министерство	organization	1
молока	drink	1
молоко	liquid	1
монастырь	building	1
монография	book	1
мох	flora	1
мужество	emotion	1
музыкант	artist	1
мясо	food	1
надежда	feeling	1
надежды	feeling	1
надзор	surveillance	1
направление	document	1
наряд	clothing	1
население	society	1
насилие	abuse	1
негодование	anger	1
недоверие	trait	1
нерв	tissue	1
нефть	chemical	1
нефть	substance	1
ник	pseudonym	1
ночь	time	1
обитель	building	1
область	territory	1
оборудование	goods	1
обсерватории	building	1
объявление	information	1
огромный	big	1
одежда	goods	1
одежда	pocket	1
олень	creature	1
олень	mammal	1
организация	branch	1
орел	creature	1
орел	raptor	1
ослабление	transformation	1
особняк	house	1
отрывок	piece	1
отчаяния	feeling	1
отчёт	document	1
офицер	commander	1
охрана	defense	1
падение	motion	1
палата	building	1
палата	structure	1
пальто	clothing	1
паника	emotion	1
паника	fear	1
папа	parent	1
парламент	organization	1
пение	art	1
пересмотр	statement	1
перчатки	clothing	1
песок	substance	1
пианино	device	1
пиво	beverage	1
пила	tool	1
писатель	author	1
пистолет	implement	1
пистолет	weapon	1
плавание	sport	1
платье	clothes	1
плащ	clothing	1
плащ	covering	1
плащ	garment	1
плащ	object	1
плотины	building	1
площадка	space	1
победитель	contestant	1
побережье	terrain	1
поезд	conveyance	1
позвоночных	fauna	1
полковник	officer	1
поляна	space	1
посол	diplomat	1
поэзия	works	1
поэма	poems	1
поэт	human	1
правительство	group	1
православие	christianity	1
преемник	human	1
прелат	clergyman	1
преобразование	change	1
преподавание	training	1
привязанность	feeling	1
приматов	mammal	1
принцесса	aristocrat	1
продавец	employee	1
продавец	worker	1
продвижение	displacement	1
продукт	goods	1
прозвище	name	1
промежуток	time	1
псевдоним	name	1
психологии	science	1
психология	science	1
публицист	writer	1
пытки	abuse	1
радар	instrument	1
разрыв	discrepancy	1
разрыв	separation	1
ракета	weapon	1
ракообразных	fauna	1
расчет	procedure	1
ребёнок	human	1
ревность	emotion	1
резня	abuse	1
ректор	leader	1
рептилий	vertebrate	1
рубашки	clothing	1
рукопись	text	1
саксофон	instrument	1
саксофон	object	1
сарай	building	1
семья	community	1
сенат	institution	1
серебро	metal	1
серебряный	metal	1
симпатии	feeling	1
симфония	music	1
скорость	characteristic	1
скрипка	instrument	1
скульптура	art	1
словарь	text	1
смех	emotion	1
снаряд	weapon	1
собака	carnivore	1
собака	mammal	1
сова	bird	1
сова	creature	1
сова	predator	1
совы	bird	1
сокол	predator	1
солист	artist	1
соль	compound	1
сомнения	emotion	1
сопротивление	act	1
соревнование	activity	1
сорт	characteristic	1
сосна	conifer	1
соус	food	1
спорт	activity	1
сталь	material	1
стальной	metal	1
старт	beginning	1
стихотворение	composition	1
стихотворение	text	1
столица	city	1
страсти	feeling	1
судороги	symptom	1
сценарист	author	1
сценарист	writer	1
сыр	food	1
сэр	man	1
табак	herb	1
театр	organization	1
телевидение	object	1
телескоп	instrument	1
телефон	apparatus	1
телефон	device	1
течение	displacement	1
течение	motion	1
тигр	carnivore	1
тигр	creature	1
ткань	material	1
тополь	angiosperm	1
тополь	plant	1
топор	object	1
топор	weapon	1
торпедо	weapon	1
тошнота	symptom	1
трамвай	transport	1
трасса	route	1
тревога	emotion	1
трейлер	vehicle	1
трио	group	1
трон	furniture	1
труба	instrument	1
труба	object	1
туманность	symptom	1
тюрьма	institution	1
убежище	room	1
убийство	abuse	1
уголь	fuel	1
указ	document	1
управление	practice	1
учебник	book	1
учреждение	laboratory	1
фауна	scorpio	1
фермент	molecule	1
фигура	form	1
физик	scientist	1
физиологии	science	1
фирма	organization	1
фонд	assets	1
форель	food	1
форель	vertebrate	1
фортепиано	instrument	1
фотограф	artist	1
фрегат	ship	1
футбол	sport	1
характеристика	description	1
химик	scientist	1
храбрость	feeling	1
храм	building	1
церкви	building	1
церковь	organization	1
цифра	sign	1
чай	goods	1
чайки	bird	1
часовня	building	1
черепаха	reptile	1
черный	color	1
чёрный	color	1
шапка	clothes	1
шапка	object	1
школа	building	1
школа	collective	1
школа	institution	1
школа	place	1
шлюз	entrance	1
щит	device	1
экономика	science	1
экономист	scientist	1
экономист	specialist	1
электроники	science	1
яблоко	food	1
яблоко	fruit	1
японский	language	1
ястреб	animal	1
ястреб	bird	1
ястреб	creature	1
ястреб	predator	1
яхта	craft	1
яхта	watercraft	1
ящерица	animal	1
полиция	gestapo	0
существо	frog	0
управление	administration	0
суть	juice	0
ткань	nerve	0
здание	observatory	0
белка	milk	0
зверь	lizard	0
крыша	building	0
перемещение	advancement	0
строительство	villa	0
люди	youth	0
возможность	decree	0
командир	officer	0
священник	vicar	0
получить	buy	0
здание	rink	0
инструмент	pianist	0
хищник	eagle	0
расстояние	height	0
ученый	astronomer	0
документ	ticket	0
жилище	palace	0
музыкант	instrument	0
фрукты	beans	0
полуостров	cape	0
воспитание	effect	0
генерал	monk	0
информация	propaganda	0
ассортимент	band	0
украинец	kiev	0
сосна	drawing	0
химический	oil	0
размер	value	0
последовательность	cycle	0
рассказ	genre	0
боевой	war	0
группа	transport	0
производить	lime	0
книга	collection	0
объект	tv	0
метод	synthesis	0
фигура	bridge	0
наука	ballistics	0
пища	cheese	0
вещество	sand	0
рыба	trout	0
стоимость	probability	0
сбор	seminar	0
идея	value	0
лидер	president	0
радость	celebration	0
обо	structure	0
пища	meat	0
птица	crane	0
игра	casino	0
песня	anthem	0
черта	cleaning	0
круг	way	0
финансирование	program	0
здание	morgue	0
инструмент	saxophone	0
фотография	activity	0
инструмент	scissors	0
буря	typhoon	0
черта	pride	0
эффект	hit	0
животное	dog	0
автомобиль	from	0
еда	dinner	0
хозяин	mistress	0
совместный	knee	0
специалист	builder	0
вещество	intermediate	0
сайт	castle	0
очистка	treatment	0
симптом	atrophy	0
мебель	table	0
жилище	cottage	0
черта	confidence	0
пища	whale	0
звезда	sun	0
симптом	nebula	0
порт	city	0
информация	encyclopedia	0
коллектив	brigade	0
автор	reviewer	0
данные	entry	0
автомобиль	sloop	0
арсенал	factory	0
автомобиль	tanker	0
рабочий	aviator	0
специалист	economist	0
подразделение	secession	0
известность	human	0
расстояние	diameter	0
фрукты	almond	0
жилище	castle	0
расстояние	range	0
воздух	mixture	0
создатель	architect	0
комиссия	organ	0
специалист	engineer	0
здание	depot	0
птица	crow	0
дерево	arboretum	0
время	autumn	0
окончательный	contest	0
организация	church	0
запахом	garment	0
черта	reliability	0
сопротивления	clothing	0
лечение	demand	0
вещество	coal	0
семена	flora	0
деление	change	0
оружие	dagger	0
территория	city	0
сигнал	logo	0
фрукты	apple	0
футбольный	coincidence	0
глава	baron	0
посуда	cup	0
совпадение	event	0
орган	heart	0
ремесло	tanker	0
государство	advice	0
декларация	statement	0
группа	expedition	0
фабрика	arsenal	0
удар	effect	0
сайт	cemetery	0
корабль	leader	0
зверь	turtle	0
птица	penguins	0
зверь	tiger	0
профессиональный	tutor	0
стоимость	size	0
председатель	co-worker	0
птица	ani	0
человек	man	0
флора	sunflower	0
направление	north	0
производить	apricot	0
покрытие	dress	0
искусство	ballet	0
колонна	newspaper	0
дерево	spruce	0
офис	camera	0
человек	angel	0
человек	successor	0
контейнер	cup	0
семейство	rank	0
представитель	deputy	0
товар	textile	0
вещество	drug	0
здание	court	0
учреждение	ministry	0
распоряжение	opportunity	0
родина	end	0
пища	sandwich	0
руководство	information	0
сторонник	economist	0
автомобиль	bike	0
одежда	vest	0
опухоль	cancer	0
лифт	building	0
документ	decree	0
глава	ruler	0
время	occupation	0
заявление	concert	0
состав	singing	0
инструмент	piston	0
пространство	area	0
металл	silver	0
управление	treatment	0
жанр	textbook	0
состав	ballet	0
дворянство	people	0
изменение	coup	0
окружение	community	0
защита	castle	0
симптом	edema	0
художник	musician	0
заявление	declaration	0
одежда	coat	0
преступник	traitor	0
искусство	singing	0
сообщение	mail	0
язык	russian	0
товар	pork	0
заряд	snow	0
порт	town	0
вера	religion	0
изменение	progress	0
имя	rank	0
одежда	scarf	0
орган	colon	0
животное	crow	0
заявление	true	0
предок	mother	0
количество	ten	0
лаборатория	institution	0
сообщество	city	0
стоимость	maximum	0
правительство	time	0
делать	call	0
улучшение	rupture	0
чувство	happiness	0
играть	coincidence	0
большой	deep	0
место	university	0
время	stage	0
ранг	general	0
спортсмен	goalkeeper	0
ремесло	vehicle	0
должность	assistant	0
глубина	region	0
персонаж	heroine	0
пол	room	0
вызвать	make	0
изменение	decrease	0
федерация	cooperative	0
производить	banana	0
материал	steel	0
завоевание	purchase	0
одежда	kimono	0
почта	card	0
искусство	cinema	0
газ	steam	0
канал	bridge	0
процедура	selection	0
прибор	radio	0
инструмент	telescope	0
панель	list	0
пища	jelly	0
вещество	metal	0
стоимость	speed	0
центр	town	0
птица	geese	0
существо	dove	0
терапия	physiotherapy	0
пункт	product	0
инструмент	musician	0
существо	butterfly	0
дом	castle	0
существо	rat	0
точка	zenith	0
эмоции	fright	0
быть	play	0
документ	leadership	0
группа	command	0
реактор	complex	0
корпус	castle	0
немного	thin	0
постановление	justification	0
адвокат	judge	0
переехать	escape	0
группа	detachment	0
дерево	inga	0
героизм	quality	0
заявление	representation	0
государство	weather	0
замена	fall	0
спортсмен	captain	0
вечер	dusk	0
крыша	dome	0
дерево	laurel	0
специалист	photographer	0
эмоции	repentance	0
транспорт	scooter	0
инструмент	knife	0
жидкий	milk	0
пространство	premise	0
действовать	set	0
ракета	implement	0
состав	ward	0
мебель	place	0
трава	clover	0
изменение	transformation	0
действовать	delegation	0
аппарат	camera	0
инструмент	nose	0
производить	corn	0
рабочий	cook	0
птица	gulls	0
люди	crowd	0
существо	crow	0
сюжет	painting	0
фрукты	lemon	0
напиток	wine	0
рабочий	cowboy	0
здание	churches	0
объект	cello	0
товар	clothes	0
коллекция	archive	0
наука	mathematical	0
искусство	dance	0
предложение	detention	0
проход	hall	0
вещество	compound	0
история	myth	0
коллектив	quartet	0
человек	artist	0
художник	maestro	0
инструмент	radar	0
смесь	air	0
художник	classic	0
инструмент	bass	0
фрукты	cranberry	0
конфликт	insurrection	0
дерево	garden	0
советский	leningrad	0
человек	fame	0
время	government	0
товар	tea	0
движение	fall	0
растение	poppy	0
люди	village	0
судно	yacht	0
процедура	ceremony	0
фирма	publisher	0
вместимость	consciousness	0
наука	history	0
человек	poet	0
захват	receipt	0
оружие	boomerang	0
оружие	ax	0
лидер	chairperson	0
обо	tour	0
эффект	harm	0
управление	manufacturing	0
состав	foundation	0
представитель	premier	0
местность	coast	0
мероприятия	command	0
эль	letter	0
птица	eagle	0
жилье	castle	0
список	catalog	0
жидкость	milk	0
связь	conversation	0
правитель	chapter	0
рабочий	editor	0
напиток	cocktail	0
аристократ	princess	0
справедливость	attitude	0
клиника	garment	0
лоб	face	0
объект	bed	0
одежда	outfit	0
отряд	guards	0
представление	presentation	0
предок	mama	0
текст	scroll	0
вопрос	argument	0
художник	singer	0
хищник	hawk	0
комедия	composition	0
музыкант	soloist	0
животное	wolf	0
пища	starvation	0
нос	instrument	0
объект	box	0
инструмент	corkscrew	0
отношение	justice	0
жилище	office	0
корень	communication	0
товар	butter	0
одежда	jacket	0
коллектив	commune	0
количество	value	0
представитель	chairperson	0
спортивный	football	0
чувство	cynicism	0
дерево	birch	0
игра	match	0
стоимость	minimum	0
филиал	organization	0
пример	science	0
хорошо	dress	0
учреждение	senate	0
уха	fruit	0
основание	substance	0
список	panel	0
инструмент	file	0
мероприятия	sport	0
дворянин	baron	0
пища	honey	0
железо	equipment	0
исполнитель	musician	0
политический	party	0
предмет	chemistry	0
аргумент	complaint	0
издание	collection	0
государство	race	0
погода	situation	0
стоимость	weight	0
граната	arm	0
перевозки	vehicle	0
цифра	unit	0
ущелье	valley	0
чувство	wish	0
металл	steel	0
искусство	fresco	0
рабочий	navigator	0
рыба	catfish	0
распределение	financing	0
глава	conductor	0
дом	cruiser	0
группа	belt	0
место	school	0
игра	bowling	0
чувство	enthusiasm	0
кривая	spiral	0
день	sunday	0
крест	signature	0
инструмент	bells	0
занятие	time	0
день	evening	0
лидер	ship	0
взрывной	grenade	0
снег	charge	0
ошибка	beetle	0
вещество	oil	0
герб	sickle	0
лечение	legislation	0
цвет	black	0
государство	empire	0
место	abbey	0
изменение	treatment	0
пища	soup	0
соревнование	coincidence	0
наука	economy	0
чувство	liking	0
приобретать	buy	0
линейка	tyrant	0
дерево	oak	0
симптом	effect	0
список	vote	0
атака	war	0
система	tv	0
коллектив	company	0
художник	illustrator	0
художник	painter	0
экономика	industry	0
активность	property	0
движение	wave	0
количество	charge	0
птица	hawk	0
посуда	battery	0
автомобиль	limousine	0
перечень	information	0
наука	pathology	0
организация	army	0
движение	journey	0
энергия	capacity	0
одежда	dress	0
свадьба	people	0
вещество	salt	0
существо	hawk	0
эмоции	anxiety	0
игра	swing	0
покрытие	cap	0
растение	tea	0
инструмент	trumpet	0
черта	determination	0
трофей	cup	0
пища	supermarket	0
финансирование	allocation	0
состав	about	0
